# Supplementary material for: Formation of tungsten ethylidene complexes from diethyl complexes through a proton-catalyzed rearrangement of ethylene
Source: Royal Society of Chemistry journal article supplement (doi:10.1039/d5sc07302b), 2025-11-12
Supplement: d5sc07302b2.pdf [file d5sc07302b2.pdf]

This version of the Supplementary Information was published on 30/01/26

## Supporting Information for

### Formation of Tungsten Ethylidene Complexes from Diethyl Complexes Through a Proton-Catalyzed Rearrangement of Ethylene

Milan Maji, Landley Zeng, Richard R. Schrock,<sup>a\*</sup> Matthew P. Conley,<sup>a</sup> and  
Veronica Carta<sup>a</sup>

Department of Chemistry, University of California at Riverside, Riverside, California 92521

#### Contents

|                                                                                                                                                                                               |           |
|-----------------------------------------------------------------------------------------------------------------------------------------------------------------------------------------------|-----------|
| <b>1. General Considerations</b>                                                                                                                                                              | <b>S3</b> |
| <b>2. NMR Spectra</b>                                                                                                                                                                         | <b>S3</b> |
| <b>Figure S1.</b> <sup>1</sup> H NMR spectrum of W(NAr) <sub>2</sub> Et <sub>2</sub> .                                                                                                        |           |
| <b>Figure S2.</b> <sup>13</sup> C NMR spectrum of W(NAr) <sub>2</sub> Et <sub>2</sub> .                                                                                                       |           |
| <b>Figure S3.</b> <sup>1</sup> H-COSY spectrum W(NAr) <sub>2</sub> Et <sub>2</sub> .                                                                                                          |           |
| <b>Figure S4.</b> The aliphatic area of the HSQC { <sup>1</sup> H; <sup>13</sup> C} spectrum of W(NAr) <sub>2</sub> Et <sub>2</sub> .                                                         |           |
| <b>Figure S5.</b> <sup>1</sup> H NMR spectrum of W(NAr)(NH <sub>2</sub> )(OR <sub>F9</sub> ) <sub>2</sub> (C <sub>2</sub> H <sub>4</sub> ).                                                   |           |
| <b>Figure S6.</b> <sup>13</sup> C NMR spectrum of W(NAr)(NH <sub>2</sub> Ar)(OR <sub>F9</sub> ) <sub>2</sub> (C <sub>2</sub> H <sub>4</sub> ).                                                |           |
| <b>Figure S7.</b> <sup>19</sup> F NMR spectrum of W(NAr)(NH <sub>2</sub> Ar)(OR <sub>F9</sub> ) <sub>2</sub> (C <sub>2</sub> H <sub>4</sub> ).                                                |           |
| <b>Figure S8.</b> <sup>1</sup> H-COSY spectrum W(NAr)(NH <sub>2</sub> Ar)(OR <sub>F9</sub> ) <sub>2</sub> (C <sub>2</sub> H <sub>4</sub> ).                                                   |           |
| <b>Figure S9.</b> The aliphatic area of the HSQC { <sup>1</sup> H; <sup>13</sup> C} spectrum of W(NAr)(NH <sub>2</sub> Ar)(OR <sub>F9</sub> ) <sub>2</sub> (C <sub>2</sub> H <sub>4</sub> ).  |           |
| <b>Figure S10.</b> <sup>1</sup> H NMR spectrum of W(NAr)(Ar'NH)(ArNH <sub>2</sub> )(OR <sub>F9</sub> ).                                                                                       |           |
| <b>Figure S11.</b> <sup>13</sup> C NMR spectrum of W(NAr)(Ar'NH)(ArNH <sub>2</sub> )(OR <sub>F9</sub> ).                                                                                      |           |
| <b>Figure S12.</b> <sup>19</sup> F NMR spectrum of W(NAr)(Ar'NH)(ArNH <sub>2</sub> )(OR <sub>F9</sub> ).                                                                                      |           |
| <b>Figure S13.</b> <sup>1</sup> H-COSY spectrum W(NAr)(Ar'NH)(ArNH <sub>2</sub> )(OR <sub>F9</sub> ).                                                                                         |           |
| <b>Figure S14.</b> The aliphatic area of the HSQC { <sup>1</sup> H; <sup>13</sup> C} spectrum of W(NAr)(Ar'NH)(ArNH <sub>2</sub> )(OR <sub>F9</sub> ).                                        |           |
| <b>Figure S15.</b> <sup>1</sup> H NMR spectrum of W(NAr)(OR <sub>F6</sub> ) <sub>2</sub> (C <sub>2</sub> H <sub>4</sub> )(ArNH <sub>2</sub> ).                                                |           |
| <b>Figure S16.</b> <sup>13</sup> C NMR spectrum of W(NAr)(OR <sub>F6</sub> ) <sub>2</sub> (C <sub>2</sub> H <sub>4</sub> )(ArNH <sub>2</sub> ).                                               |           |
| <b>Figure S17.</b> <sup>19</sup> F NMR spectrum of W(NAr)(OR <sub>F6</sub> ) <sub>2</sub> (C <sub>2</sub> H <sub>4</sub> )(ArNH <sub>2</sub> ).                                               |           |
| <b>Figure S18.</b> <sup>1</sup> H-COSY spectrum W(NAr)(OR <sub>F6</sub> ) <sub>2</sub> (C <sub>2</sub> H <sub>4</sub> )(ArNH <sub>2</sub> ).                                                  |           |
| <b>Figure S19.</b> The aliphatic area of the HSQC { <sup>1</sup> H; <sup>13</sup> C} spectrum of W(NAr)(OR <sub>F6</sub> ) <sub>2</sub> (C <sub>2</sub> H <sub>4</sub> )(ArNH <sub>2</sub> ). |           |
| <b>Figure S20.</b> <sup>1</sup> H NMR spectrum of W(NAr)(OR <sub>F3</sub> ) <sub>2</sub> (C <sub>2</sub> H <sub>4</sub> )(ArNH <sub>2</sub> ).                                                |           |
| <b>Figure S21.</b> <sup>13</sup> C NMR spectrum of W(NAr)(OR <sub>F3</sub> ) <sub>2</sub> (C <sub>2</sub> H <sub>4</sub> )(ArNH <sub>2</sub> ).                                               |           |
| <b>Figure S22.</b> <sup>19</sup> F NMR spectrum of W(NAr)(OR <sub>F3</sub> ) <sub>2</sub> (C <sub>2</sub> H <sub>4</sub> )(ArNH <sub>2</sub> ).                                               |           |
| <b>Figure S23.</b> <sup>1</sup> H-COSY spectrum W(NAr)(OR <sub>F3</sub> ) <sub>2</sub> (C <sub>2</sub> H <sub>4</sub> )(ArNH <sub>2</sub> ).                                                  |           |
| <b>Figure S24.</b> The aliphatic area of HSQC { <sup>1</sup> H; <sup>13</sup> C} spectrum of W(NAr)(OR <sub>F3</sub> ) <sub>2</sub> (C <sub>2</sub> H <sub>4</sub> )(ArNH <sub>2</sub> ).     |           |
| <b>Figure S25.</b> <sup>1</sup> H NMR spectra of the W(NAr)(py)[(μ-NAr')(μ-NHAr'')]W(NAr)(OR <sub>F9</sub> )                                                                                  |           |
| <b>Figure S26.</b> <sup>13</sup> C NMR spectra of the W(NAr)(py)[(μ-NAr')(μ-NHAr'')]W(NAr)(OR <sub>F9</sub> )                                                                                 |           |
| <b>Figure S27.</b> <sup>19</sup> F NMR spectra of the W(NAr)(py)[(μ-NAr')(μ-NHAr'')]W(NAr)(OR <sub>F9</sub> )                                                                                 |           |
| <b>Figure S28.</b> <sup>1</sup> H COSY spectra of the W(NAr)(py)[(μ-NAr')(μ-NHAr'')]W(NAr)(OR <sub>F9</sub> )                                                                                 |           |
| <b>Figure S29.</b> HSQC { <sup>1</sup> H, <sup>13</sup> C} spectra of the W(NAr)(py)[(μ-NAr')(μ-NHAr'')]W(NAr)(OR <sub>F9</sub> )                                                             |           |
| <b>Figure S30.</b> DOSY NMR spectra of the W(NAr)(py)[(μ-NAr')(μ-NHAr'')]W(NAr)(OR <sub>F9</sub> )                                                                                            |           |

**Figure S31.** Aliphatic area of DOSY NMR spectra of the  $W(NAr)(py)[(\mu-NAr')(\mu-NHAr'')]W(NAr)(OR_{F9})$

## Mechanistic Experiments

S22

**Figure S32.**  $^1H$  NMR spectra of  $W(NAr)(ArNH_2)(OR_{F9})_2(C_2H_4)$  after 10 min, 24 h, and 40 h.

**Figure S33.**  $^1H$  NMR spectra of  $W(NAr)(ArNH_2)(OR_{F9})_2(C_2H_4)$  after 40 h and a pure sample of  $W(NAr)(ArNH)(ArNH_2)(OR_{F9})$ .

**Figure S34.** Quantification of products in Figure S32.

**Figure S35.** The  $^1H$ -COSY spectrum of the products in Figure S32.

**Figure S36.**  $^1H$  NMR spectra of  $W(NAr)(ArNH_2)(OR_{F9})_2(C_2H_4)$  after addition of  $B(C_6F_5)_3$ .

**Figure S37.**  $^{19}F$  NMR spectra of  $W(NAr)(ArNH_2)(OR_{F9})_2(C_2H_4)$  after 10 min of addition of  $B(C_6F_5)_3$ .

**Figure S38.**  $^1H$  NMR spectra of  $W(NAr)(OR_{F9})_2(C_2H_4)$  in  $C_6D_6$  after 10 min and 20 h.

**Figure S39.**  $^{19}F$  NMR spectra of  $W(NAr)(OR_{F9})_2(C_2H_4)$  after 10 min and 20 h.

**Figure S40.**  $^1H$  NMR spectra of  $W(NAr)(ArNH_2)(OR_{F9})_2(C_2H_4)$  after addition of ethylene.

**Figure S41.**  $^{19}F$  NMR spectra of  $W(NAr)(ArNH_2)(OR_{F9})_2(C_2H_4)$  after addition of ethylene.

**Figure S42.**  $^1H$  NMR spectra of  $W(NAr)(ArNH_2)(OR_{F9})_2(C_2H_4)$  after addition of ethylene.

**Figure S43.** The Aliphatic area of the COSY spectrum of the mixture in Figure S42.

**Figure S44.** The aliphatic area of the HSQC  $\{^1H, ^{13}C\}$  spectrum of the mixture in Figure S42.

**Figure S45.**  $^{13}C$  NMR spectrum of mixture of the mixture in Figure S42.

**Figure S46.**  $^1H$  NMR spectra of  $W(NAr)(OR_{F9})_2(C_2H_4)$  after addition of ethylene.

**Figure S47.**  $^{19}F$  NMR spectra of  $W(NAr)(OR_{F9})_2(C_2H_4)$  after 10 min of addition of ethylene.

**Figure S48.**  $^1H$  NMR spectra of formation of  $W(NAr)(OR_{F9})_2(C_2H_4)$  and  $W(NAr)(OR_{F9})_2(C_4H_8)$  from  $W(NAr)(OR_{F9})_2(C_4H_8)$ .

**Figure S49.**  $^1H$  NMR spectra of  $W(NAr)_2Et_2$  after successive addition of  $R_{F9}OH$  and  $C_2H_4$ .

**Figure S50.**  $^1H$  NMR spectra showing the slow formation of 1-butene from ethylene by  $W(NAr)(OR_{F9})_2(C_4H_8)$ .

**Figure S51.**  $^1H$  NMR spectra of  $W(NAr)(C_4H_8)(OR_{F9})_2$  after LED for 12 h under ethylene.

**Figure S52.**  $^1H$  NMR spectra showing solution stability of  $W(NAr)(ArNH_2)(OR_{F6})_2(C_2H_4)$

**Figure S53.**  $^1H$  NMR spectra of  $W(NAr)(ArNH_2)(OR_{F6})_2(C_2H_4)$  after addition of ethylene

**Figure S54.**  $^{13}C$  NMR spectrum of the mixture in Figure S52.

**Figure S55.**  $^{19}F$  NMR spectra of the mixture in Figure S52.

**Figure S56.** The aliphatic area of the COSY spectrum of the mixture in Figure S52.

**Figure S57.** The aliphatic area of HSQC  $\{^1H, ^{13}C\}$  spectrum of the mixture in Figure S52.

**Figure S58.**  $^1H$  NMR spectra of the mixture in Figure S45 after LED irradiation ( $\lambda=450$  nm) for 12 h under ethylene.

**Figure S59.**  $^{19}F$  NMR spectra of the mixture in Figure S57

**Figure S60.** The aliphatic area of COSY spectrum of the mixture in Figure S57.

**Figure S61.** The aliphatic area of the HSQC  $\{^1H, ^{13}C\}$  spectrum of the mixture in Figure S57.

**Figure S62.**  $^1H$  NMR spectra of  $W(NAr)(ArNH_2)(OR_{F3})_2(C_2H_4)$  after addition of ethylene.

**Figure S63.**  $^{19}F$  NMR spectra of the sample in Figure S61.

**Figure S64.**  $^{13}C$  NMR spectrum of the sample in Figure S61.

**Figure S65.** The aliphatic area of the COSY spectrum of the sample in Figure S61.

**Figure S66.** The aliphatic area of the HSQC  $\{^1H, ^{13}C\}$  spectrum of the sample in Figure S61.

**Figure S67.**  $^1H$  NMR spectra of  $W(NAr)(ArNH_2)(OR_{F9})_2(C_4H_8)$  after addition of  $ArNH_2$ .

**Figure S68.**  $^1H$  NMR spectra of  $W(NAr)(ArNH_2)(OR_{F9})_2(C_4H_8)$  after addition of 2,6-lutidine.

**Figure S69.**  $^1H$  NMR spectra of the sample in Figure S60.

**Figure S70.**  $^1H$  NMR spectra showing of the reaction of  $W(NAr)(ArNH_2)(OR_{F9})_2(C_4H_8)$  with cyclohexene.

**Figure S71.**  $^1H$  NMR spectra of the reaction of  $W(NAr)(OR_{F9})_2(C_4H_8)$  with cyclohexene.

**Figure S72.**  $^1H$  NMR spectra showing of  $W(NAr)(ArNH)(ArNH_2)(OR_{F9})$  after addition of ethylene.

**Figure S73.**  $^1H$  NMR spectra of the mixture in Figure 71.

**Figure S74.** The aliphatic area of the COSY spectrum of the mixture in Figure 71.

**Figure S75.** The aliphatic area of HSQC  $\{^1H, ^{13}C\}$  spectrum of the mixture in Figure 71.

**Figure S76.**  $^{13}C$  NMR spectrum of the mixture in Figure 64.

**Figure S77.**  $^1H$  NMR spectra of formation of  $W(NAr)(ArNH_2)(OR_{F9})_2(C_2H_4)$  in absence of ethylene.

**Figure S78.**  $^1H$  NMR spectra of the reaction of  $W(NAr)(ArNH)(ArNH_2)(OR_{F9})$  with cyclohexene.

**Figure S79.**  $^1\text{H}$  NMR spectra of the reaction of  $\text{W}(\text{NAr})(\text{Ar}'\text{NH})(\text{ArNH}_2)(\text{OR}_{\text{F9}})$  with cyclohexene at 100 °C.

**Figure S80.** The aliphatic area of HSQC  $\{^1\text{H}, ^{13}\text{C}\}$  spectrum of the mixture in Figure 78

**Figure S81.** The aliphatic area of HMBC  $\{^1\text{H}, ^{13}\text{C}\}$  spectrum of the mixture in Figure 78.

**Figure S82.**  $^{13}\text{C}$  NMR spectrum of the mixture in Figure 78.

### 3. Syntheses of other ethylene complexes

S49

**Figure S83.**  $^1\text{H}$  NMR spectra of the reaction of  $\text{W}(\text{NAr})(\text{CHMe}_2\text{Ph})(\text{OTf})_2(\text{dme})$  with ethylene.

**Figure S84.**  $^{19}\text{F}$  NMR spectra of  $\text{W}(\text{NAr})(\text{C}_2\text{H}_4)(\text{OTf})_2(\text{dme})$ .

**Figure S85.**  $^{13}\text{C}$  NMR spectra of  $\text{W}(\text{NAr})(\text{C}_2\text{H}_4)(\text{OTf})_2(\text{dme})$ .

**Figure S86.**  $^1\text{H}$  COSY NMR spectra of  $\text{W}(\text{NAr})(\text{C}_2\text{H}_4)(\text{OTf})_2(\text{dme})$ .

### 4. X-ray Crystallography

S51

**Figure S87.** Thermal ellipsoid plot of  $\text{W}(\text{NAr})_2\text{Et}_2$ .

**Figure S88.** Thermal ellipsoid plot of  $\text{W}(\text{NAr})(\text{OR}_{\text{F9}})_2(\text{C}_2\text{H}_4)(\text{ArNH}_2)$ .

**Figure S89.** Thermal ellipsoid plot of  $\text{W}(\text{NAr})(\text{Ar}'\text{NH})(\text{ArNH}_2)(\text{OR}_{\text{F9}})$ .

**Figure S90.** Thermal ellipsoid plot of  $\text{W}(\text{NAr})(\text{C}_4\text{H}_8)(\text{OR}_{\text{F9}})_2$ .

**Figure S91.** Thermal ellipsoid plot of  $\text{W}(\text{NAr})(\text{C}_3\text{H}_6)(\text{OR}_{\text{F9}})_2$ .

**Figure S92.** Thermal ellipsoid plot of  $\text{W}(\text{NAr})(\text{py})[(\mu\text{-NAr}')(\mu\text{-NHAr}'')]\text{W}(\text{NAr})(\text{OR}_{\text{F9}})$

### 5. References

S59

#### 1. General Considerations

Unless otherwise stated, all manipulations were carried out using standard Schlenk or glovebox techniques under an  $\text{N}_2$  atmosphere. Pentane, diethyl ether, dichloromethane, benzene and toluene were dried and deoxygenated by argon purge followed by passage through activated alumina in a solvent purification system followed by storage over 4 Å molecular sieves. Non-halogenated and non-nitrile containing solvents were tested with a standard purple solution of sodium benzophenone ketyl in THF to confirm effective oxygen and moisture removal prior to use.  $\text{W}(\text{NAr})_2\text{Cl}_2(\text{DME})$  was prepared according to reported procedure.<sup>1</sup> Perfluoro-*t*-butanol and hexafluoro-*t*-butanol were purchased from Oakwood chemical and Alfa chemical respectively and stored over activated 4 Å molecular sieves. 1,4-TMS benzene, Isopropyl magnesium chloride and *n*-propyl magnesium chloride were purchased from Sigma-Aldrich;  $\text{B}(\text{C}_6\text{F}_5)_3$  was purchased from Alfa chemical and sublimed before use. Elemental analyses were performed by Atlantic Microlab, Inc., Norcross, GA. Deuterated solvents were purchased from Cambridge Isotope Laboratories Inc., degassed, and dried over activated 4 Å molecular sieves for at least 24 h prior to use. NMR spectra were recorded on Bruker Avance 600 MHz and Bruker Avance 500 MHz spectrometers.  $^1\text{H}$  and  $^{13}\text{C}$  chemical shifts are reported in ppm relative to tetramethylsilane using residual solvent as an internal standard.  $^{19}\text{F}$  chemical shifts are reported in ppm relative to trichlorofluoromethane as an external standard.

#### 2. NMR spectra

**$\text{W}(\text{NAr})_2\text{Et}_2$ .**  $^1\text{H}$  NMR (600 MHz,  $\text{C}_6\text{D}_6$ , 298K):  $\delta$  7.07 (d,  $J$  = 7.6 Hz, 4H), 6.97 (t,  $J$  = 7.6 Hz, 2H), 3.66 (sept,  $J$  = 6.9 Hz, 4H), 2.11 (q,  $J$  = 8.0 Hz, 4H), 1.58 (t,  $J$  = 8.0 Hz, 6H), 1.18 (d,  $J$  = 6.9 Hz, 24H).  $^{13}\text{C}\{^1\text{H}\}$  NMR (151 MHz,  $\text{C}_6\text{D}_6$ , 298K):  $\delta$  152.62, 142.28, 125.19, 122.52, 57.71, 28.72, 23.50, 10.70.

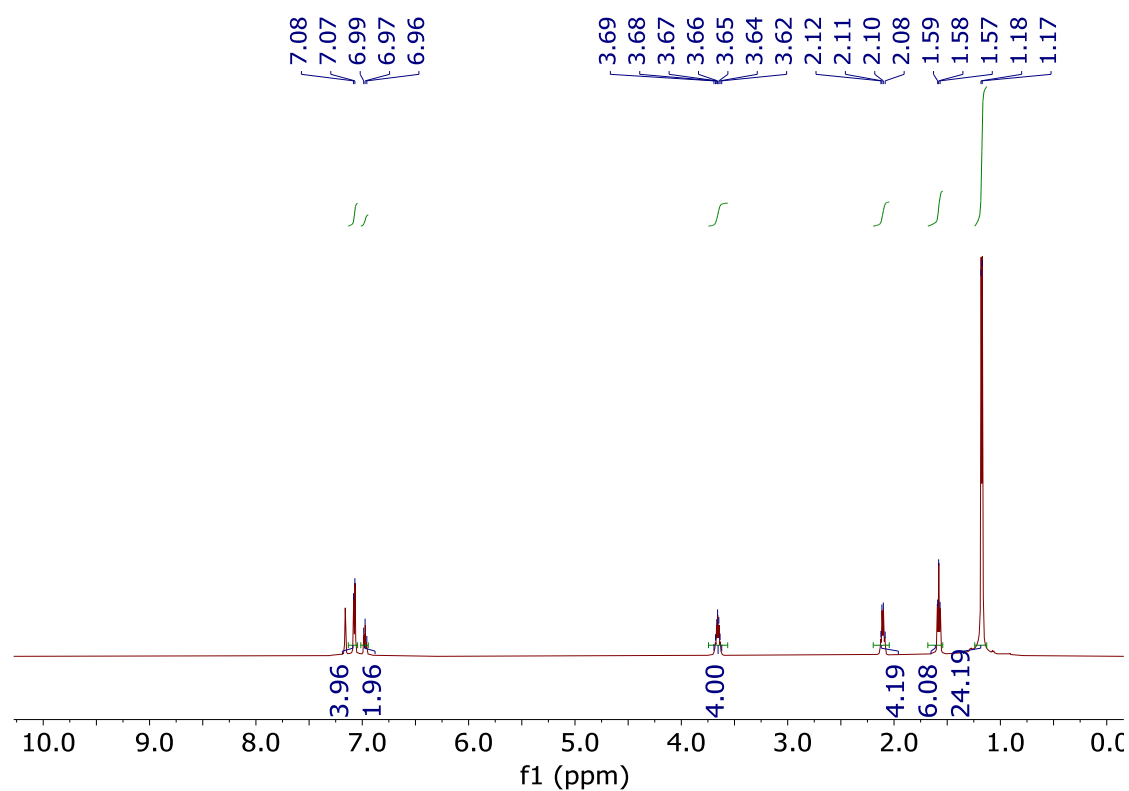

**Figure S1.** <sup>1</sup>H NMR spectrum of W(NAr)<sub>2</sub>Et<sub>2</sub> (600 MHz, 298K) in C<sub>6</sub>D<sub>6</sub>.

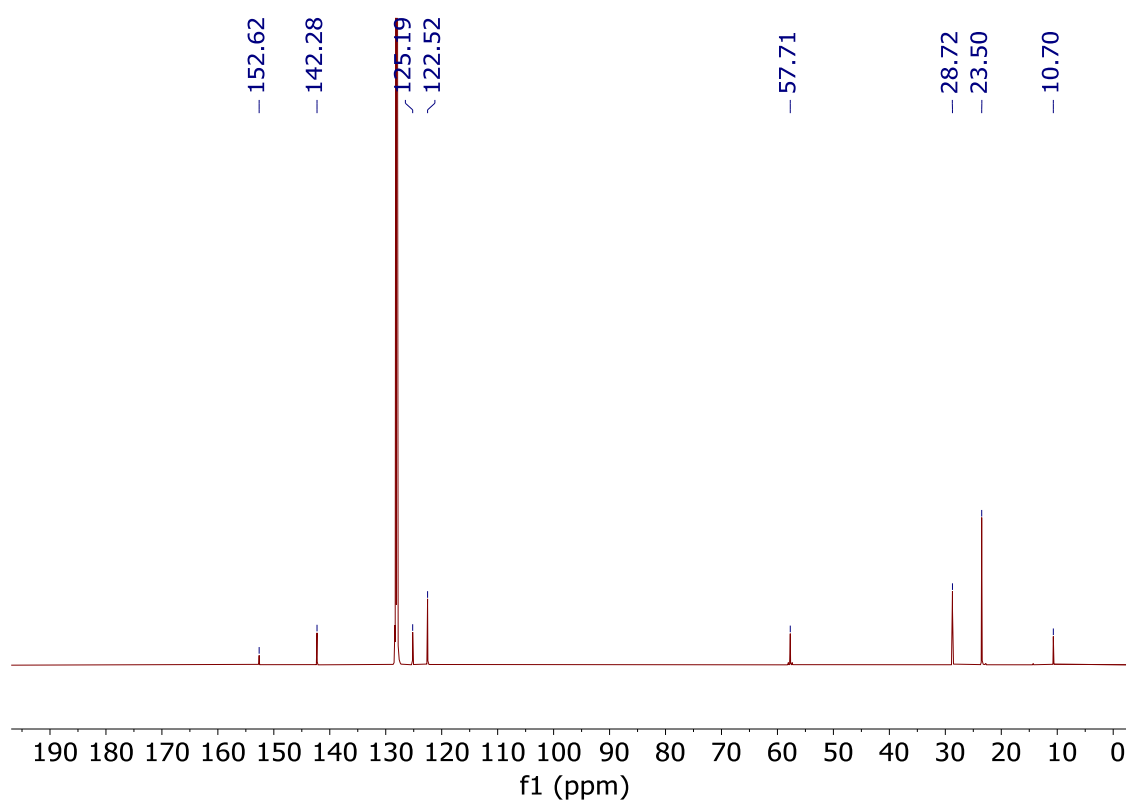

**Figure S2.** <sup>13</sup>C NMR spectrum of W(NAr)<sub>2</sub>Et<sub>2</sub> (151 MHz, 298K) in C<sub>6</sub>D<sub>6</sub>.

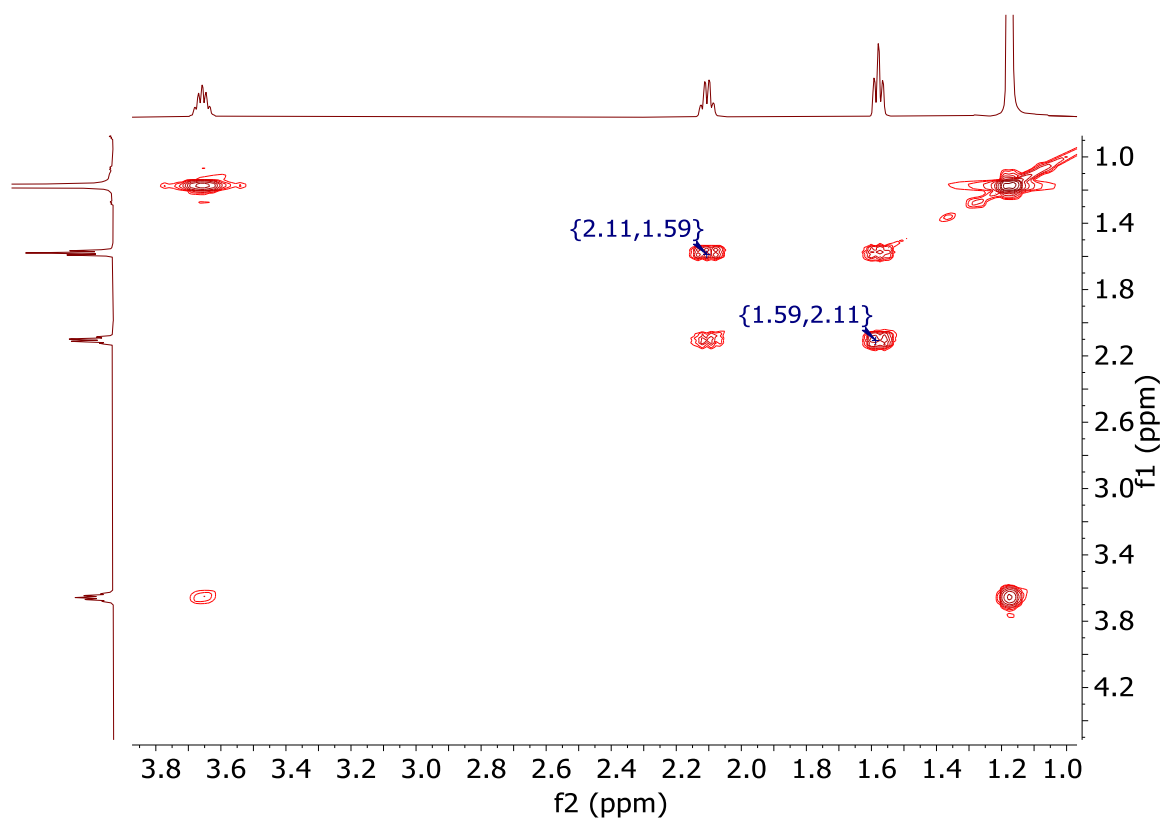

**Figure S3.**  $^1\text{H}$ -COSY spectrum  $\text{W}(\text{NAr})_2\text{Et}_2$  (600 MHz, 298K) in  $\text{C}_6\text{D}_6$ .

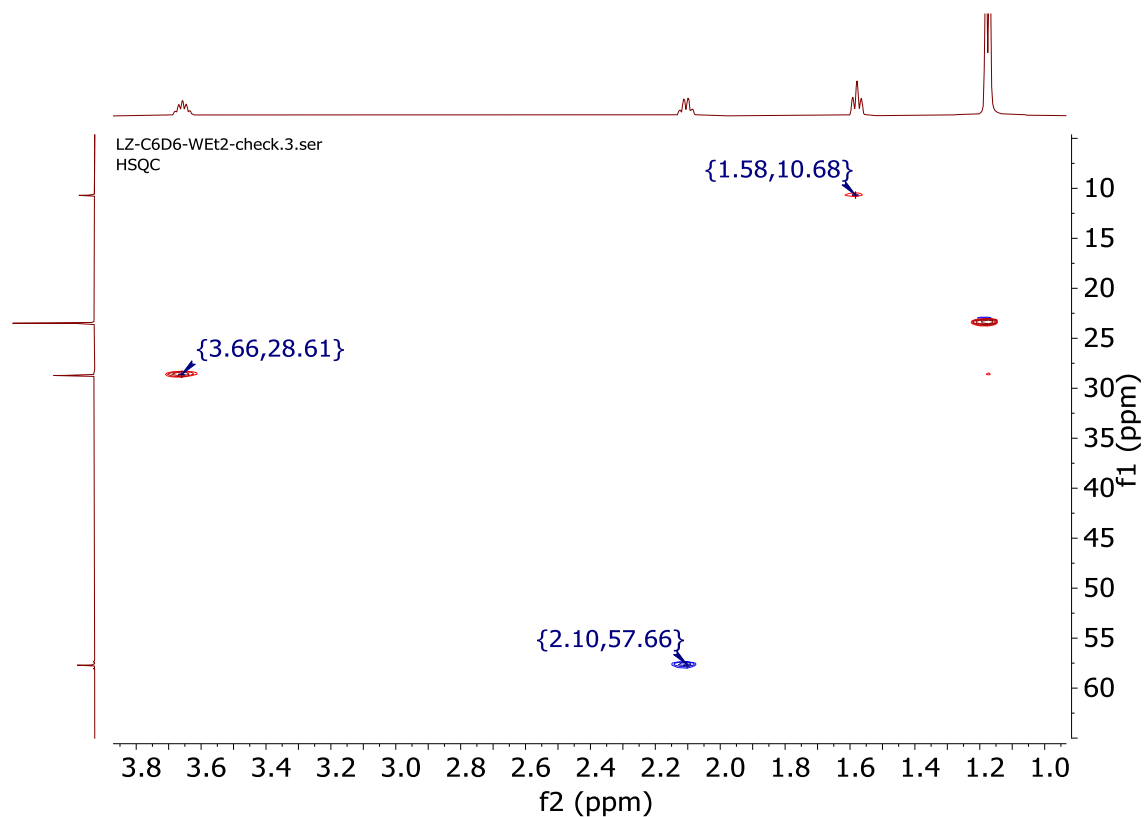

**Figure S4.** The aliphatic area of an HSQC  $\{^1\text{H}; ^{13}\text{C}\}$  spectrum of  $\text{W}(\text{NAr})_2\text{Et}_2$  (600 MHz, 298K) in  $\text{C}_6\text{D}_6$ .

**W(NAr)(OR<sub>F9</sub>)<sub>2</sub>(C<sub>2</sub>H<sub>4</sub>)(ArNH<sub>2</sub>).** <sup>1</sup>H NMR (600 MHz, C<sub>6</sub>D<sub>6</sub>, 298K): δ 7.06 (d, 2H), 6.94 (d, 3H), 6.91 (t, 1H), 3.53 (sept, 4H), 3.27 (s, 1H), 2.81 (s, 2H), 2.65 (sept, 2H), 1.13 (d, *J* = 6.5 Hz, 24H). <sup>13</sup>C NMR (151 MHz, C<sub>6</sub>D<sub>6</sub>, 298K): δ 152.05, 146.76, 128.97, 123.23, 123.05, 121.94, 59.37, 28.94, 28.13, 23.50, 22.64. <sup>19</sup>F NMR (564 MHz, C<sub>6</sub>D<sub>6</sub>, 298K): δ -73.65.

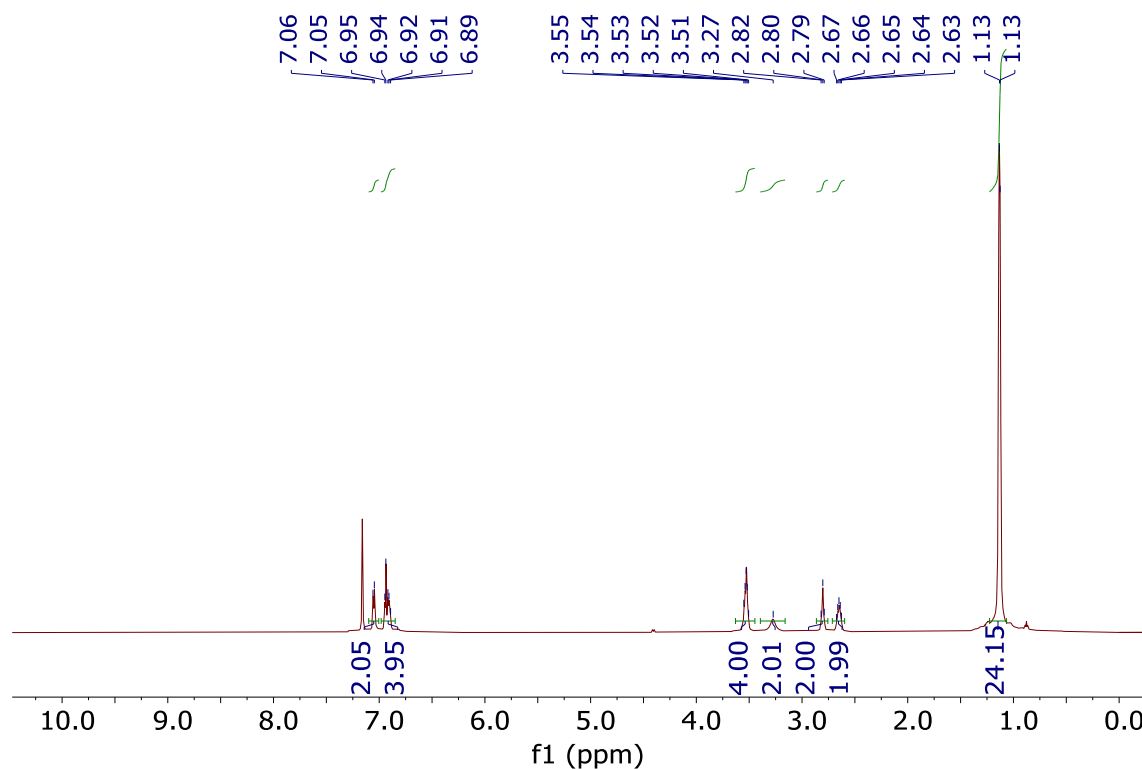

**Figure S5.** <sup>1</sup>H NMR spectrum of W(NAr)(NH<sub>2</sub>Ar)(OR<sub>F9</sub>)<sub>2</sub>(C<sub>2</sub>H<sub>4</sub>) (600 MHz, 298K) in C<sub>6</sub>D<sub>6</sub>.

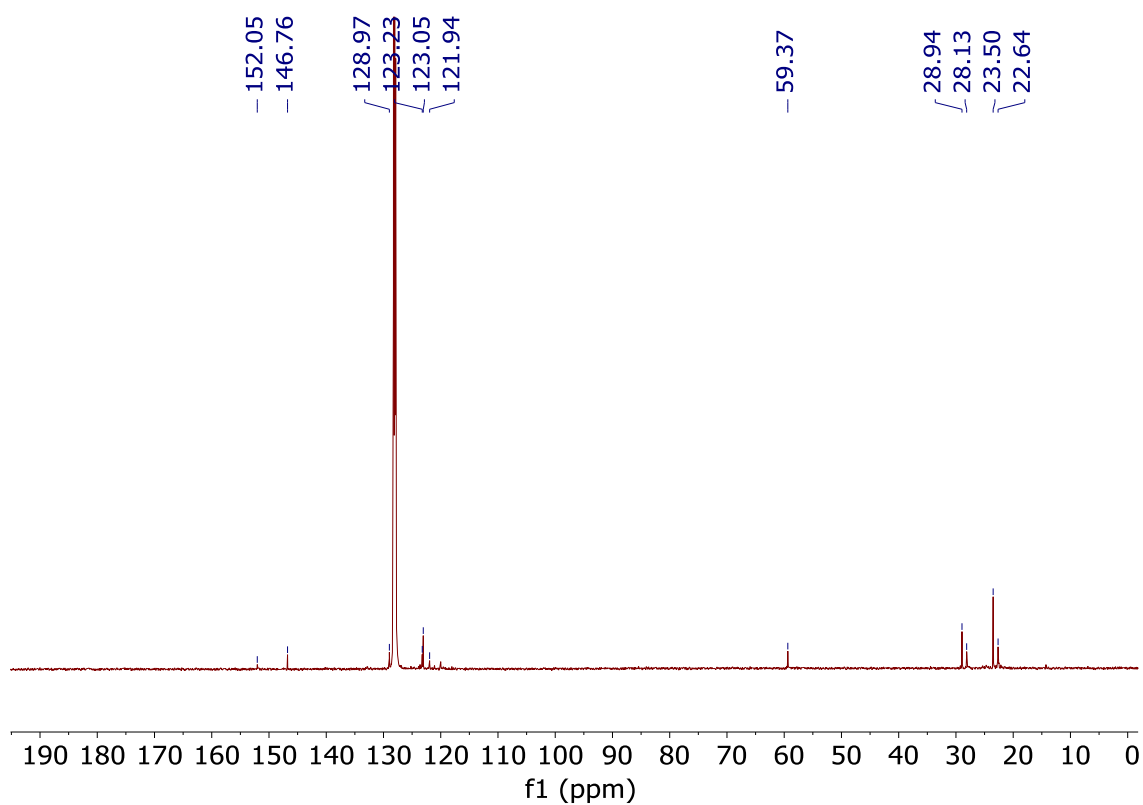

**Figure S6.** <sup>13</sup>C NMR spectrum of W(NAr)(NH<sub>2</sub>Ar)(OR<sub>F9</sub>)<sub>2</sub>(C<sub>2</sub>H<sub>4</sub>) (151 MHz, 298K) in C<sub>6</sub>D<sub>6</sub>.

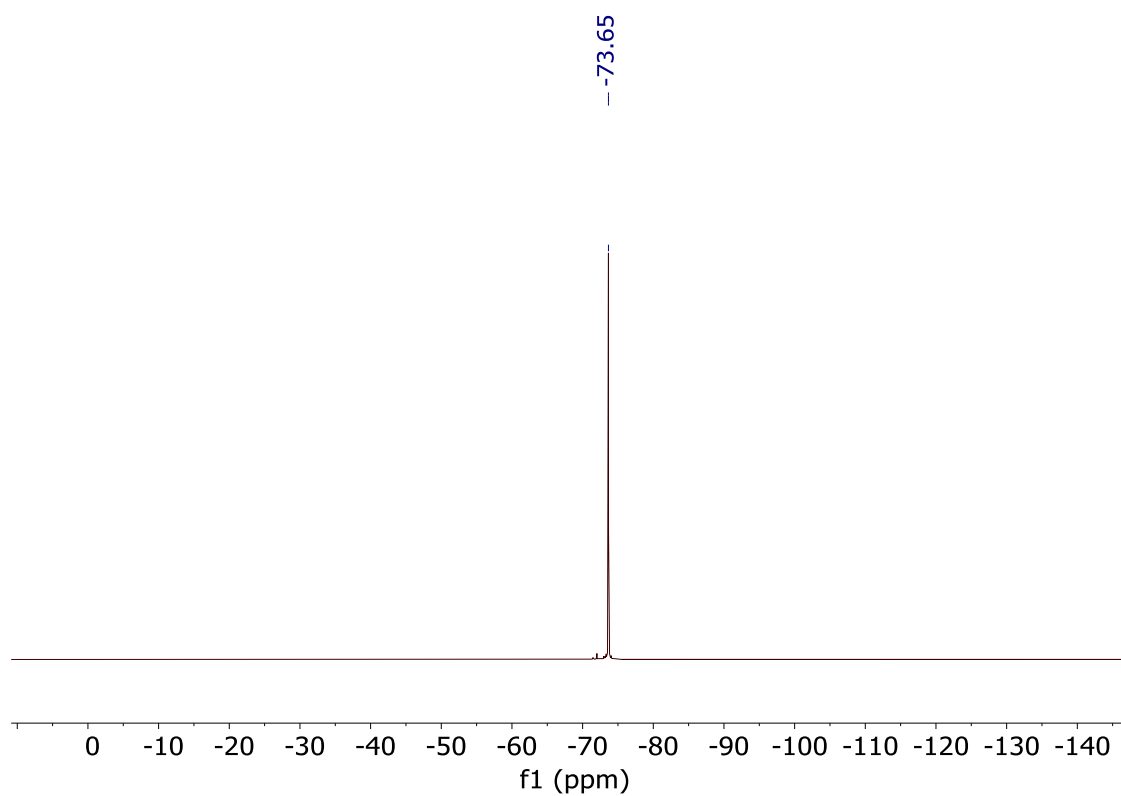

**Figure S7.** <sup>19</sup>F NMR spectrum of W(NAr)(NH<sub>2</sub>Ar)(OR<sub>F9</sub>)<sub>2</sub>(C<sub>2</sub>H<sub>4</sub>) (564 MHz, 298K) in C<sub>6</sub>D<sub>6</sub>.

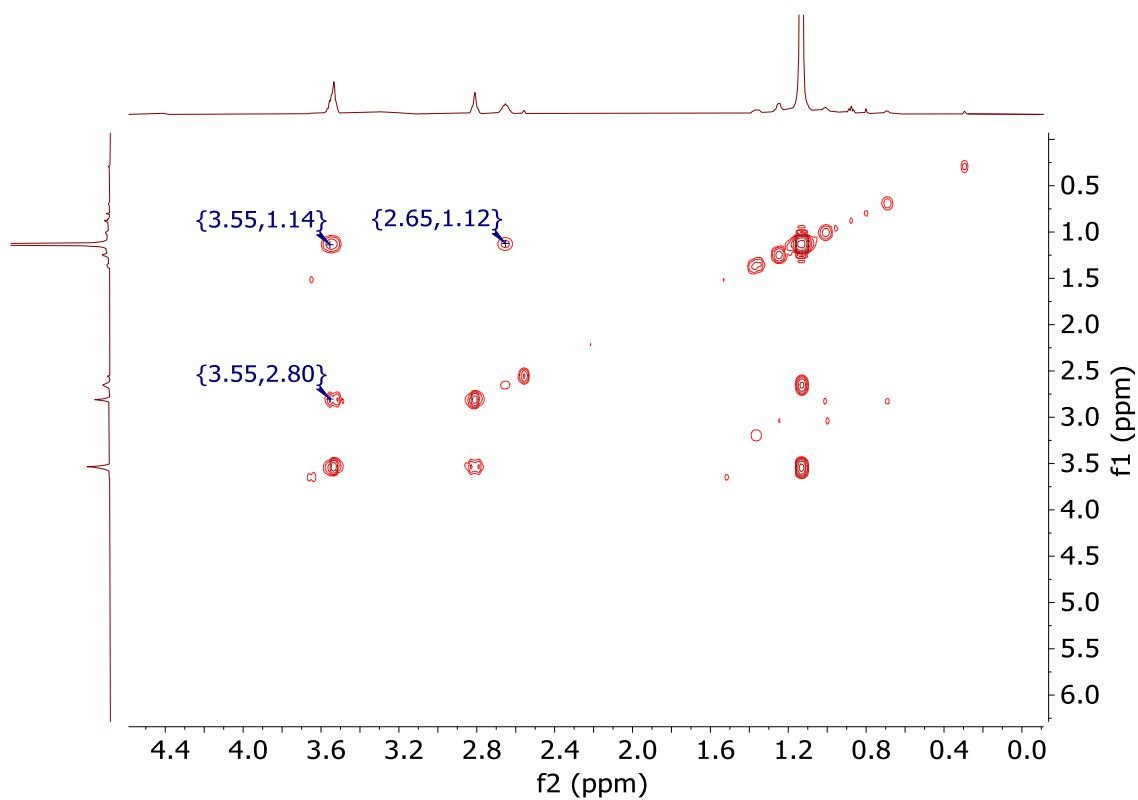

**Figure S8.**  $^1\text{H}$ -COSY spectrum  $\text{W}(\text{NAr})(\text{NH}_2\text{Ar})(\text{OR}_{\text{F9}})_2(\text{C}_2\text{H}_4)$  (600 MHz, 298K) in  $\text{C}_6\text{D}_6$ .

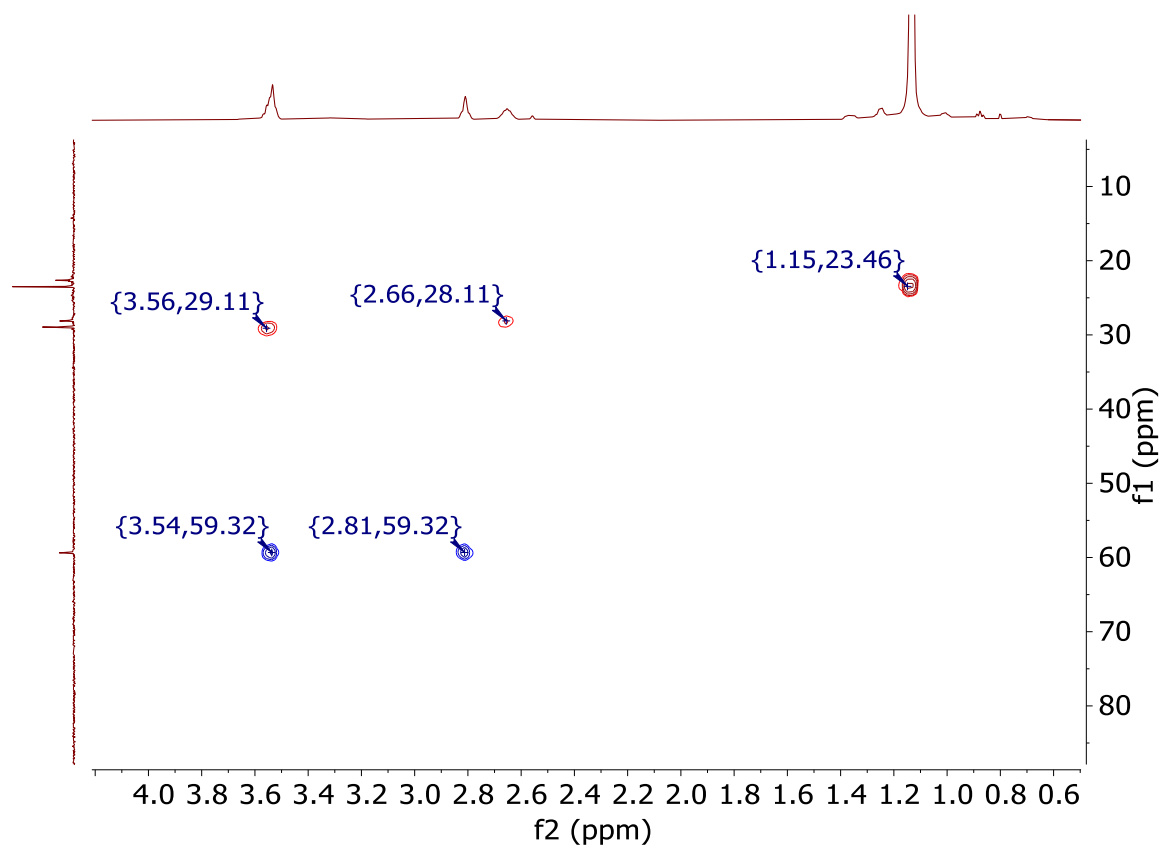

**Figure S9.** Aliphatic area of an HSQC{  $^1\text{H}$ ;  $^{13}\text{C}$  } spectrum of  $\text{W}(\text{NAr})(\text{NH}_2\text{Ar})(\text{OR}_{\text{F9}})_2(\text{C}_2\text{H}_4)$  (600 MHz, 298K) in  $\text{C}_6\text{D}_6$ .



**W(NAr')(ArNH)(ArNH<sub>2</sub>)(OR<sub>F9</sub>).** <sup>1</sup>H NMR (600 MHz, C<sub>6</sub>D<sub>6</sub>, 298K): δ 8.81 (s, 1H), 7.12 (d, *J* = 7.4 Hz, 1H), 7.04 – 6.98 (m, 4H), 6.91 – 6.89 (m, 3H), 6.74 (s, 1H), 5.94 (d, *J* = 12.1 Hz, 1H), 5.57 (d, *J* = 12.1 Hz, 1H), 3.82 (s, 1H), 3.74 (s, 1H), 3.66 (d, *J* = 8.1 Hz, 1H), 3.21 – 3.18 (m, 1H), 3.05 – 3.03 (m, 1H), 2.84 – 2.80 (m, 1H), 2.56 (s, 3H), 1.53 (d, *J* = 9.8 Hz, 1H), 1.38 – 1.36 (m, 9H), 1.25 – 1.24 (m, 9H), 1.01 – 0.96 (m, 12H), 0.69 (d, *J* = 6.9 Hz, 3H). <sup>13</sup>C{<sup>1</sup>H} NMR (151 MHz, C<sub>6</sub>D<sub>6</sub>, 298K): δ 158.40, 151.82, 147.51, 143.89, 140.18, 138.54, 132.92, 132.21, 127.11, 126.92, 125.22, 123.63, 123.21, 122.10, 121.09, 92.19, 85.45, 29.22, 28.92, 28.31, 28.03, 25.33, 24.71, 23.00, 22.49, 22.17, 22.09, 14.29. <sup>19</sup>F{<sup>1</sup>H} NMR (282 Hz, C<sub>6</sub>D<sub>6</sub>, 298K): δ –73.46 (s, 9F)

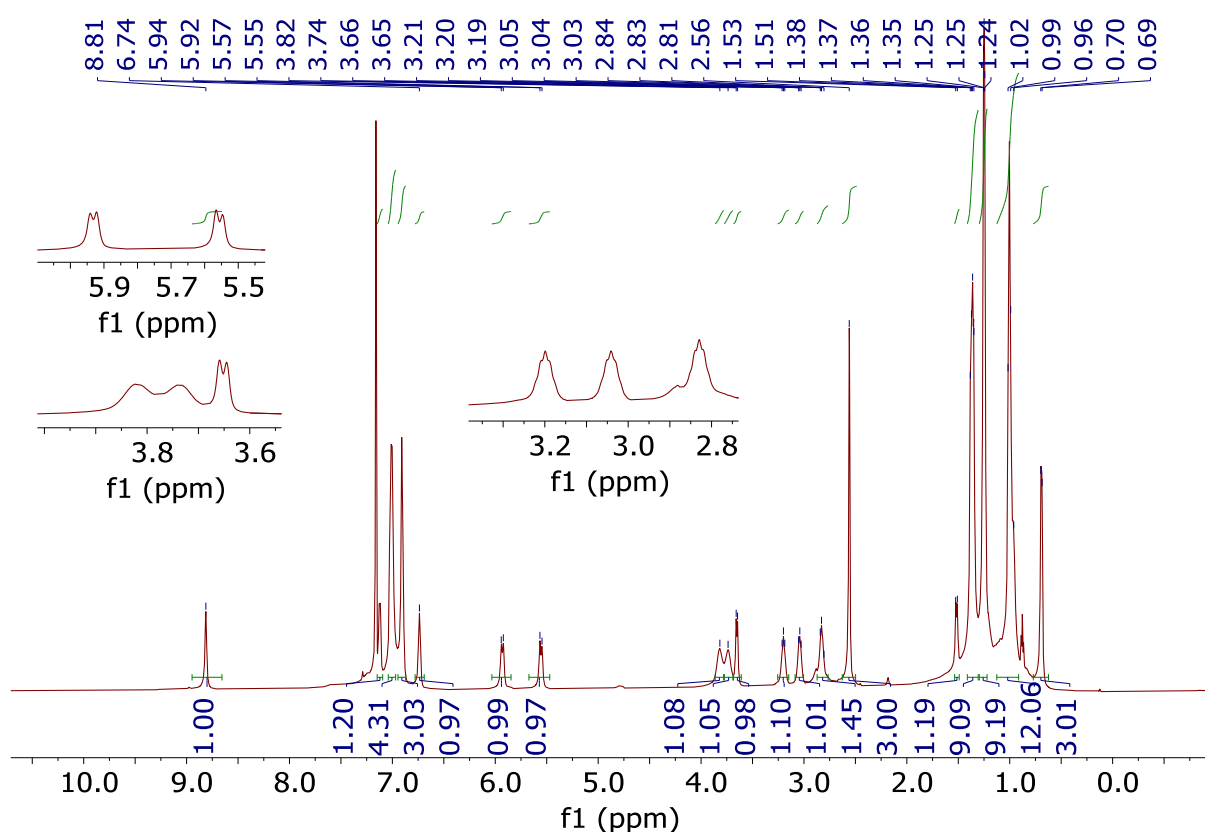

**Figure S10.** <sup>1</sup>H NMR spectrum of W(NAr')(ArNH)(ArNH<sub>2</sub>)(OR<sub>F9</sub>) (600 MHz, 298K) in C<sub>6</sub>D<sub>6</sub>.

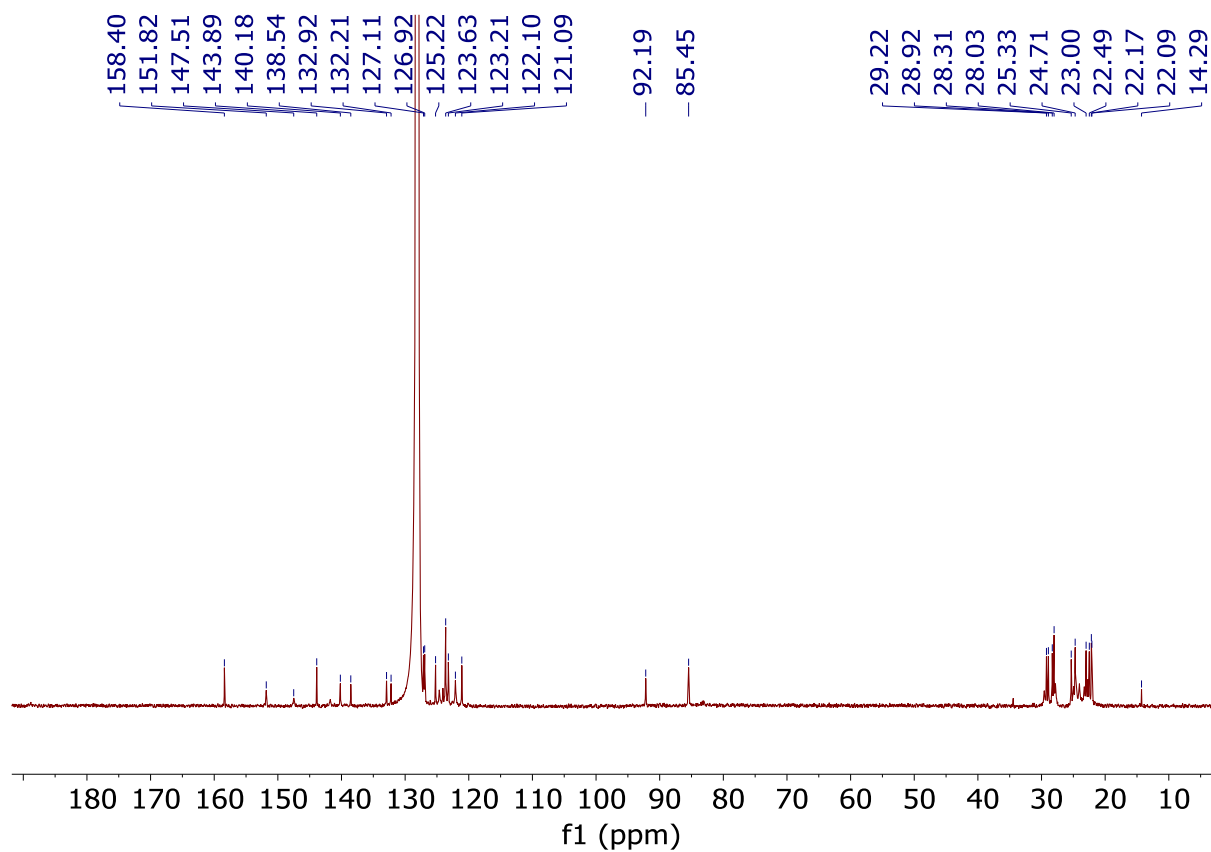

**Figure S11.** <sup>13</sup>C NMR spectrum of W(NAr)(Ar'NH)(ArNH<sub>2</sub>)(OR<sub>F9</sub>) (151 MHz, 298K) in C<sub>6</sub>D<sub>6</sub>.

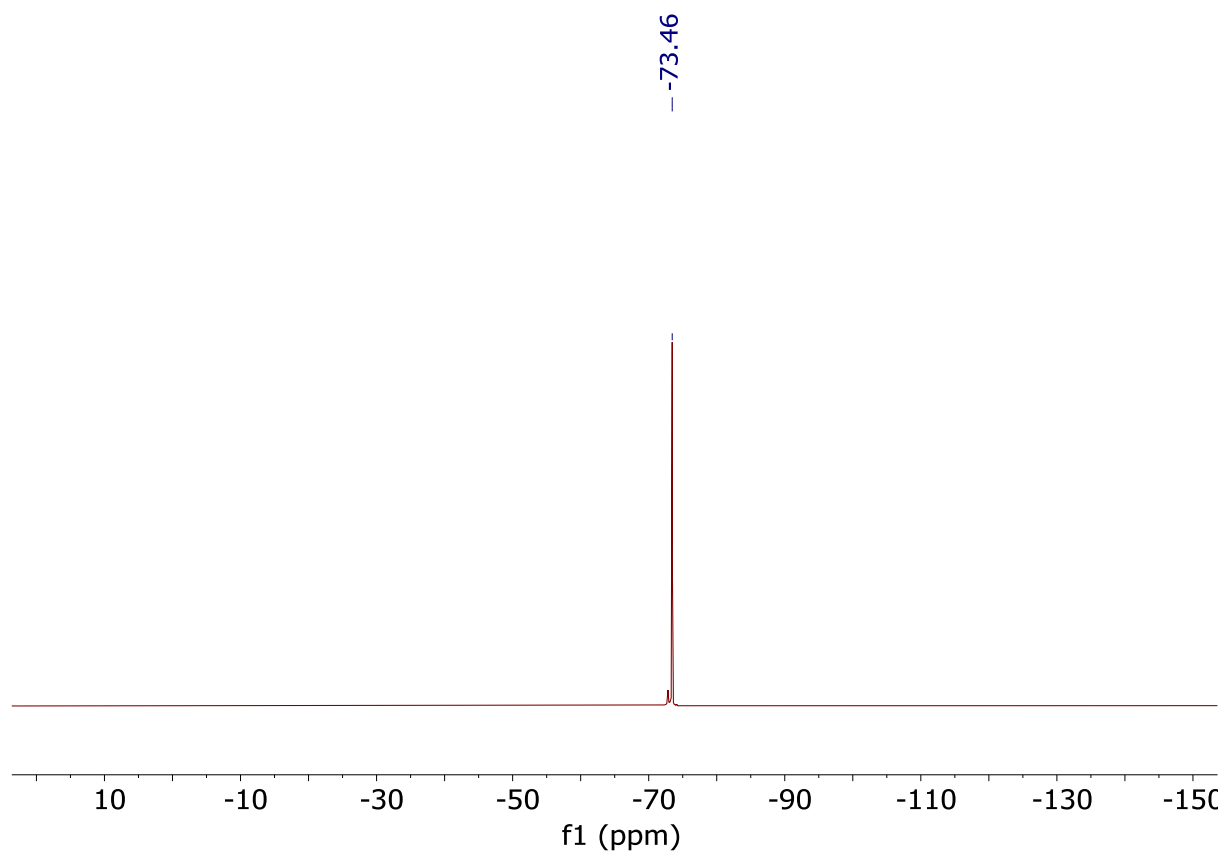

**Figure S12.** <sup>19</sup>F NMR spectrum of W(NAr)(Ar'NH)(ArNH<sub>2</sub>)(OR<sub>F9</sub>) (564 MHz, 298K) in C<sub>6</sub>D<sub>6</sub>.

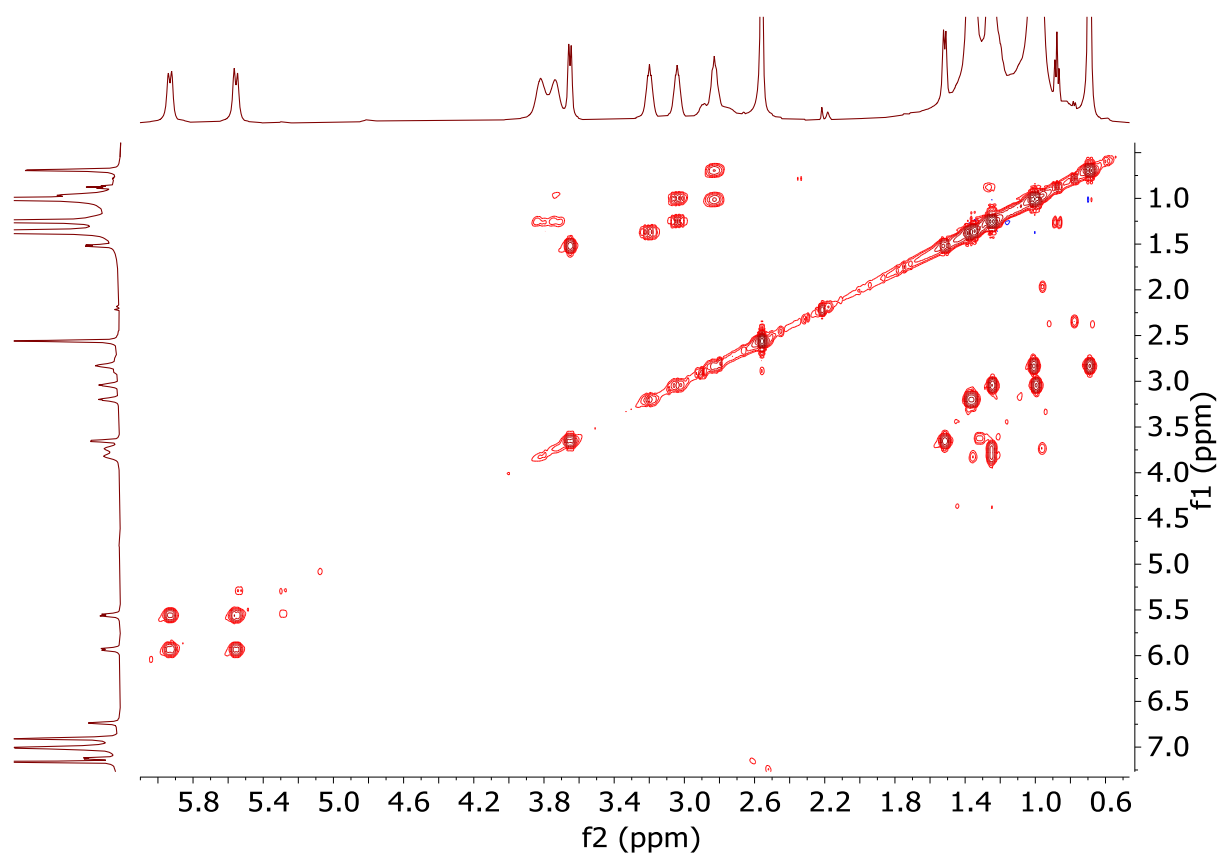

**Figure S13.**  $^1\text{H}$ -COSY spectrum  $\text{W}(\text{NAr})(\text{Ar}'\text{NH})(\text{ArNH}_2)(\text{OR}_{\text{F9}})$  (600 MHz, 298K) in  $\text{C}_6\text{D}_6$ .

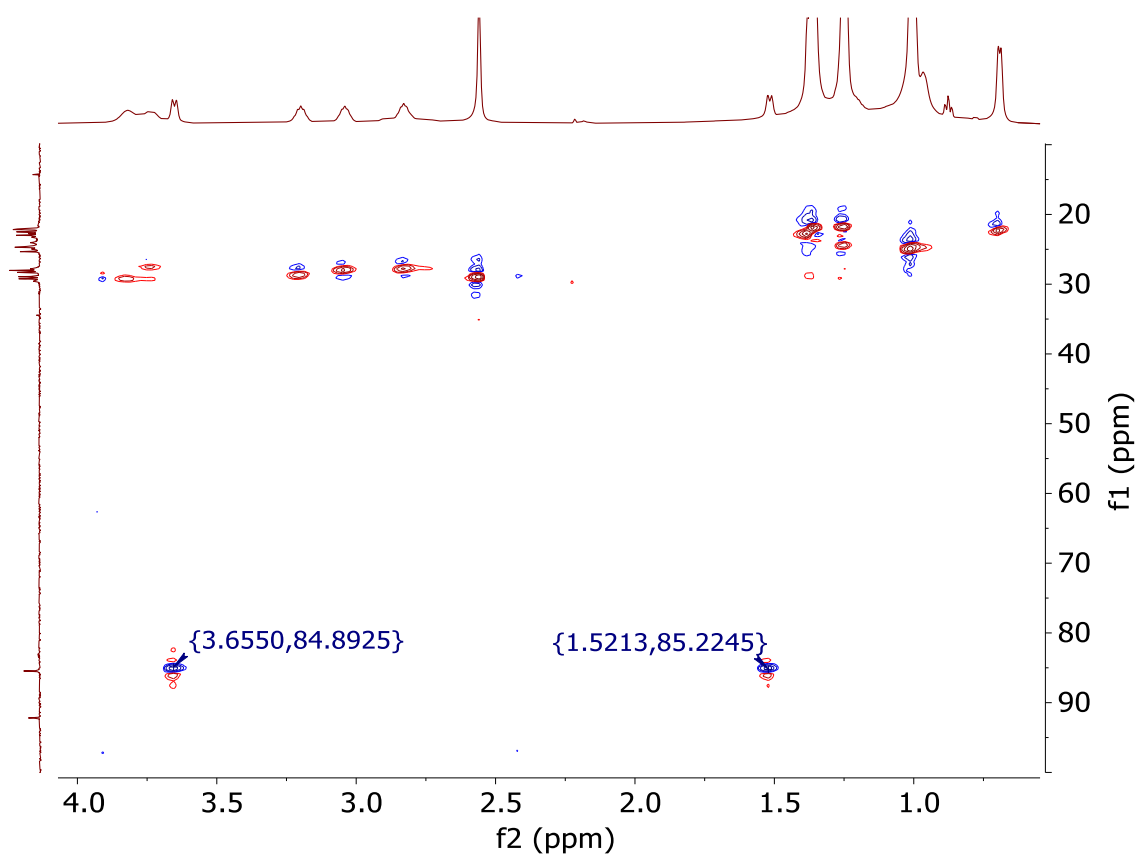

**Figure S14.** The Aliphatic area of HSQC  $\{^1\text{H}; ^{13}\text{C}\}$  spectrum of  $\text{W}(\text{NAr})(\text{Ar}'\text{NH})(\text{ArNH}_2)(\text{OR}_{\text{F9}})$  (600 MHz, 298K) in  $\text{C}_6\text{D}_6$ .

**W(NAr)(OR<sub>F6</sub>)<sub>2</sub>(C<sub>2</sub>H<sub>4</sub>)(ArNH<sub>2</sub>).** <sup>1</sup>H NMR (600 MHz, C<sub>6</sub>D<sub>6</sub>, 298K): δ 7.06 (d, *J* = 7.6 Hz, 2H), 6.98 – 6.95 (m, 3H), 6.91 (t, *J* = 7.6 Hz, 1H), 3.61 (sept, *J* = 6.9 Hz, 2H), 3.22 (br s, 2H, ArNH<sub>2</sub>), 3.20 – 3.14 (m, 2H), 2.64 (sept, *J* = 6.8 Hz, 2H), 2.35 – 2.26 (m, 2H), 1.33 (s, 6H), 1.17 (d, *J* = 6.9 Hz, 12H), 1.14 (d, *J* = 6.8 Hz, 12H). <sup>13</sup>C NMR (151 MHz, C<sub>6</sub>D<sub>6</sub>, 298K): δ 152.10, 145.82, 140.64, 132.39, 123.14, 122.96, 119.05, 83.62, 83.42, 83.23, 52.92, 28.75, 28.16, 23.54, 22.60, 18.25. <sup>19</sup>F NMR (282 MHz, C<sub>6</sub>D<sub>6</sub>, 298K): δ –77.14, –77.32.

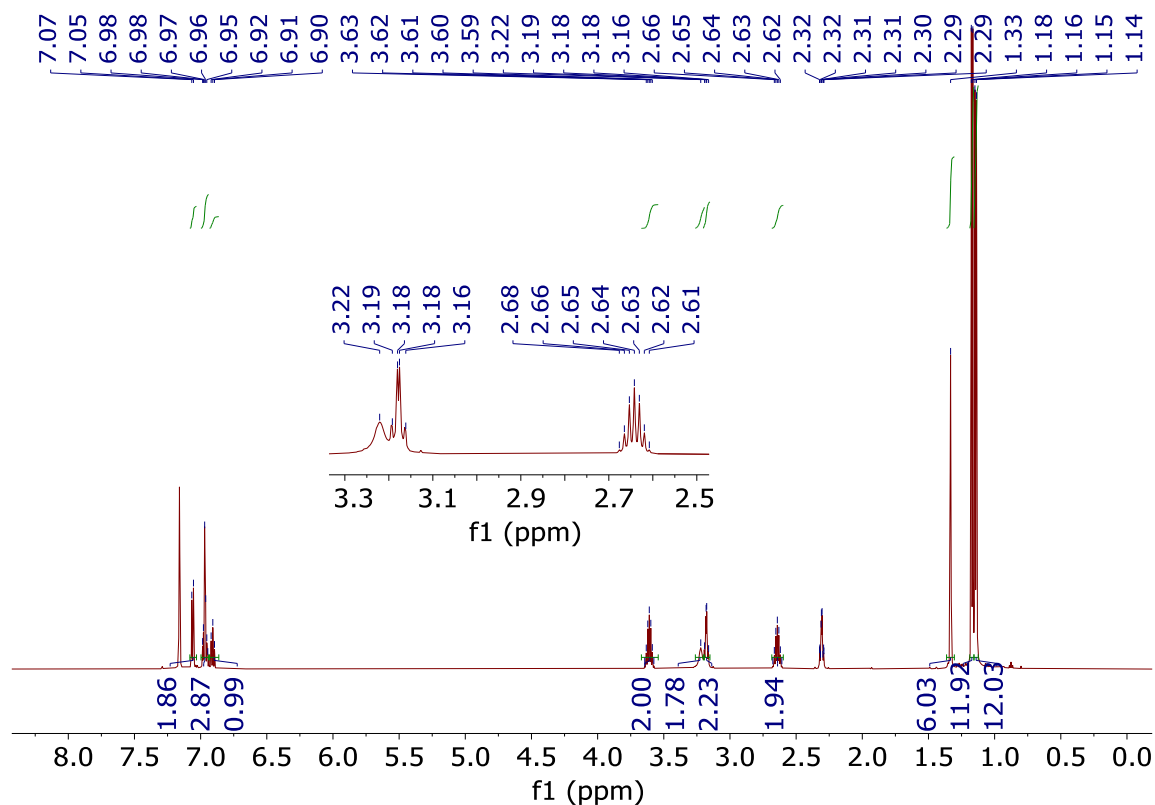

**Figure S15.** <sup>1</sup>H NMR spectrum of W(NAr)(OR<sub>F6</sub>)<sub>2</sub>(C<sub>2</sub>H<sub>4</sub>)(ArNH<sub>2</sub>) (600 MHz, 298K) in C<sub>6</sub>D<sub>6</sub>.

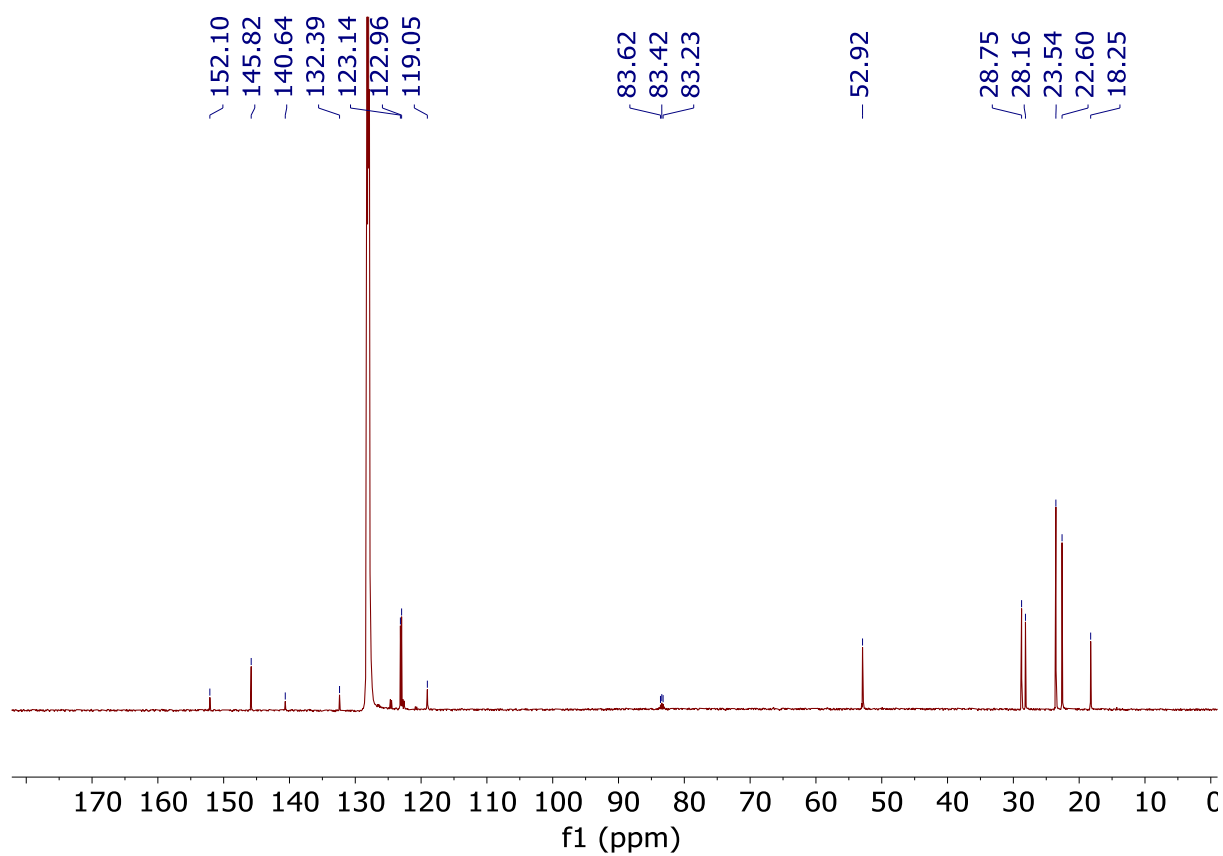

**Figure S16.** <sup>13</sup>C NMR spectrum of W(NAr)(OR<sub>F6</sub>)<sub>2</sub>(C<sub>2</sub>H<sub>4</sub>)(ArNH<sub>2</sub>) (151 MHz, 298K) in C<sub>6</sub>D<sub>6</sub>.

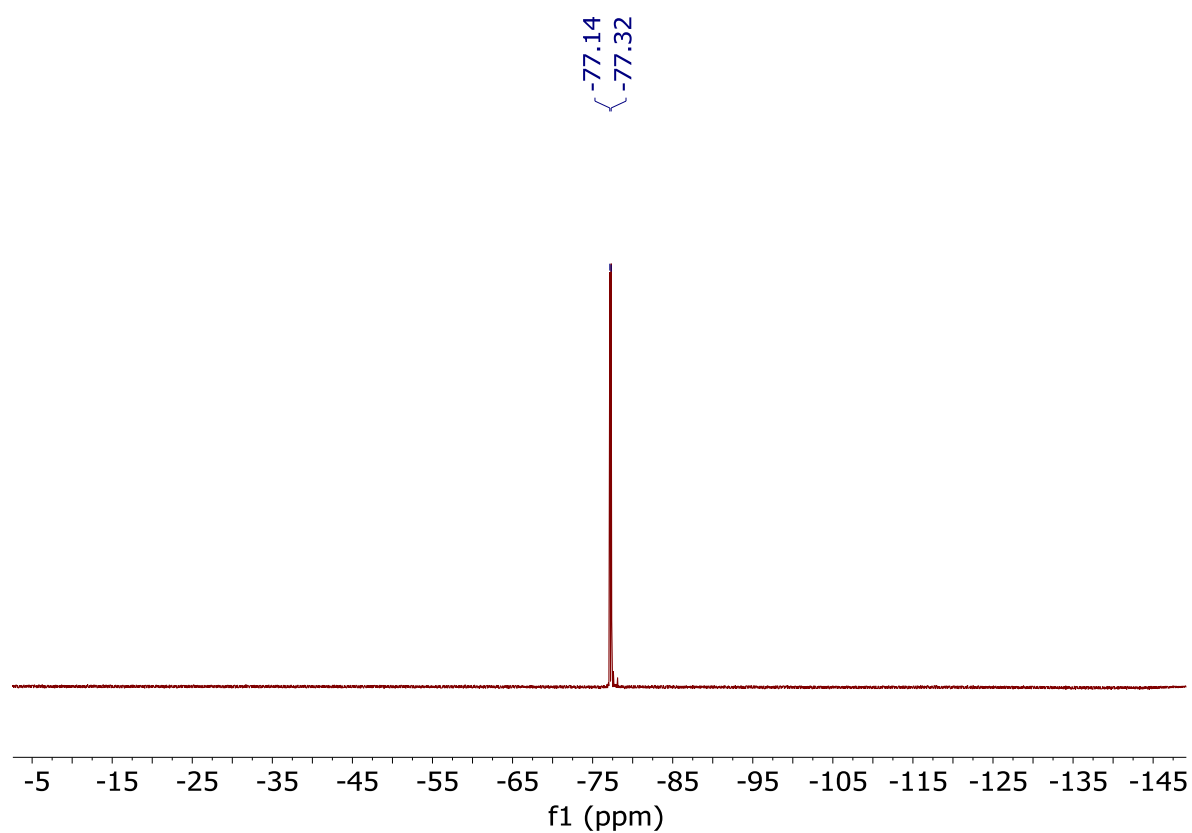

**Figure S17.** <sup>19</sup>F NMR spectrum of W(NAr)(OR<sub>F6</sub>)<sub>2</sub>(C<sub>2</sub>H<sub>4</sub>)(ArNH<sub>2</sub>) (282 MHz, 298K) in C<sub>6</sub>D<sub>6</sub>.

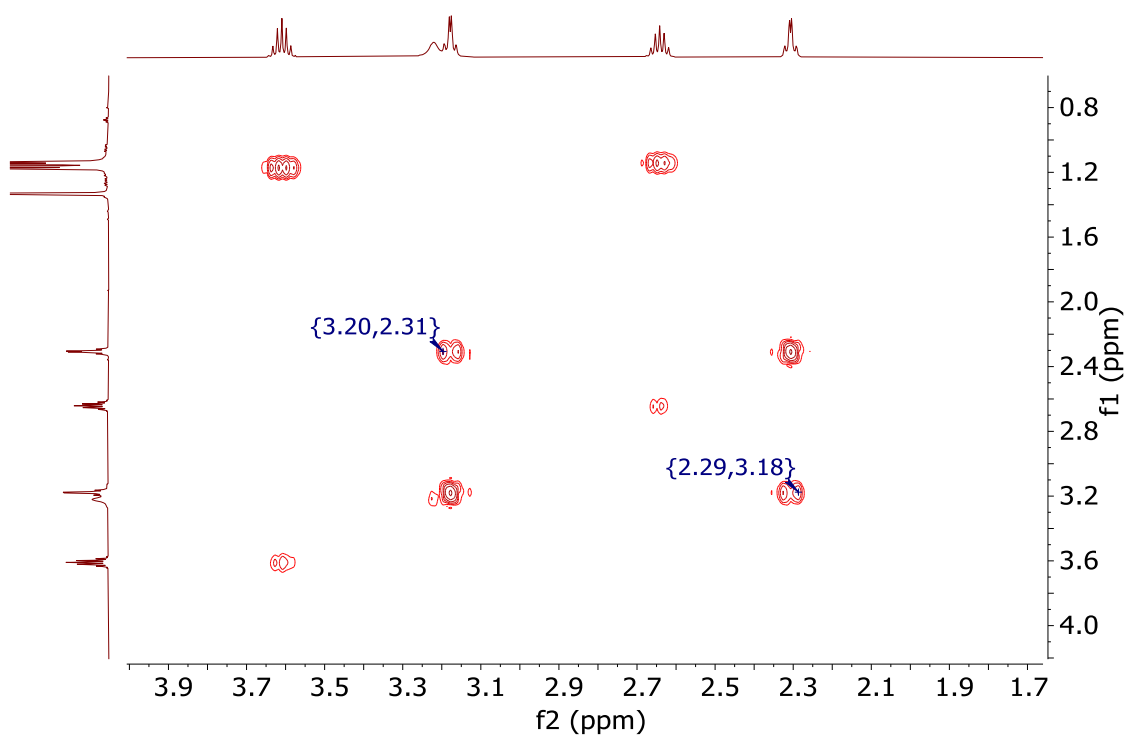

**Figure S18.**  $^1\text{H}$ -COSY spectrum  $\text{W}(\text{NAr})(\text{OR}_{\text{F}_6})_2(\text{C}_2\text{H}_4)(\text{ArNH}_2)$  (600 MHz, 298K) in  $\text{C}_6\text{D}_6$ .

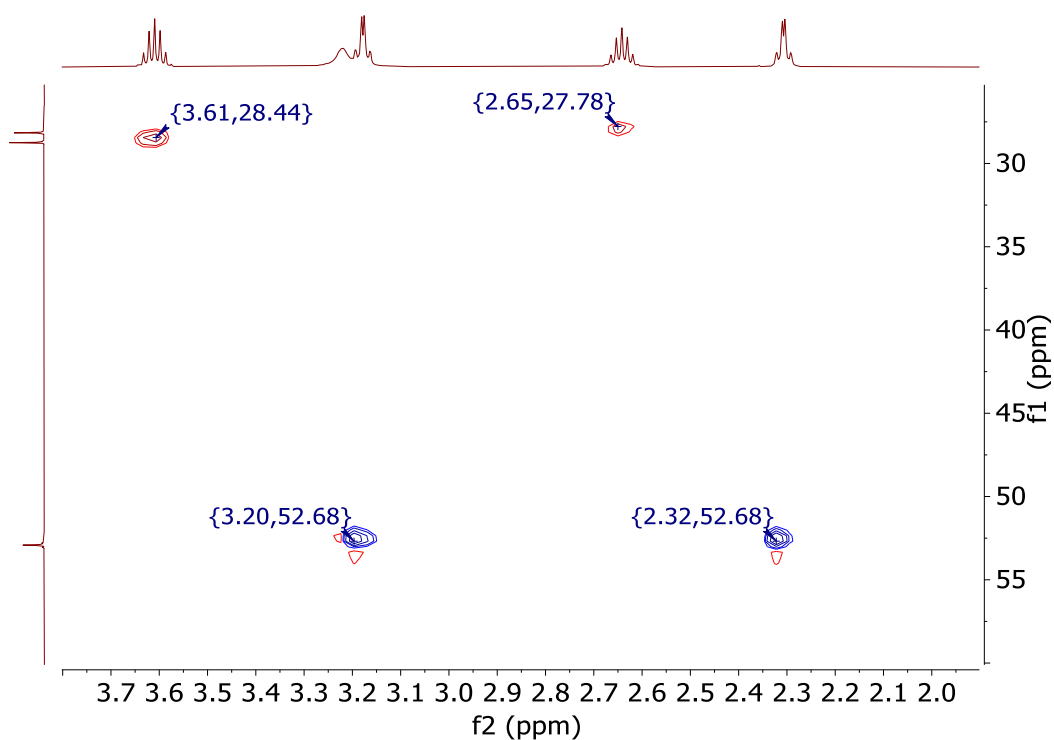

**Figure S19.** The aliphatic area of an HSQC  $\{^1\text{H}, ^{13}\text{C}\}$  spectrum of  $\text{W}(\text{NAr})(\text{OR}_{\text{F}_6})_2(\text{C}_2\text{H}_4)(\text{ArNH}_2)$  (600 MHz, 298K) in  $\text{C}_6\text{D}_6$ .

**W(NAr)(OR<sub>F3</sub>)<sub>2</sub>(C<sub>2</sub>H<sub>4</sub>)(ArNH<sub>2</sub>).** <sup>1</sup>H NMR (300 MHz, C<sub>6</sub>D<sub>6</sub>, 298K): δ 7.17 – 7.11 (m, 5H), 7.0 (t, *J* = 7.6 Hz, 1H), 3.85 (sept, *J* = 6.9 Hz, 2H), 3.30 (brs, 2H), 3.13 – 3.07 (m, 2H), 2.76 (sept, *J* = 6.7 Hz, 2H), 2.21 – 2.14 (m, 2H), 1.39 (s, 12H), 1.32 (d, *J* = 6.9 Hz, 12H), 1.25 (d, *J* = 6.8 Hz, 12H). <sup>13</sup>C NMR (75 MHz, C<sub>6</sub>D<sub>6</sub>, 298K): δ 152.38, 146.62, 144.93, 142.71, 140.69, 132.39, 126.56, 123.14, 122.87, 122.50, 119.01, 82.22, 81.83, 81.44, 69.08, 48.71, 35.36, 28.62, 28.19, 24.51, 24.45, 23.62, 22.61. <sup>19</sup>F NMR (282 MHz, C<sub>6</sub>D<sub>6</sub>, 298K): δ –81.9.

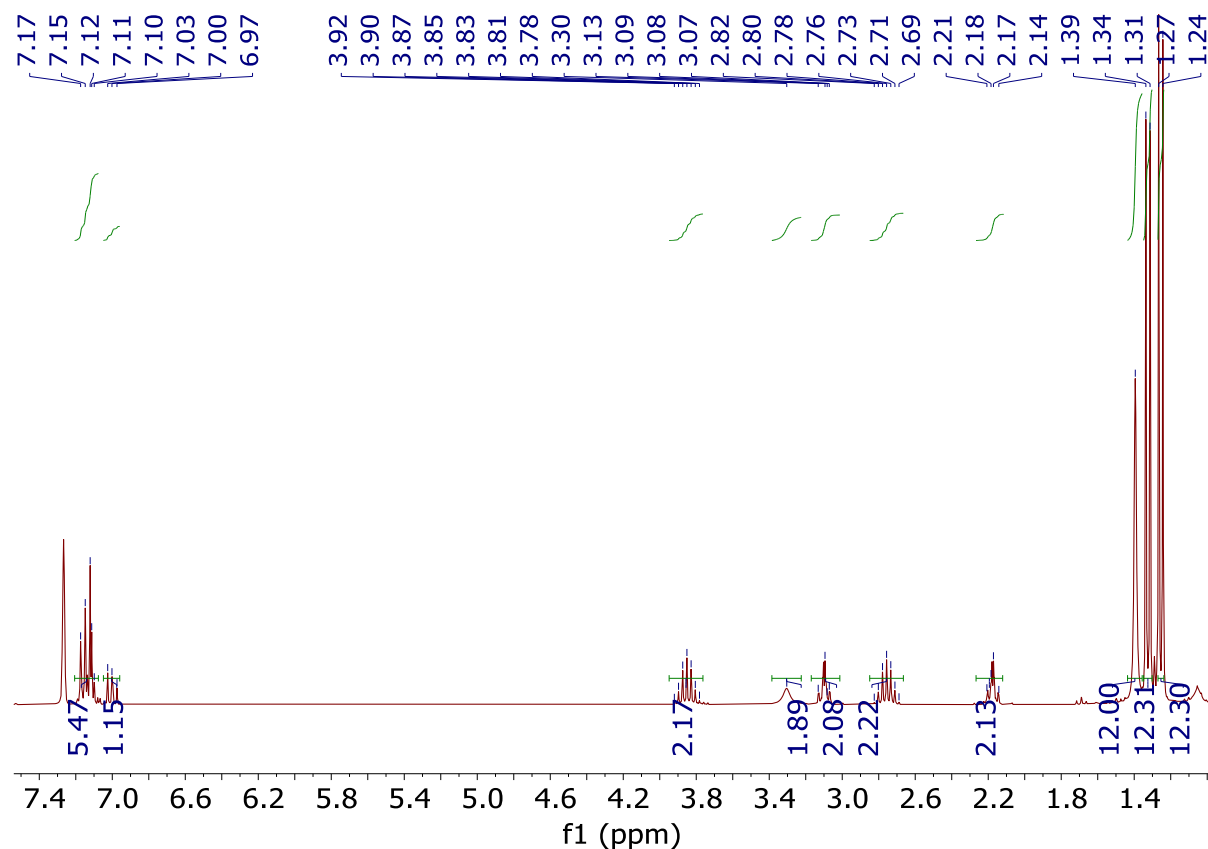

**Figure S20.** <sup>1</sup>H NMR spectrum of W(NAr)(OR<sub>F3</sub>)<sub>2</sub>(C<sub>2</sub>H<sub>4</sub>)(ArNH<sub>2</sub>) (300 MHz, 298K) in C<sub>6</sub>D<sub>6</sub>.

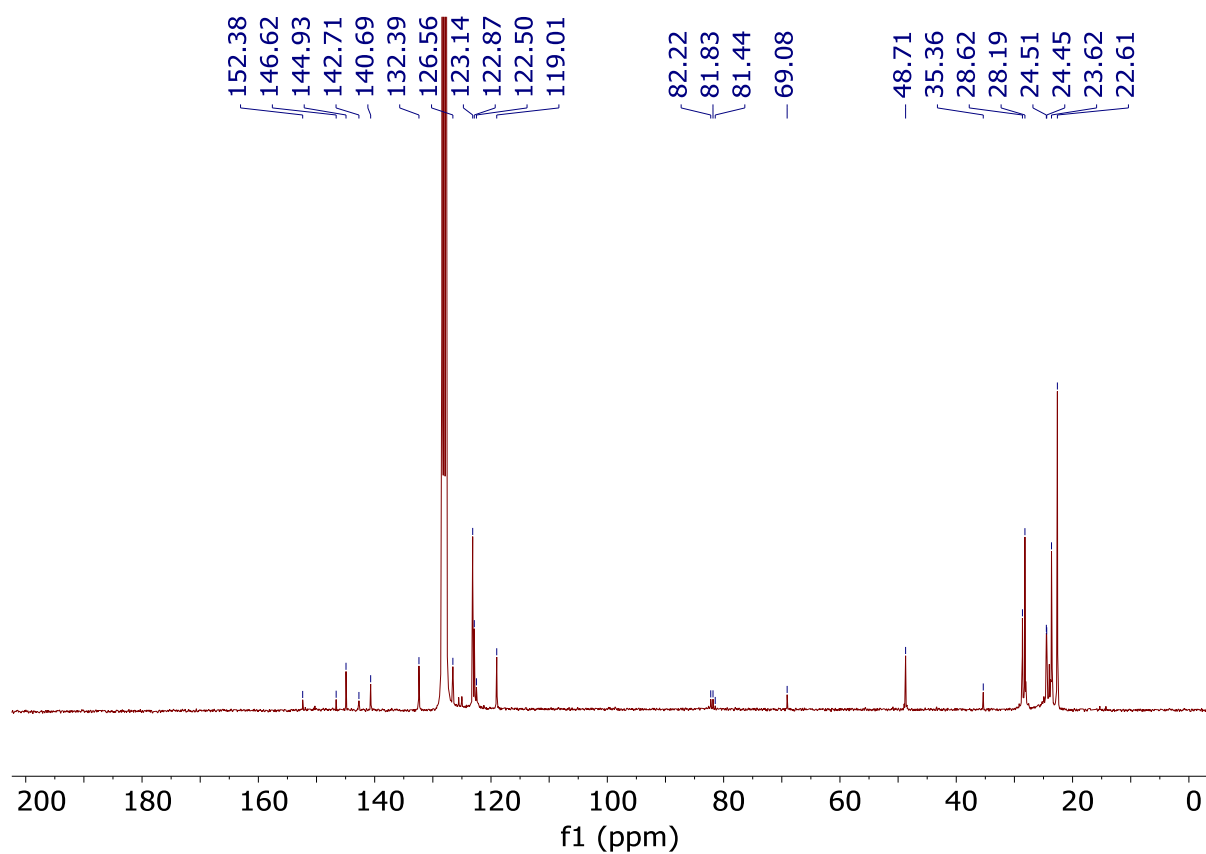

**Figure S21.** <sup>13</sup>C NMR spectrum of W(NAr)(OR<sub>F3</sub>)<sub>2</sub>(C<sub>2</sub>H<sub>4</sub>)(ArNH<sub>2</sub>) (75 MHz, 298K) in C<sub>6</sub>D<sub>6</sub>.

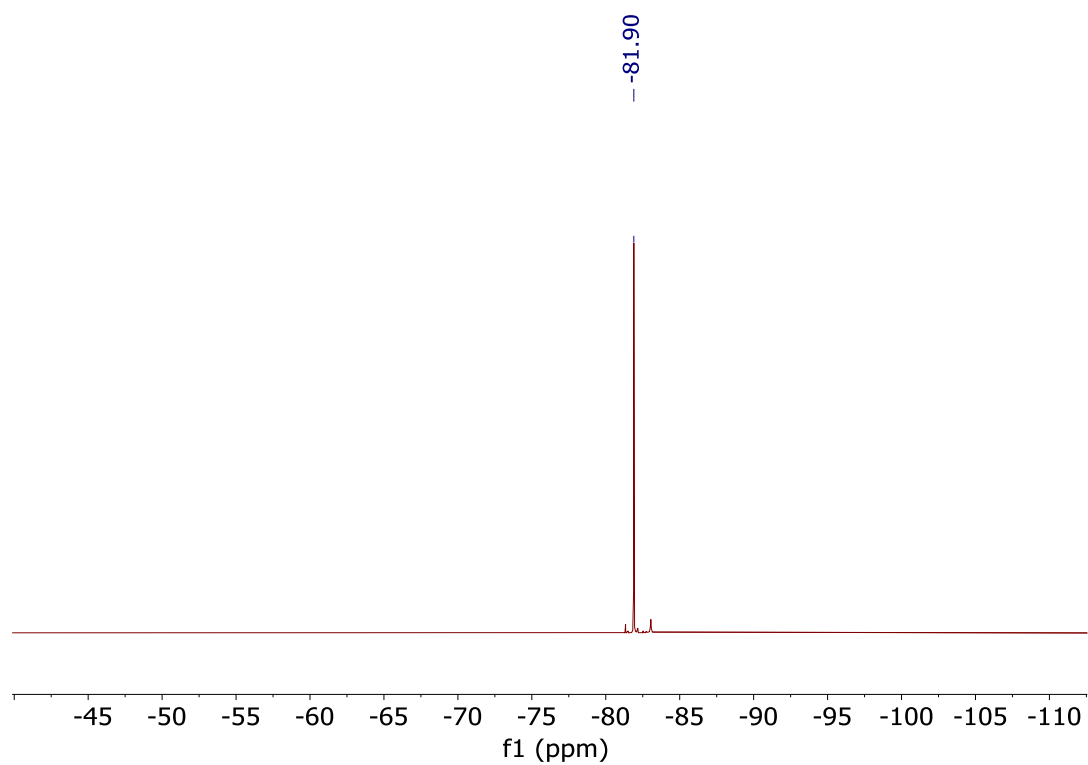

**Figure S22.** <sup>19</sup>F NMR spectrum of W(NAr)(OR<sub>F3</sub>)<sub>2</sub>(C<sub>2</sub>H<sub>4</sub>)(ArNH<sub>2</sub>) (282 MHz, 298K) in C<sub>6</sub>D<sub>6</sub>.



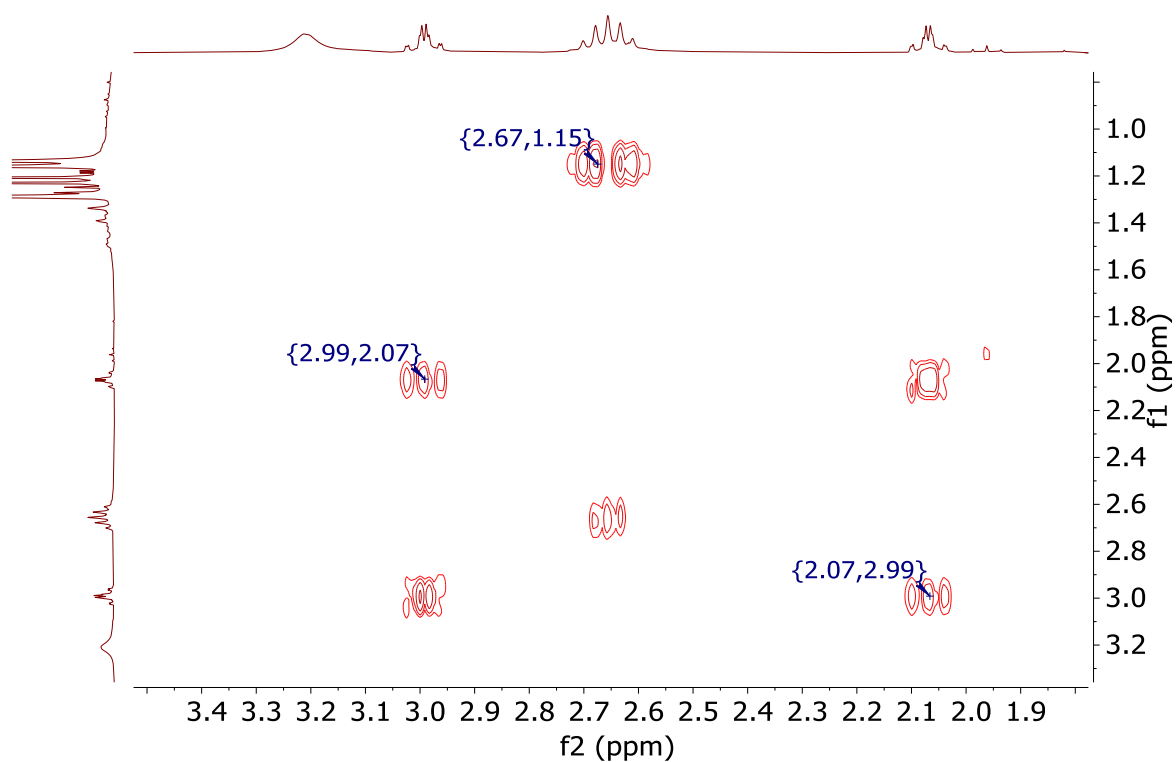

**Figure S23.**  $^1\text{H}$ -COSY spectrum  $\text{W}(\text{NAr})(\text{OR}_{\text{F}_3})_2(\text{C}_2\text{H}_4)(\text{ArNH}_2)$  (300 MHz, 298K) in  $\text{C}_6\text{D}_6$ .

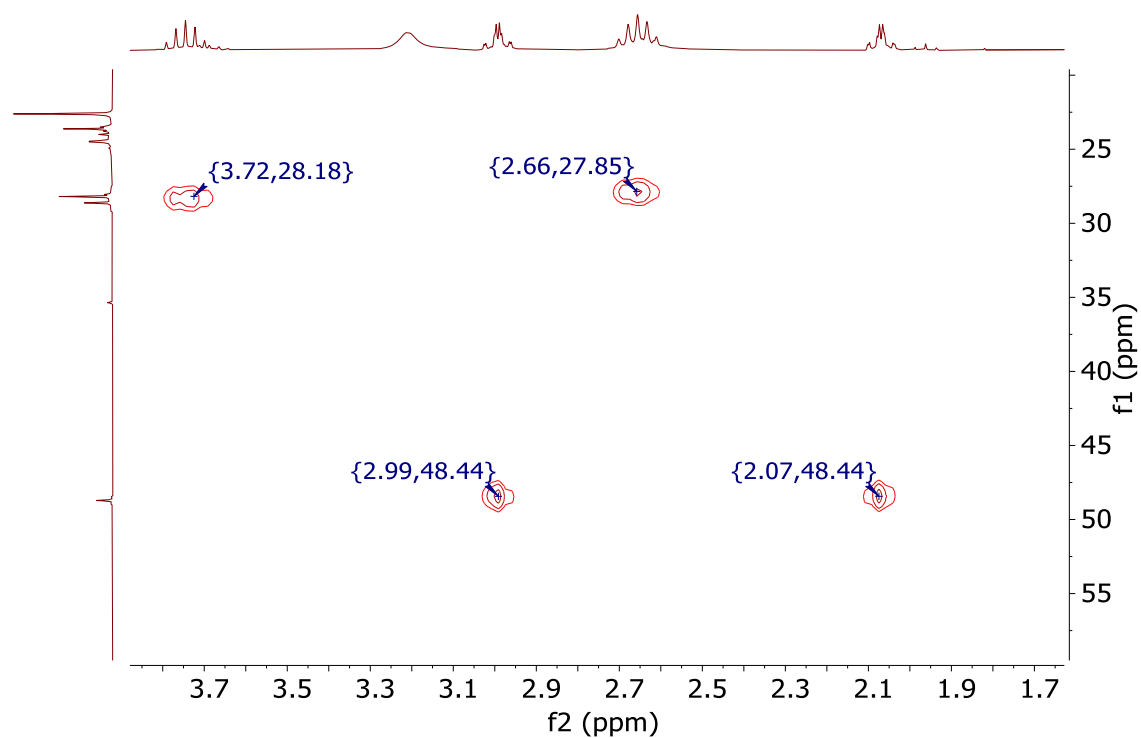

**Figure S24.** The Aliphatic area of HSQC  $\{^1\text{H}; ^{13}\text{C}\}$  spectrum of  $\text{W}(\text{NAr})(\text{OR}_{\text{F}_3})_2(\text{C}_2\text{H}_4)(\text{ArNH}_2)$  (300 MHz, 298K) in  $\text{C}_6\text{D}_6$ .

**W(NAr)(py)[(μ-NAr')(μ-HNAr'')]W(NAr)(OR<sub>F9</sub>)**

<sup>1</sup>H NMR (600 MHz, C<sub>6</sub>D<sub>6</sub>) δ 9.03 (d, *J* = 5.6 Hz, 2H), 7.32 (d, *J* = 7.7 Hz, 2H), 7.23 (d, *J* = 7.6 Hz, 1H), 7.12 (t, *J* = 7.7 Hz, 2H), 7.09 – 7.06 (m, 3H), 7.02 (t, *J* = 7.7 Hz, 1H), 6.81 (t, *J* = 7.6 Hz, 1H), 6.78 (t, *J* = 7.4 Hz, 1H), 6.58 (d, *J* = 8.0 Hz, 1H), 6.50 (d, *J* = 7.3 Hz, 1H), 6.46 (t, *J* = 6.8 Hz, 2H), 4.37 (sept, *J* = 6.8 Hz, 1H), 4.09 (s, 1H), 3.69 (sept, *J* = 6.7 Hz, 2H), 3.63 (s, 3H), 3.45 (sept, *J* = 6.8 Hz, 2H), 3.17 (d, *J* = 5.3 Hz, 1H), 3.08 (sept, *J* = 6.8 Hz, 1H), 2.62 (s, 3H), 2.31 (d, *J* = 5.3 Hz, 1H), 1.55 (d, *J* = 6.8 Hz, 3H), 1.51 (d, *J* = 6.8 Hz, 3H), 1.46 (d, *J* = 6.6 Hz, 3H), 1.41 (d, *J* = 6.6 Hz, 3H), 1.32 (d, *J* = 6.8 Hz, 3H), 1.27 (d, *J* = 6.9 Hz, 3H), 1.14 – 1.09 (m, 18H). <sup>13</sup>C NMR (151 MHz, C<sub>6</sub>D<sub>6</sub>, 298K): δ 301.05, 158.04, 156.57, 152.90, 151.77, 150.45, 149.59, 149.06, 148.45, 148.19, 147.44, 144.73, 140.46, 138.51, 125.11, 124.21, 122.75, 121.90, 120.43, 120.38, 115.38, 77.37, 65.52, 63.73, 31.27, 30.88, 30.44, 28.78, 26.93, 26.48, 26.34, 26.24, 22.42, 21.48, 15.19. <sup>19</sup>F NMR (282 MHz, C<sub>6</sub>D<sub>6</sub>, 298K): δ –73.42.

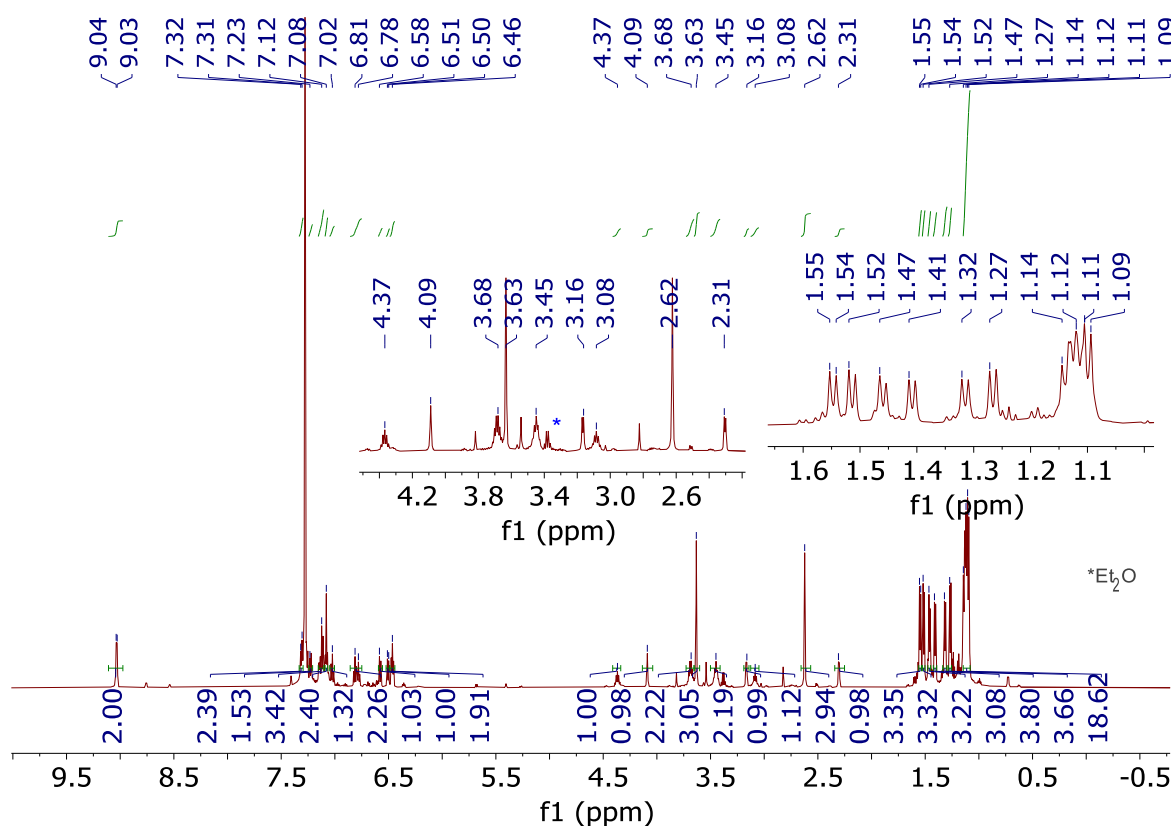

**Figure S25.** <sup>1</sup>H NMR spectrum of W(NAr)(py)[(μ-NAr')(μ-HNAr'')]W(NAr)(OR<sub>F9</sub>) (600 MHz, 298K) in C<sub>6</sub>D<sub>6</sub>.

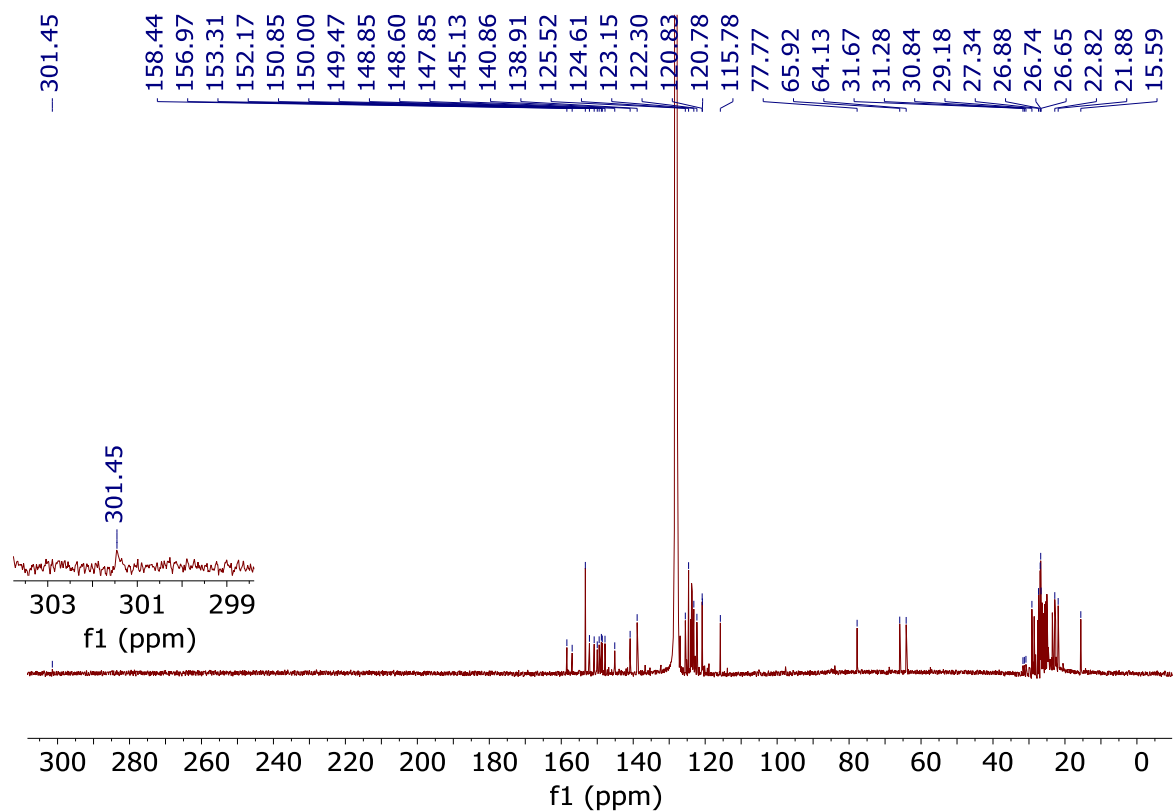

**Figure S26.** <sup>13</sup>C NMR spectrum of W(NAr)(py)[(μ-NAr')(μ-NHAr'')]W(NAr)(OR<sub>F9</sub>) (151 MHz, 298K) in C<sub>6</sub>D<sub>6</sub>.

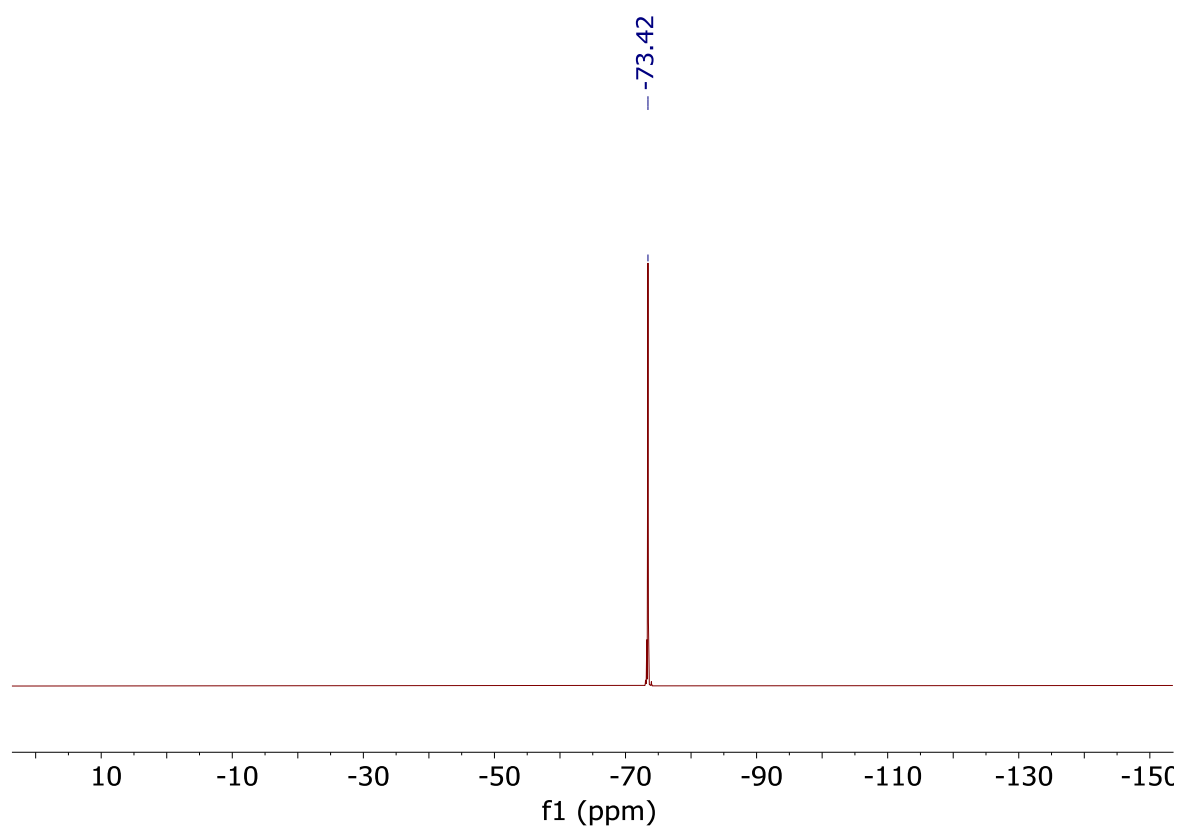

**Figure S27.** <sup>19</sup>F NMR spectrum of W(NAr)(py)[(μ-NAr')(μ-NHAr'')]W(NAr)(OR<sub>F9</sub>) (564 MHz, 298K) in C<sub>6</sub>D<sub>6</sub>.

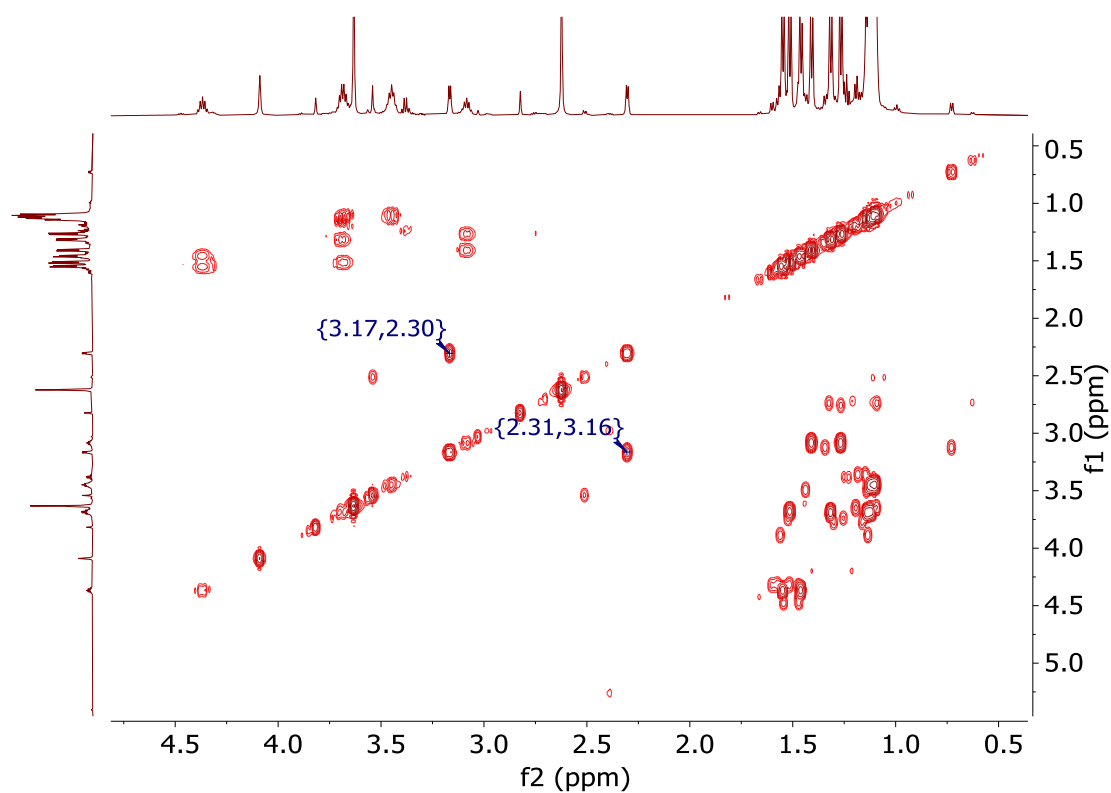

**Figure S28.**  $^1\text{H}$ -COSY spectrum  $\text{W}(\text{NAr})(\text{py})[(\mu\text{-NAr}')(\mu\text{-NHAr}'')]\text{W}(\text{NAr})(\text{OR}_{\text{F9}})$  (600 MHz, 298K) in  $\text{C}_6\text{D}_6$ .

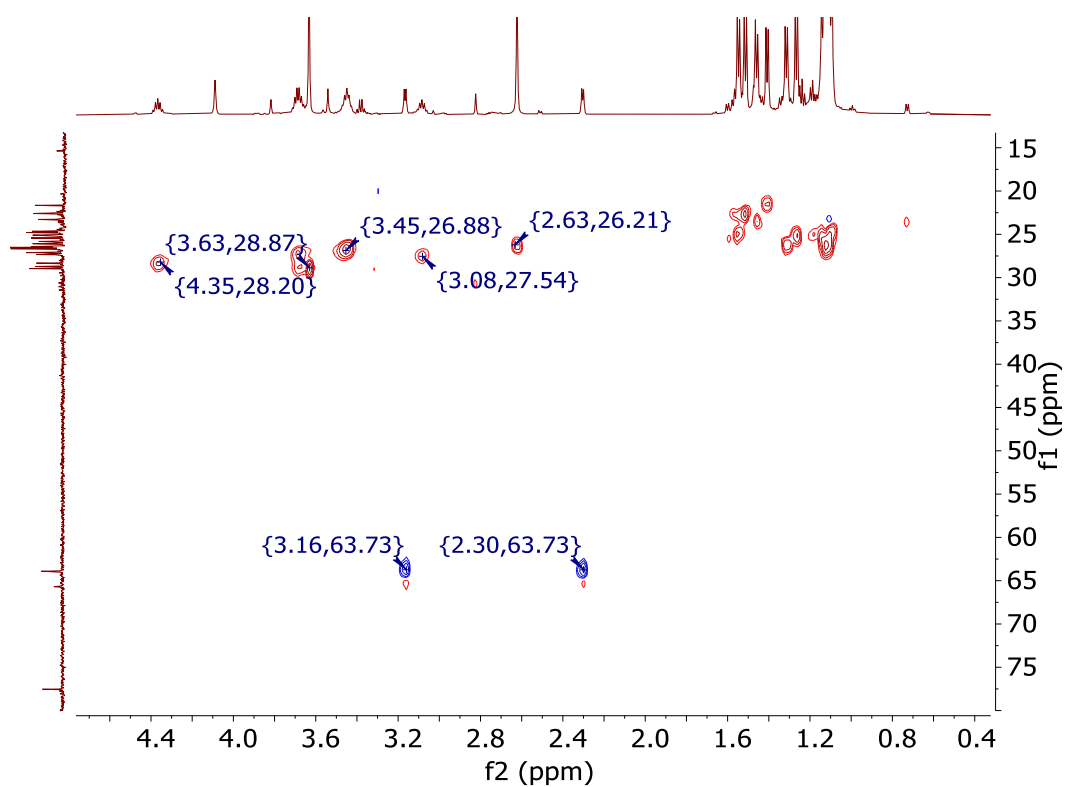

**Figure S29.** The Aliphatic area of  $\text{HSQC}\{^1\text{H};^{13}\text{C}\}$  spectrum of  $\text{W}(\text{NAr})(\text{py})[(\mu\text{-NAr}')(\mu\text{-NHAr}'')]\text{W}(\text{NAr})(\text{OR}_{\text{F9}})$  (600 MHz, 298K) in  $\text{C}_6\text{D}_6$ .

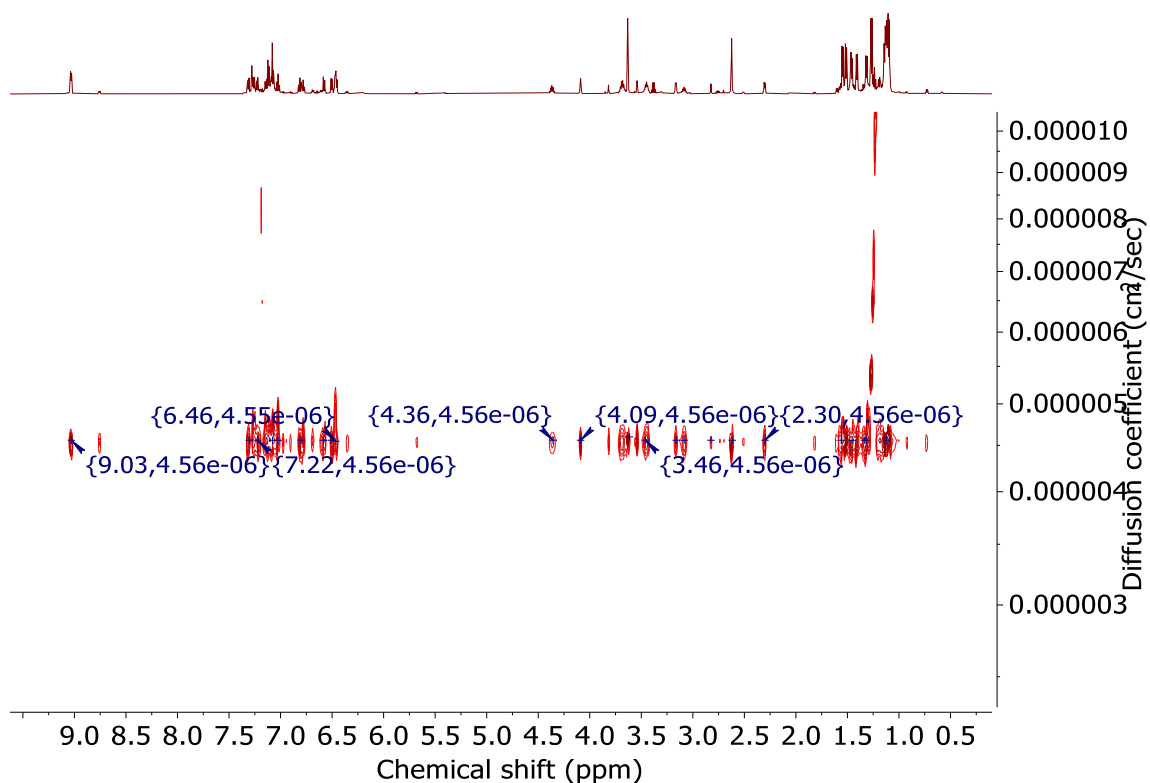

**Figure S30.** The DOSY spectrum of  $W(NAr)(py)[(\mu-NAr')(\mu-NHAr'')]W(NAr)(OR_{F9})$  (600 MHz, 298K) in  $C_6D_6$ .

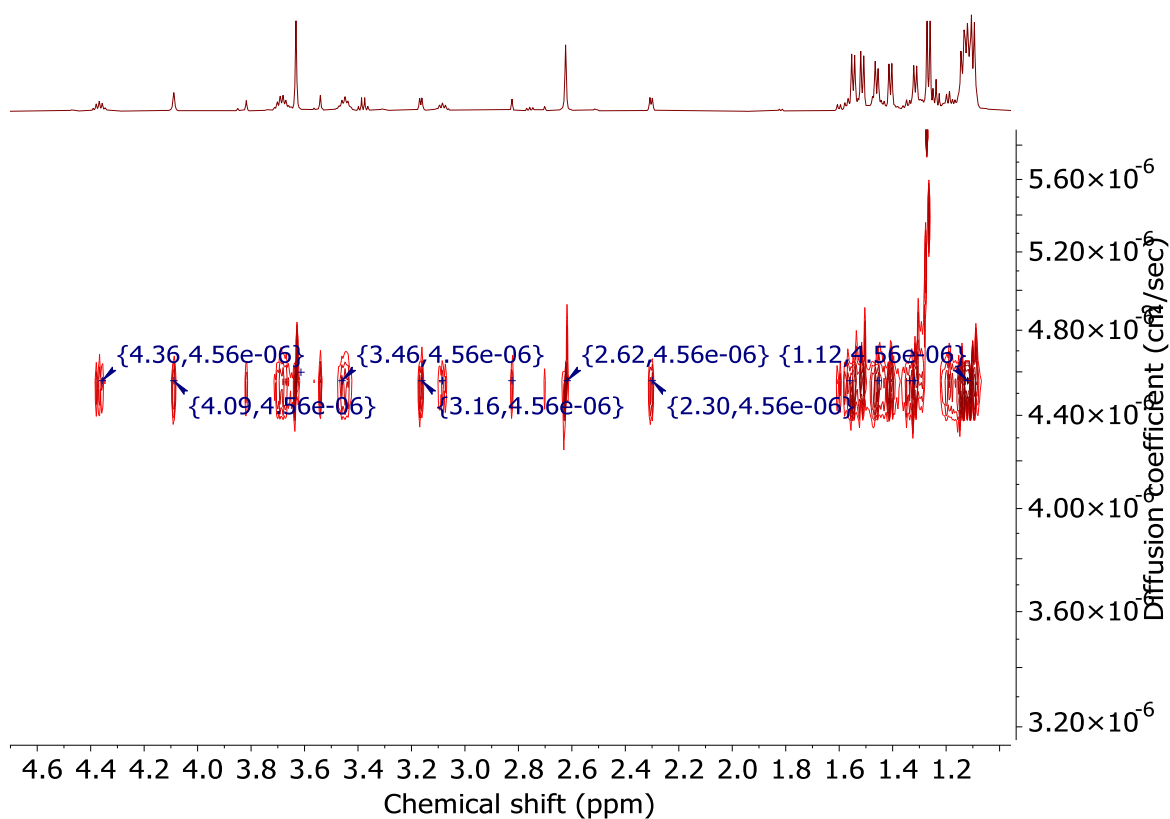

**Figure S31.** The aliphatic area of a DOSY spectrum of  $W(NAr)(py)[(\mu-NAr')(\mu-NHAr'')]W(NAr)(OR_{F9})$  (600 MHz, 298K) in  $C_6D_6$ .

### 3. Mechanistic Experiments

#### Solution stability of $W(NAr)(ArNH_2)(OR_{F9})_2(C_2H_4)$

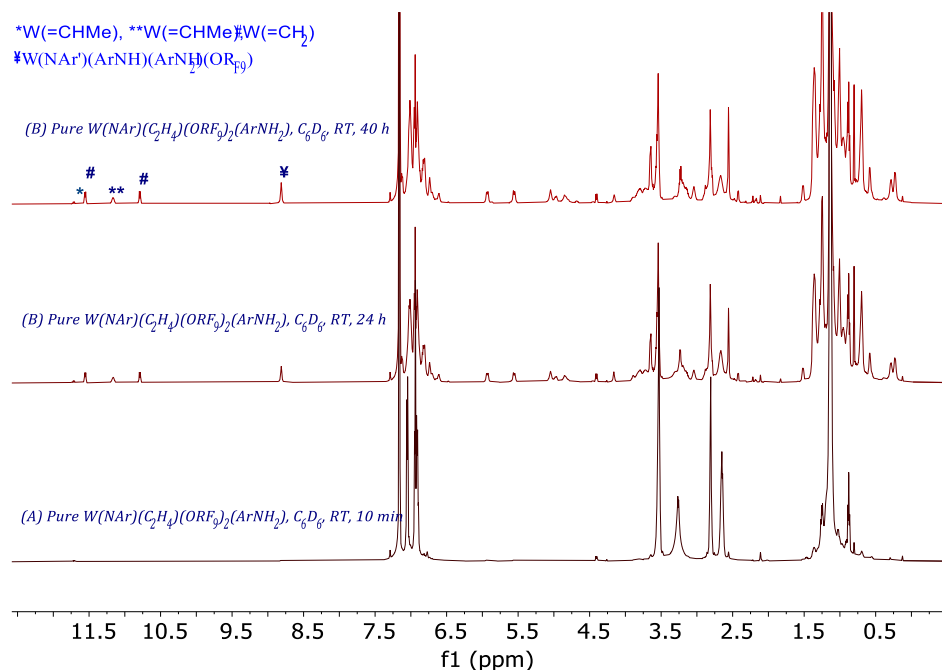

**Figure S32.**  $^1H$  NMR spectra of  $W(NAr)(ArNH_2)(OR_{F9})_2(C_2H_4)$  in  $C_6D_6$  after A) 10 min and B) 24 h, and C) 40 h (600 MHz, 298K).

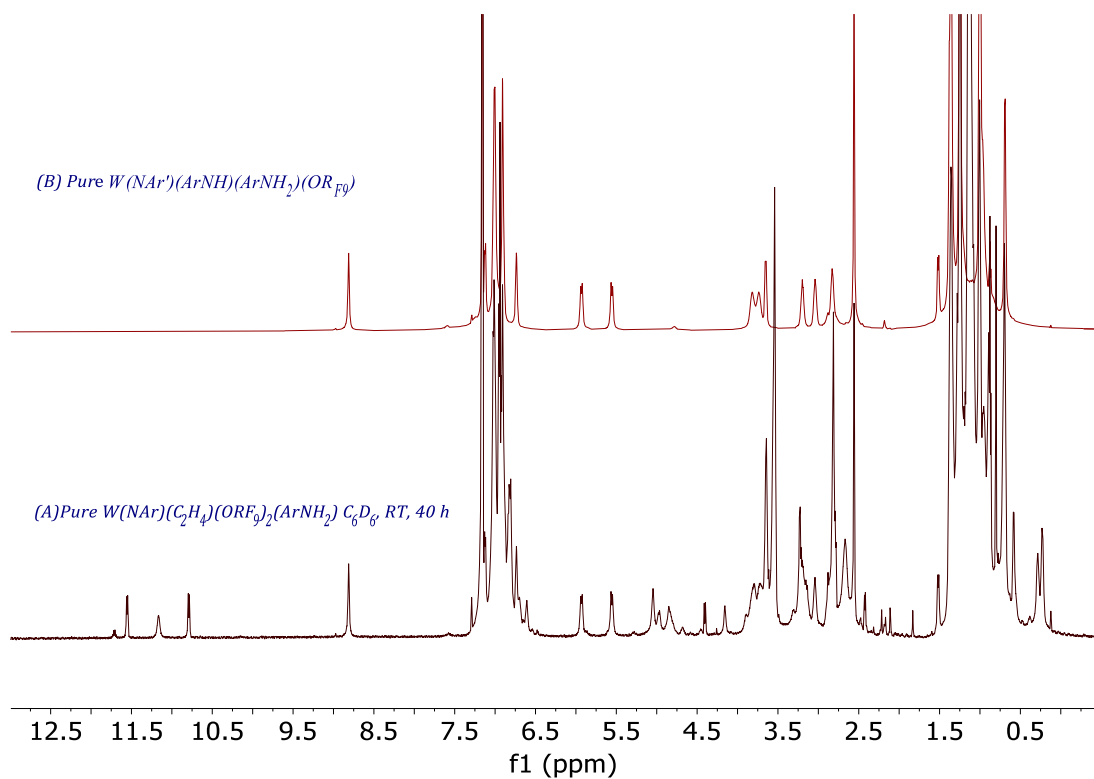

**Figure S33.**  $^1H$  NMR spectra of A)  $W(NAr)(ArNH_2)(OR_{F9})_2(C_2H_4)$  in  $C_6D_6$  40 h and B) pure sample of  $W(NAr')(ArNH)(ArNH_2)(OR_{F9})$  (600 MHz, 298K).

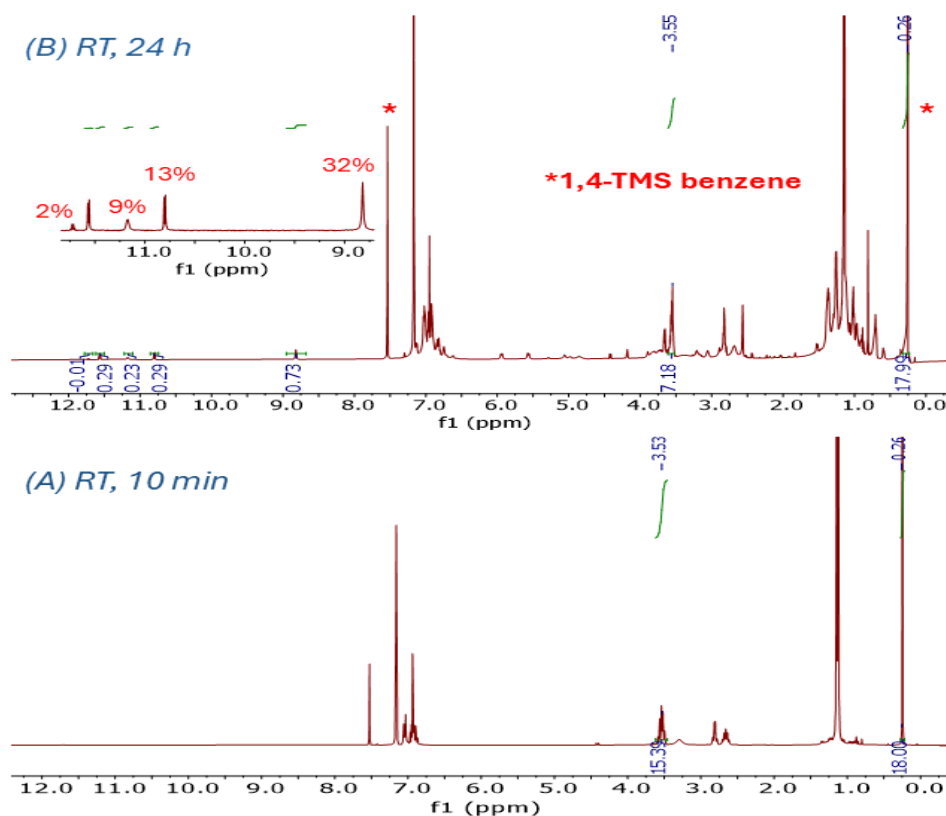

**Figure S34.** Quantification of the decomposition products in the above reaction mixture using 1,4-TMS benzene as internal standard (600 MHz, 298K).

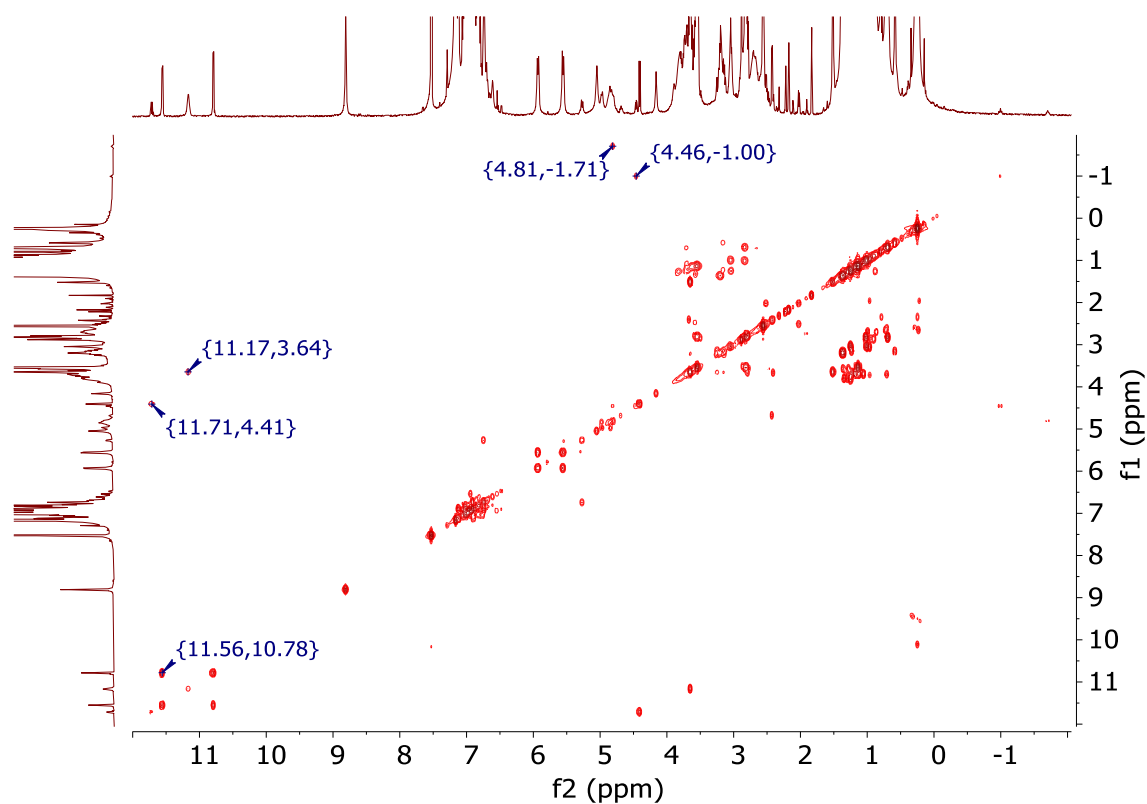

**Figure S35.** The  $^1\text{H}$ -COSY spectrum of the above reaction mixture (600 MHz, 298K) in  $\text{C}_6\text{D}_6$ .

**Reaction of  $W(NAr)(ArNH_2)(OR_{F9})_2(C_2H_4)$  with  $B(C_6F_5)_3$**

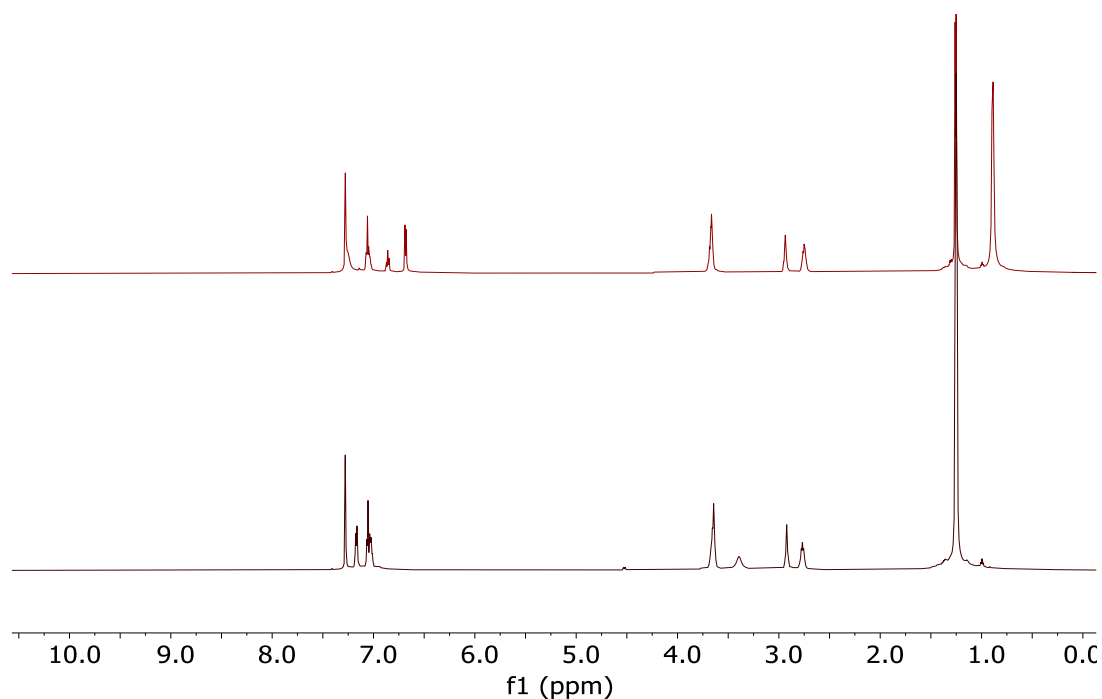

**Figure S36.**  $^1H$  NMR spectra of A)  $W(NAr)(ArNH_2)(OR_{F9})_2(C_2H_4)$  and B) 10 min after addition of  $B(C_6F_5)_3$  in  $C_6D_6$  (600 MHz, 298K).

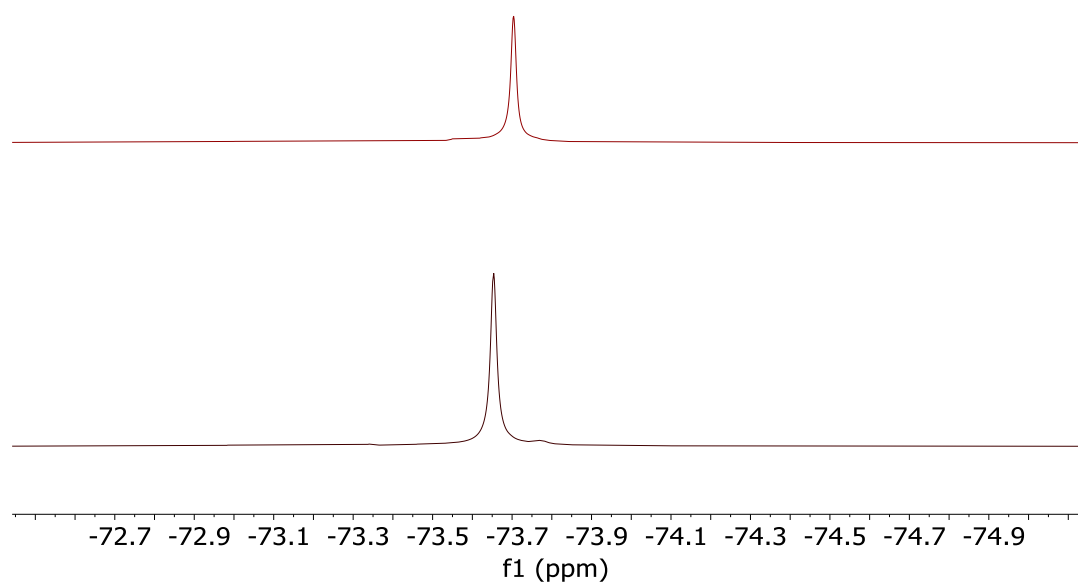

**Figure S37.**  $^{19}F$  NMR spectra of A)  $W(NAr)(ArNH_2)(OR_{F9})_2(C_2H_4)$  and B) 10 min after addition of  $B(C_6F_5)_3$  in  $C_6D_6$  (564 MHz, 298K).



**Solution stability of  $W(NAr)(OR_{F9})_2(C_2H_4)$**

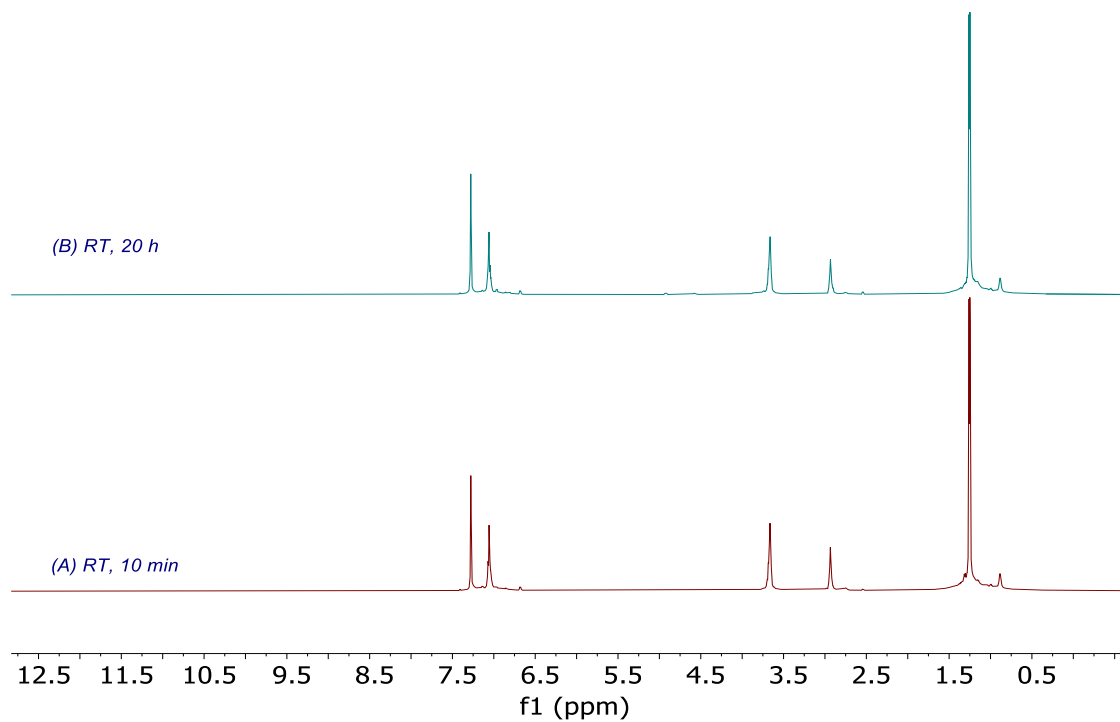

**Figure S38.**  $^1H$  NMR spectra of  $W(NAr)(OR_{F9})_2(C_2H_4)$  in  $C_6D_6$  after A) 10 min and B) 20 h (600 MHz, 298K) in  $C_6D_6$ .

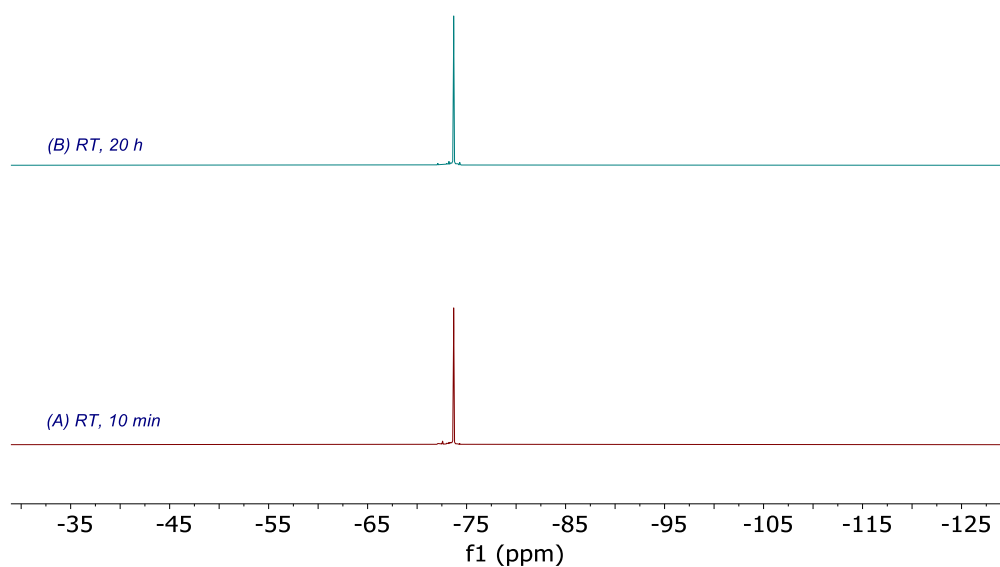

**Figure S39.**  $^{19}F$  NMR spectra of  $W(NAr)(OR_{F9})_2(C_2H_4)$  in  $C_6D_6$  after A) 10 min and B) 20 h (564 MHz, 298K) in  $C_6D_6$ .

**Reaction of  $W(NAr)(ArNH_2)(OR_{F9})_2(C_2H_4)$  with ethylene**

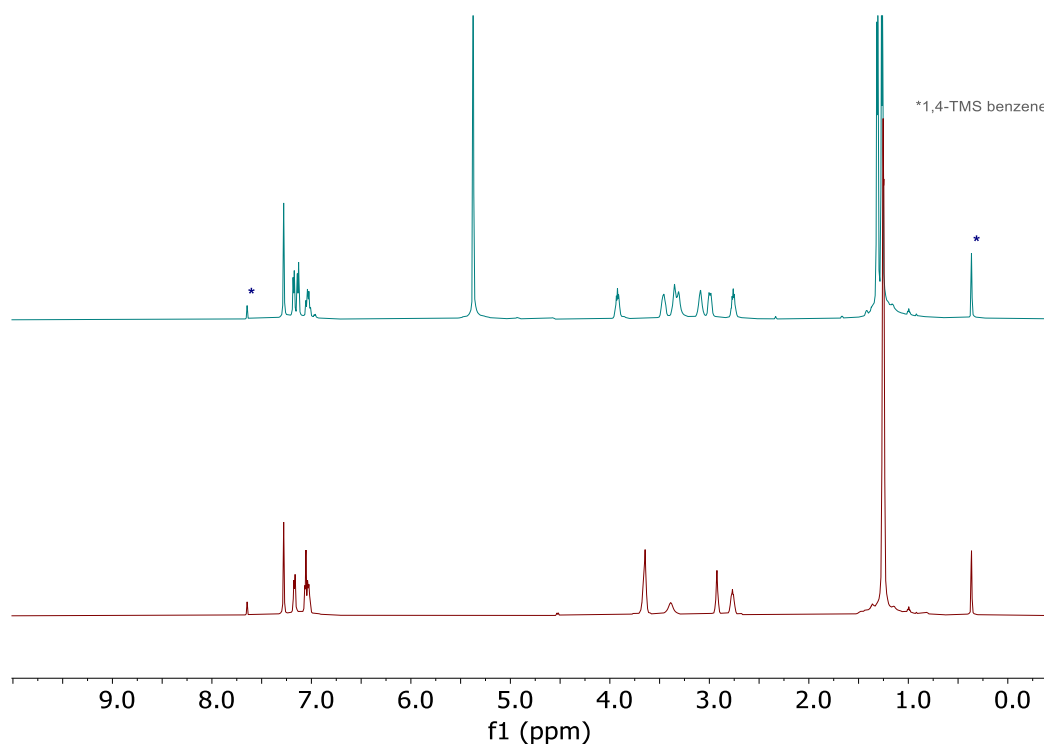

**Figure S40.**  $^1H$  NMR spectra of A)  $W(NAr)(ArNH_2)(OR_{F9})_2(C_2H_4)$ , and B) after 10 min of addition of ethylene (600 MHz, 298K) in  $C_6D_6$ .

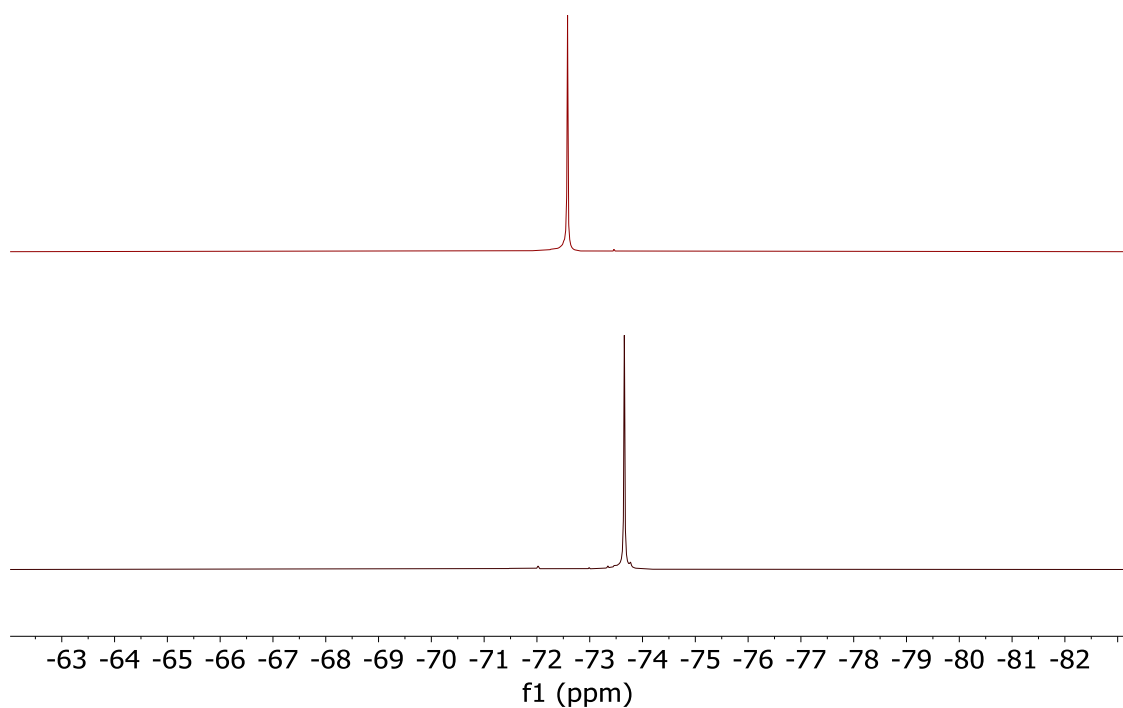

**Figure S41.**  $^{19}F$  NMR spectra of A)  $W(NAr)(ArNH_2)(OR_{F9})_2(C_2H_4)$ , and B) after 10 min of addition of ethylene (564 MHz, 298K) in  $C_6D_6$ .

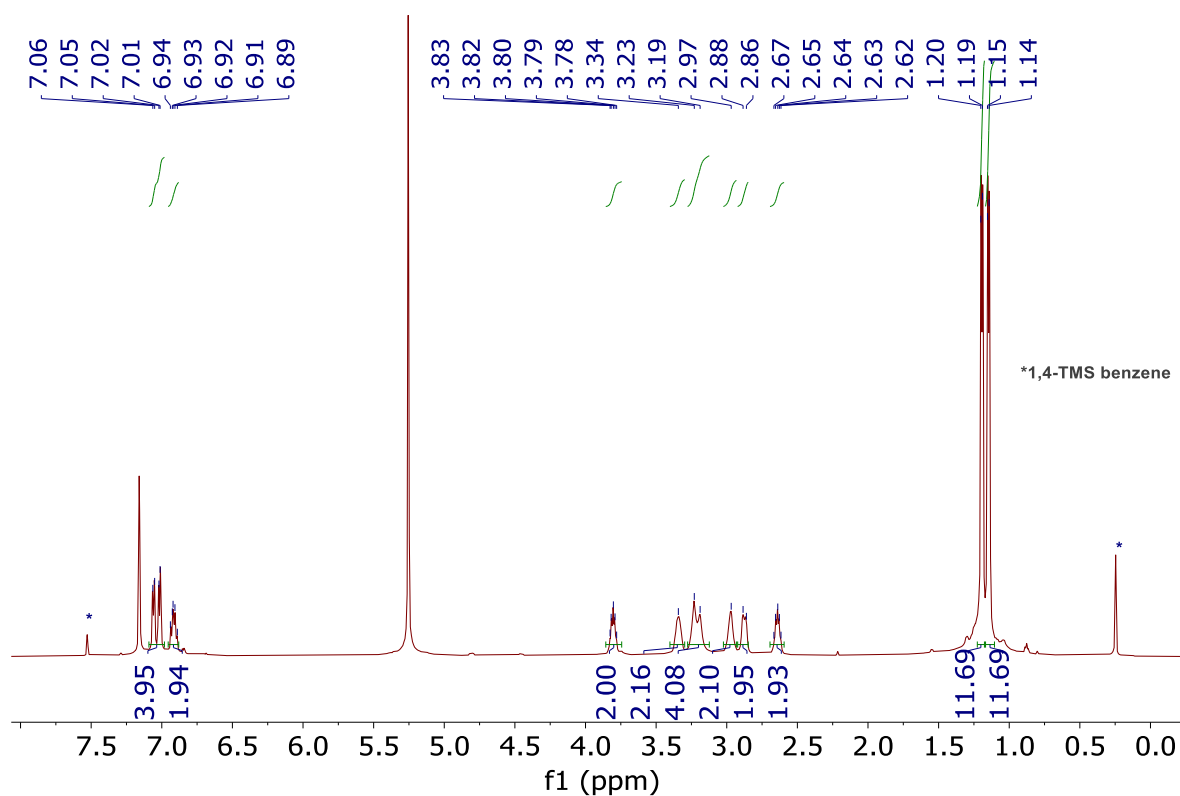

**Figure S42.**  $^1\text{H}$  NMR spectra of  $\text{W}(\text{NAr})(\text{ArNH}_2)(\text{OR}_{\text{F9}})_2(\text{C}_2\text{H}_4)$  after 10 min of addition of ethylene (600 MHz, 298K) in  $\text{C}_6\text{D}_6$ .

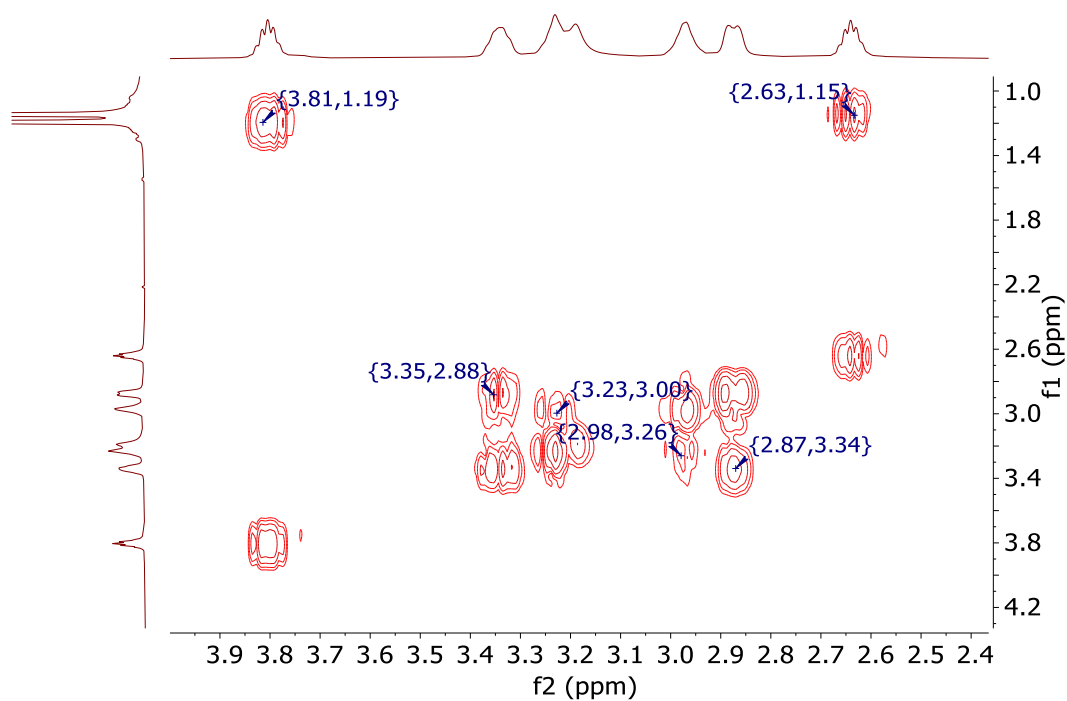

**Figure S43.** The aliphatic area of COSY spectrum of the above reaction mixture (600 MHz, 298K) in  $\text{C}_6\text{D}_6$ .

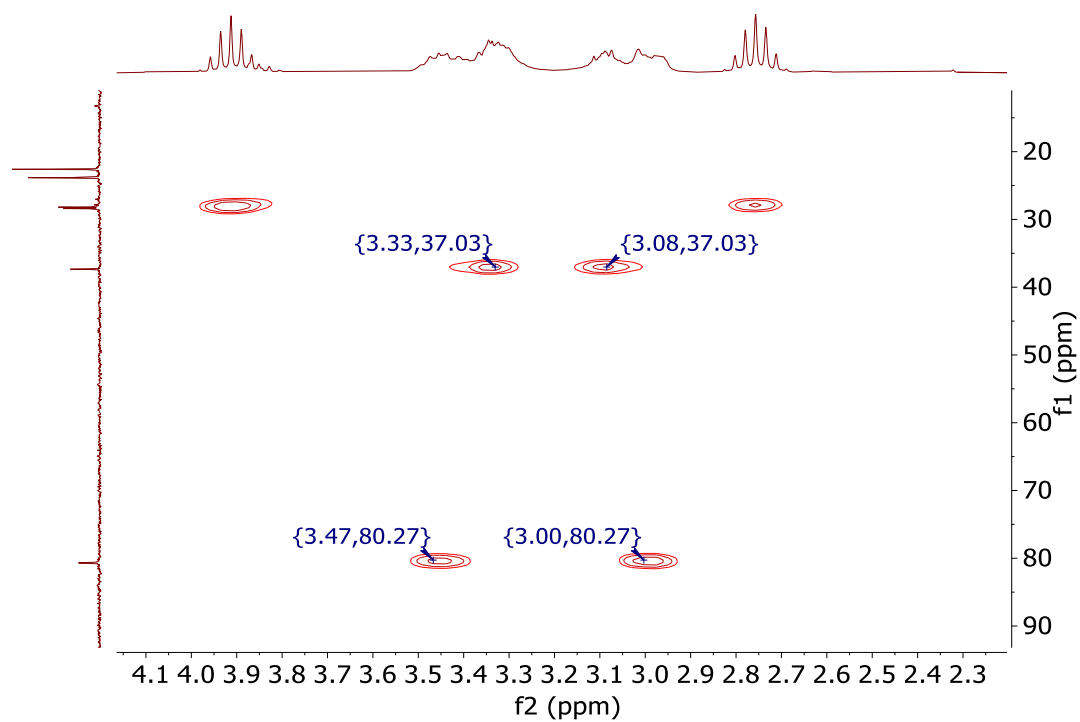

**Figure S44.** The aliphatic area of HSQC  $\{^1\text{H}, ^{13}\text{C}\}$  spectrum of the above reaction mixture (300 MHz, 298K) in  $\text{C}_6\text{D}_6$ .

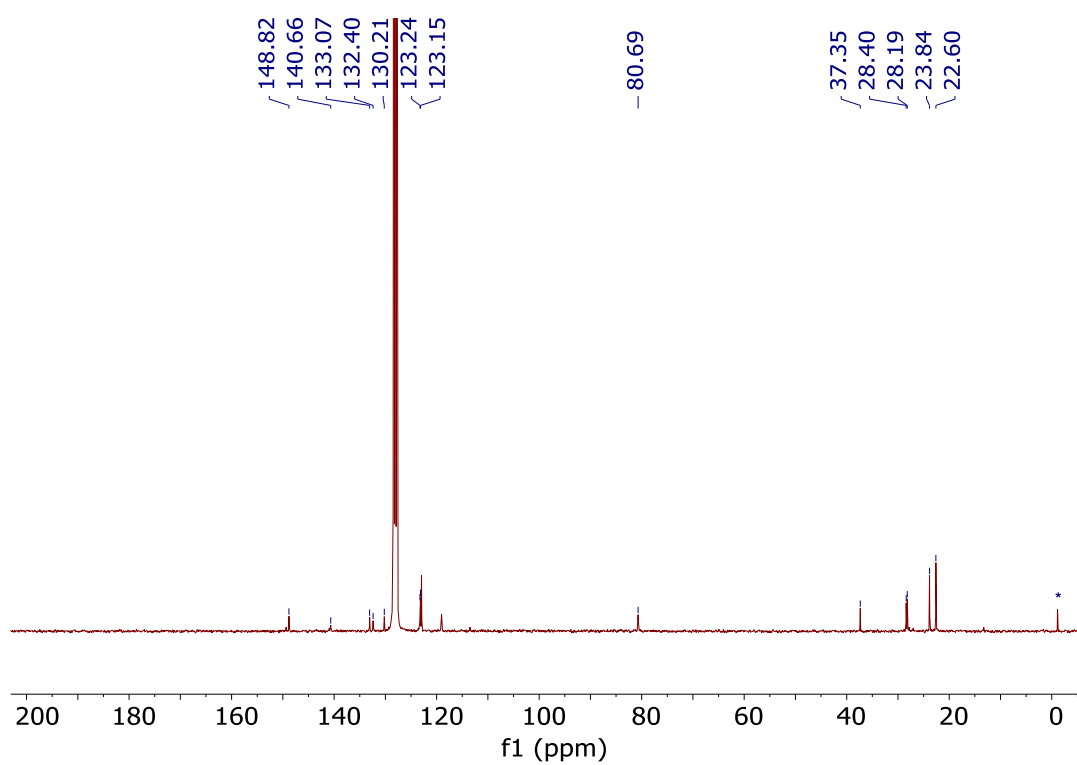

**Figure S45.**  $^{13}\text{C}$  NMR spectrum of the above reaction mixture (75 MHz, 298K) in  $\text{C}_6\text{D}_6$ . \*1,4-TMS benzene ( $J_{\text{W-C}} = 73.8$  Hz).

## Reaction of $W(NAr)(OR_{F9})_2(C_2H_4)$ with ethylene

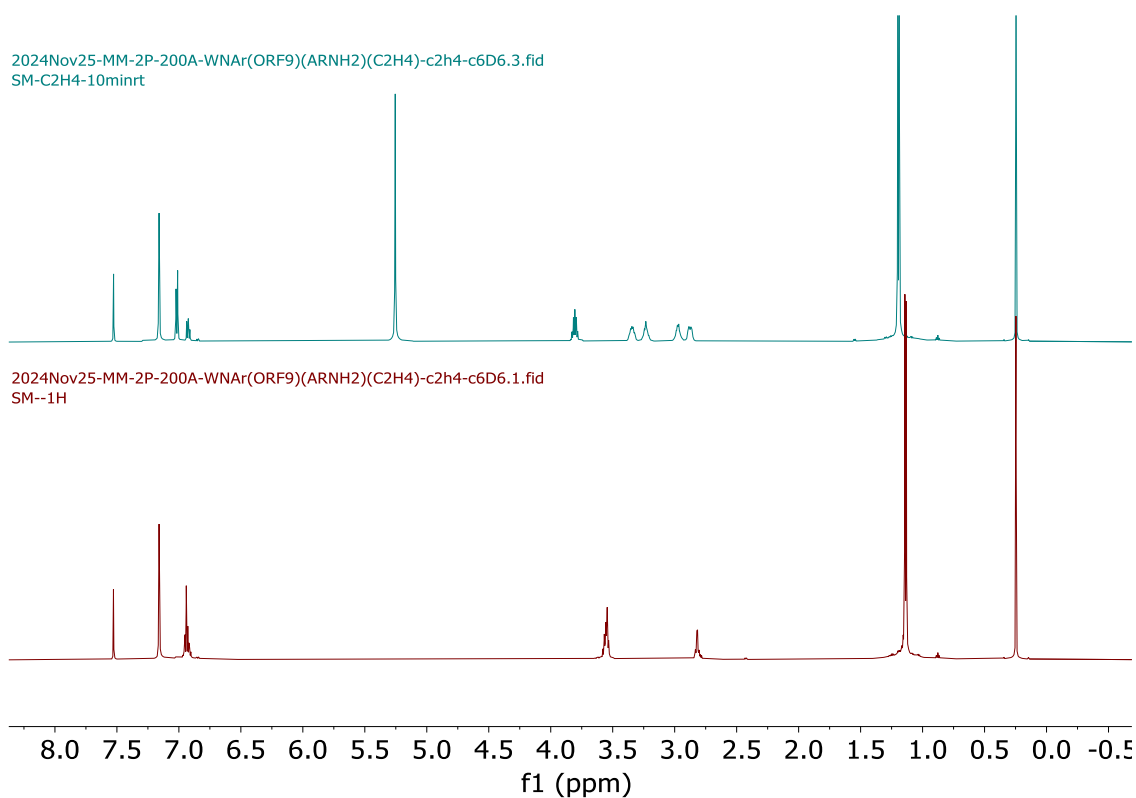

**Figure S46.**  $^1H$  NMR spectra of  $W(NAr)(OR_{F9})_2(C_2H_4)$  after 10 min of addition of ethylene (600 MHz, 298K) in  $C_6D_6$ .

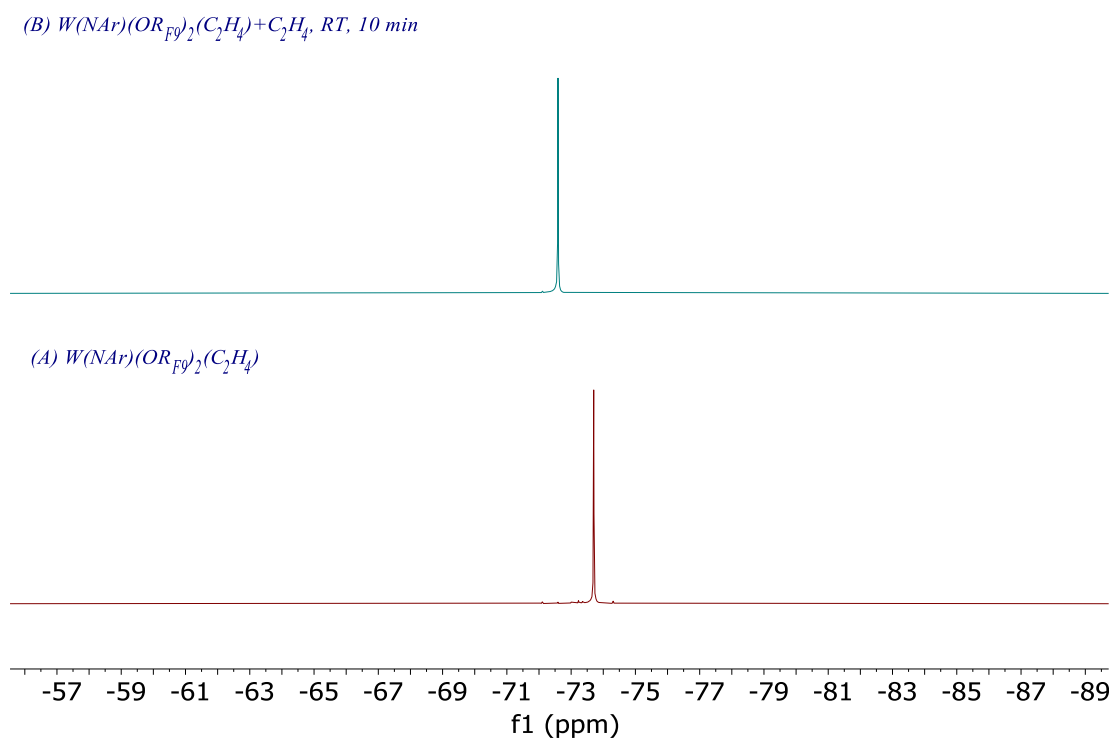

**Figure S47.**  $^{19}F$  NMR spectra of A)  $W(NAr)(OR_{F9})_2(C_2H_4)$ , and B) after 10 min of addition of ethylene (564 MHz, 298K) in  $C_6D_6$ .

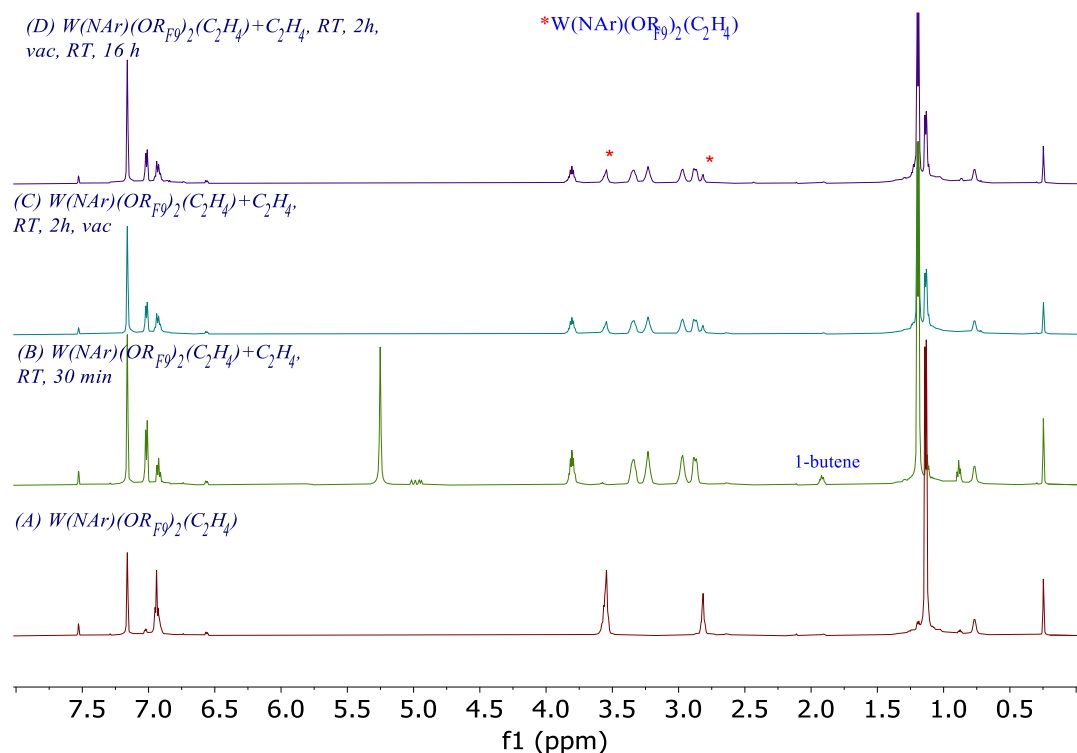

**Figure S48.**  $^1H$  NMR (600 MHz, 298K) spectra showing the decomposition of  $W(NAr)(OR_{F9})_2(C_4H_8)$  in absence of ethylene to a mixture of  $W(NAr)(OR_{F9})_2(C_2H_4)$  and  $W(NAr)(OR_{F9})_2(C_4H_8)$  in  $C_6D_6$ .

**One pot formation of  $W(NAr)(OR_{F9})_2(C_4H_8)$  that avoids formation of  $W(NAr)(Ar'NH)(ArNH_2)(OR_{F9})$**

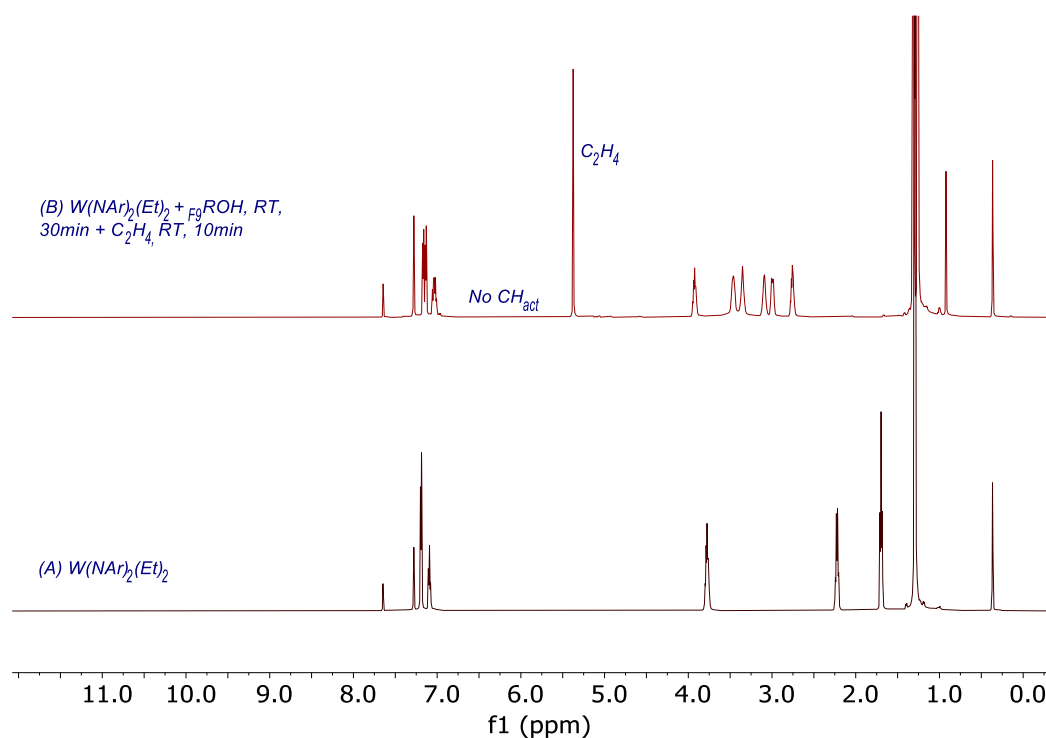

**Figure S49.**  $^1H$  NMR spectra of A)  $W(NAr)_2Et_2$  and B) upon successive addition of  $R_{F9}OH$  and  $C_2H_4$  within 30 min (600 MHz, 298K) in  $C_6D_6$ .

## Formation of 1-butene from ethylene by $W(NAr)(ArNH_2)(OR_{F9})_2(C_2H_4)$

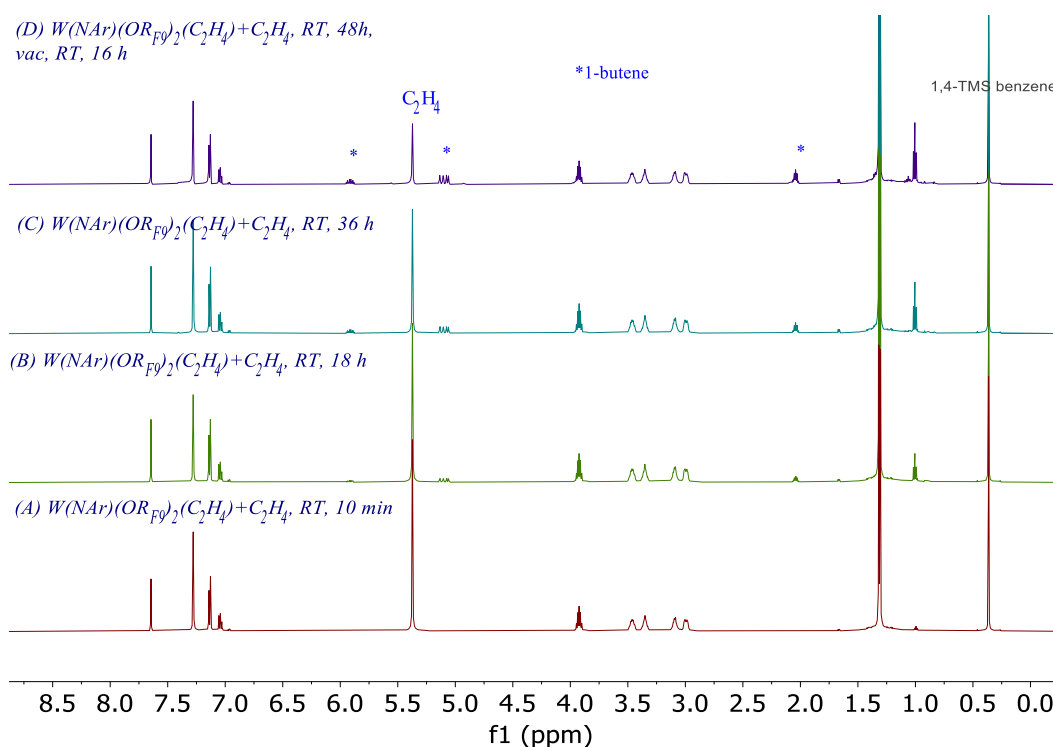

**Figure S50.**  $^1H$  NMR spectra showing the slow formation of 1-butene from ethylene by  $W(NAr)(OR_{F9})_2(C_4H_8)$  in absence of coordinated aniline (600 MHz, 298K) in  $C_6D_6$ .

## Photolysis study of $W(NAr)(OR_{F9})_2(C_4H_8)$

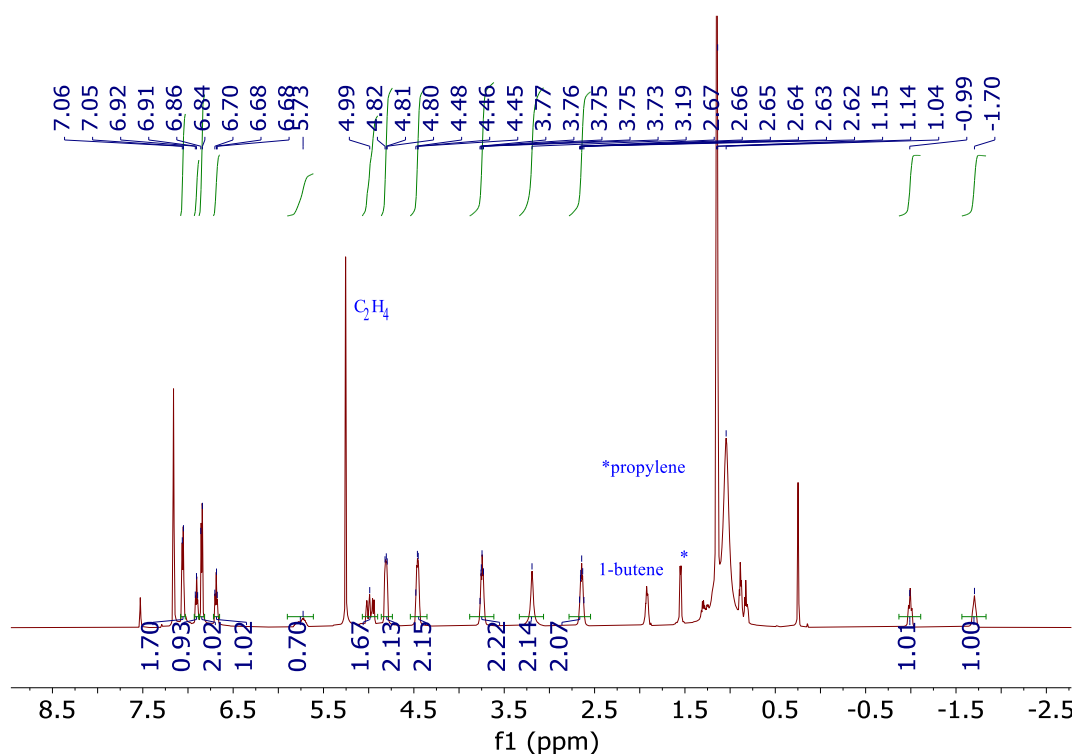

**Figure S51.**  $^1H$  NMR spectra of the  $W(NAr)(C_4H_8)(OR_{F9})_2$  after blue LED irradiation ( $\lambda=450$  nm) for 12 h in presence of 15 psi ethylene (300 MHz, 298K) in  $C_6D_6$ .

## Solution stability of $W(NAr)(ArNH_2)(OR_{F6})_2(C_2H_4)$

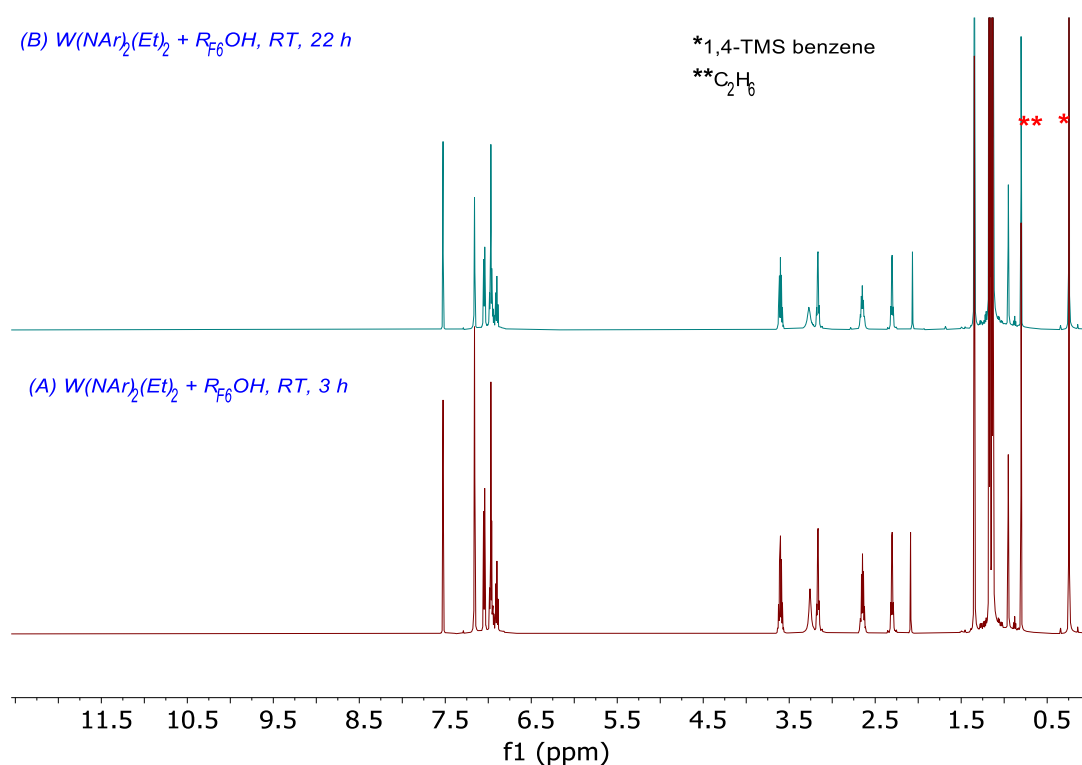

**Figure S52.**  $^1H$  NMR spectra showing solution stability of  $W(NAr)(ArNH_2)(OR_{F6})_2(C_2H_4)$  (600 MHz, 298K) in  $C_6D_6$ .

## Reaction of $W(NAr)(ArNH_2)(OR_{F6})_2(C_2H_4)$ with ethylene

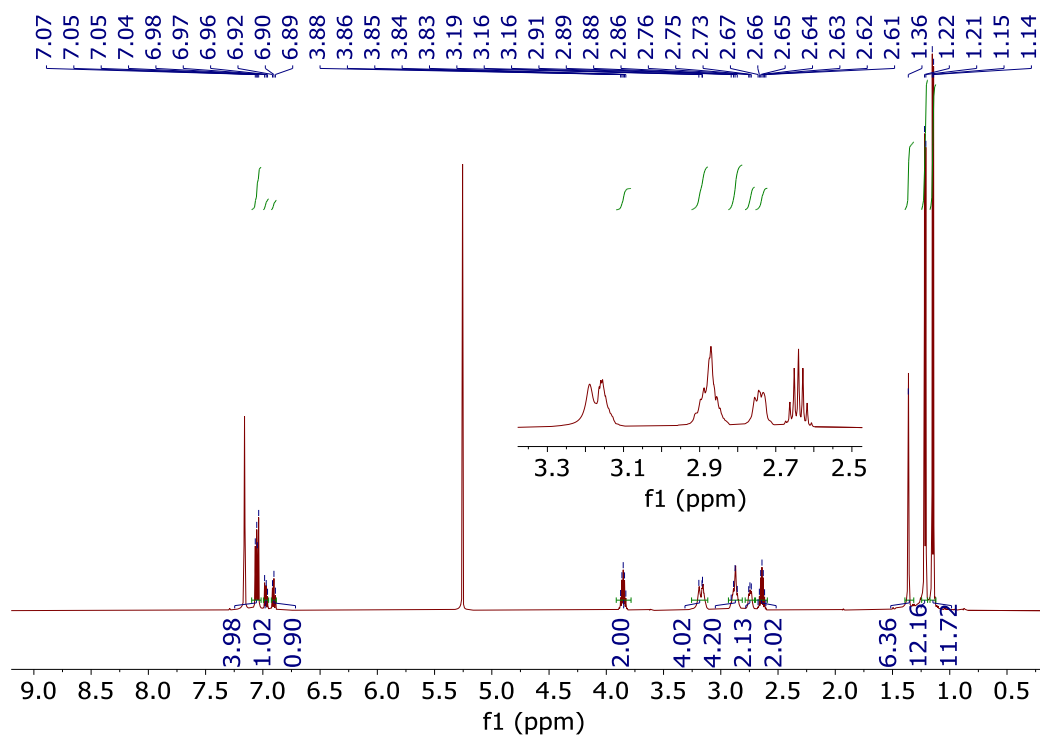

**Figure S53.**  $^1H$  NMR spectra of  $W(ArNH_2)(NAr)(OR_{F6})_2(C_2H_4)$  after 10 min of addition of ethylene (600 MHz, 298K) in  $C_6D_6$ .



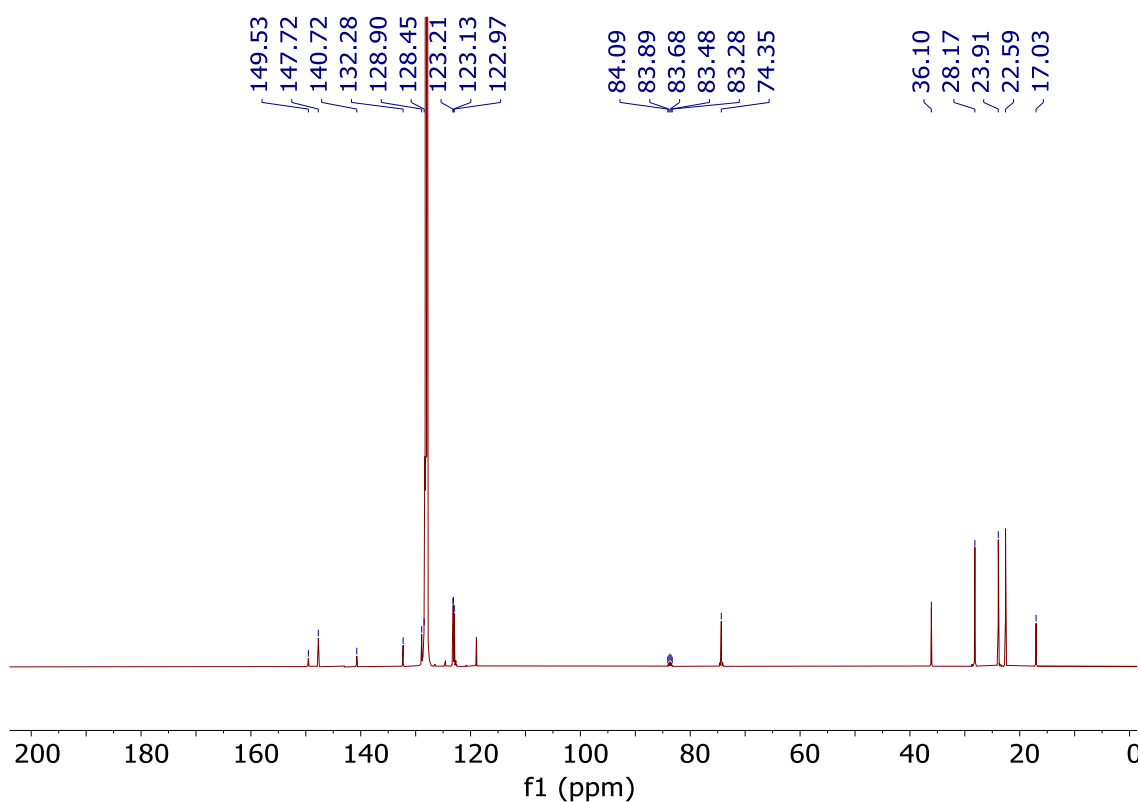

**Figure S54.**  $^{13}\text{C}$  NMR spectrum of the above reaction mixture (151 MHz, 298K) in  $\text{C}_6\text{D}_6$  ( $J_{\text{W-C}} = 73.6$  Hz).

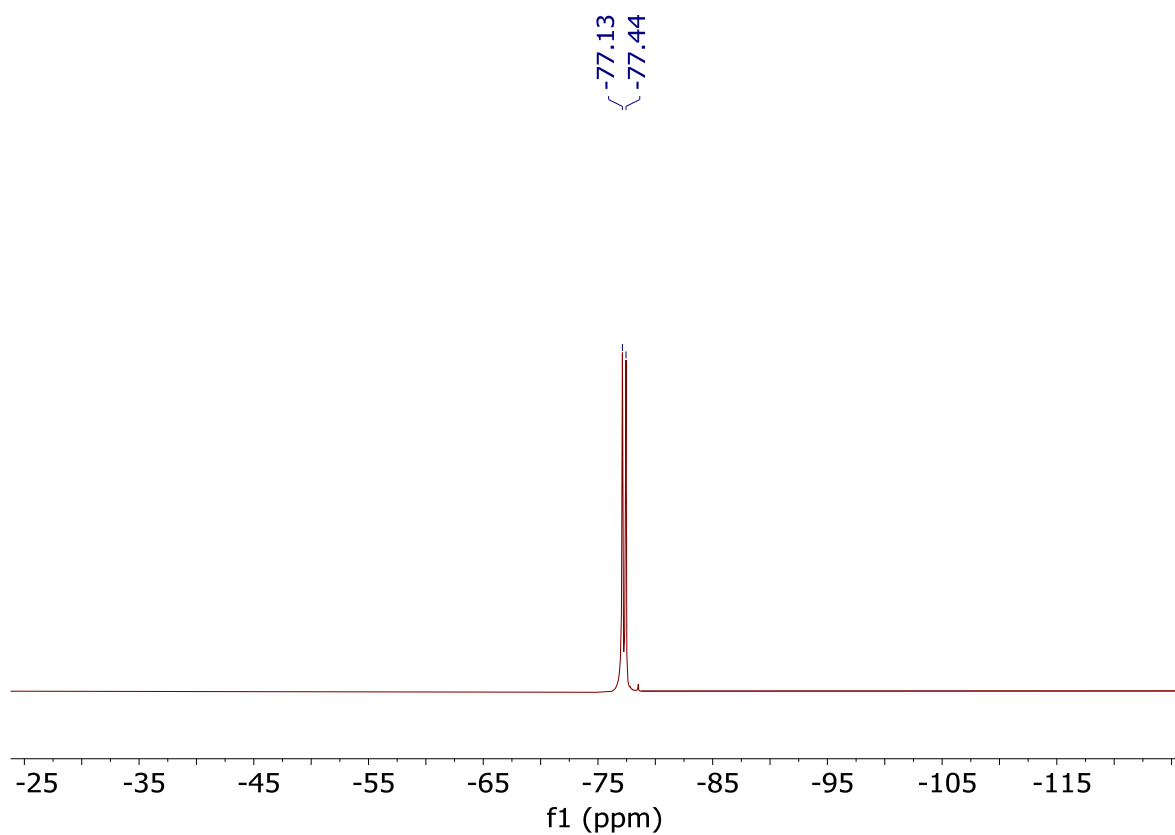

**Figure S55.**  $^{19}\text{F}$  NMR spectra of the above reaction mixture (564 MHz, 298K) in  $\text{C}_6\text{D}_6$ .

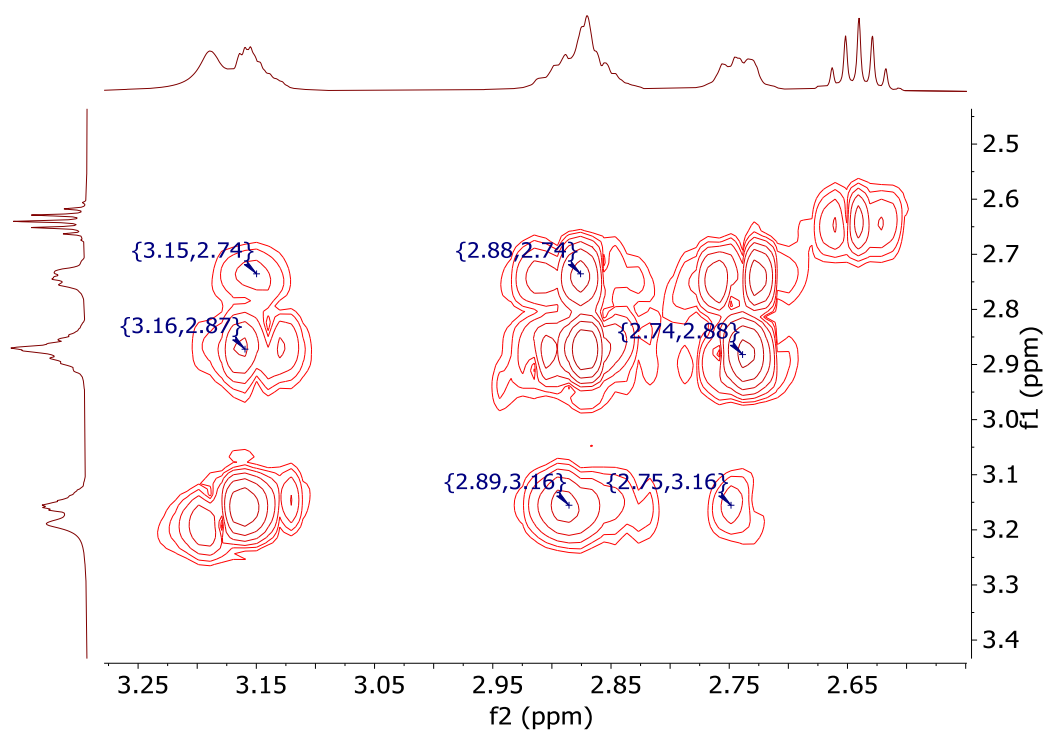

**Figure S56.** The aliphatic area of COSY spectrum of the above reaction mixture (600 MHz, 298K) in C<sub>6</sub>D<sub>6</sub>.

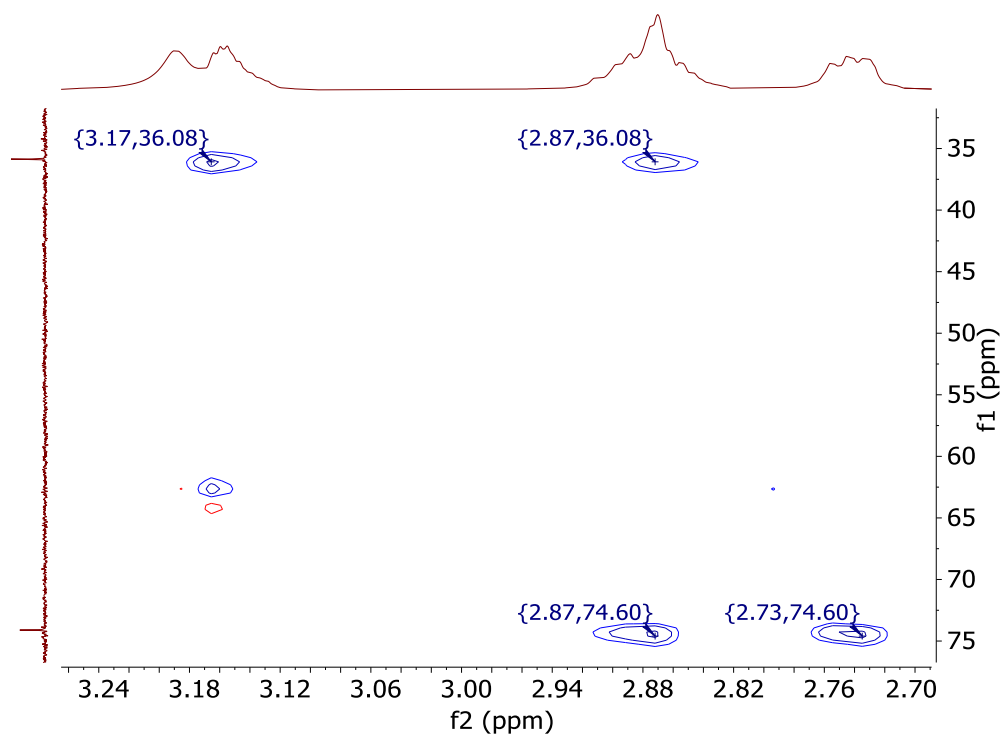

**Figure S57.** The Aliphatic area of HSQC {<sup>1</sup>H, <sup>13</sup>C} spectrum of above reaction mixture (600 MHz, 298K) in C<sub>6</sub>D<sub>6</sub>.

**Photolysis of  $W(NAr)(OR_F)_2(C_4H_8)$**

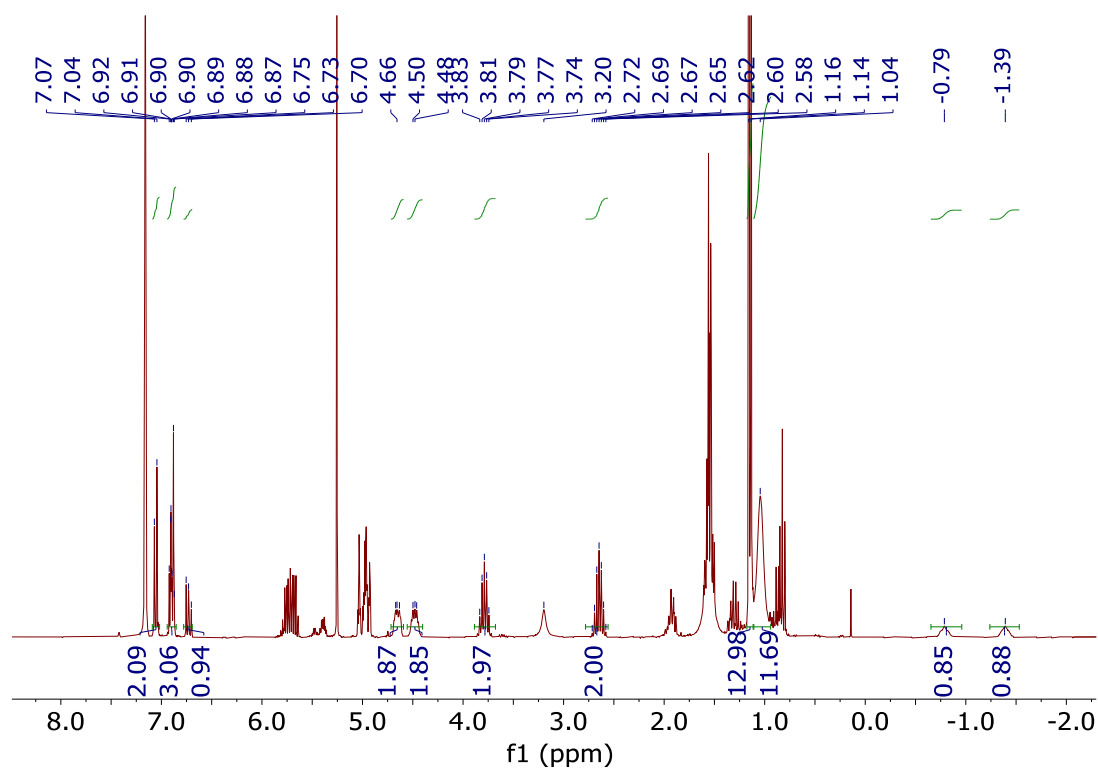

**Figure S58.** <sup>1</sup>H NMR spectra of the above reaction mixture after blue LED irradiation (450 nm) for 12 h after in presence of 15 psi ethylene (300 MHz, 298K) in C<sub>6</sub>D<sub>6</sub>.

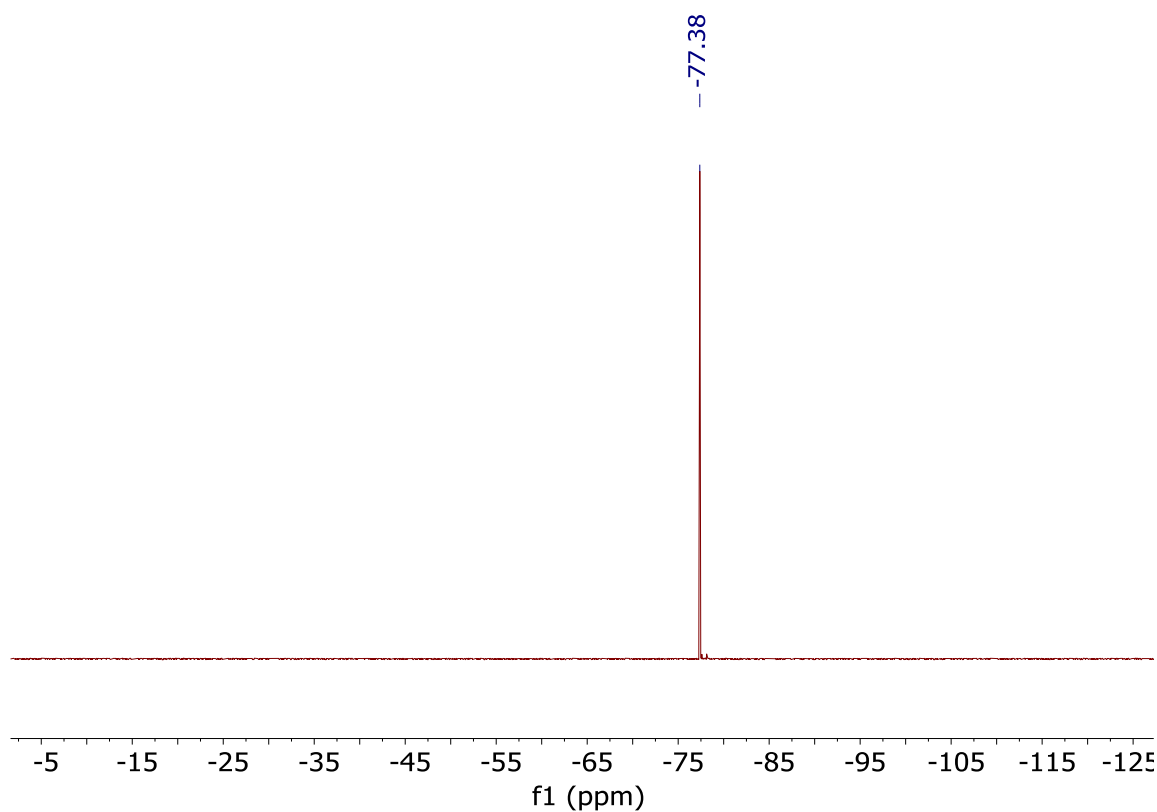

**Figure S59.** <sup>19</sup>F NMR spectra of the above reaction mixture (282 MHz, 298K) in C<sub>6</sub>D<sub>6</sub>.

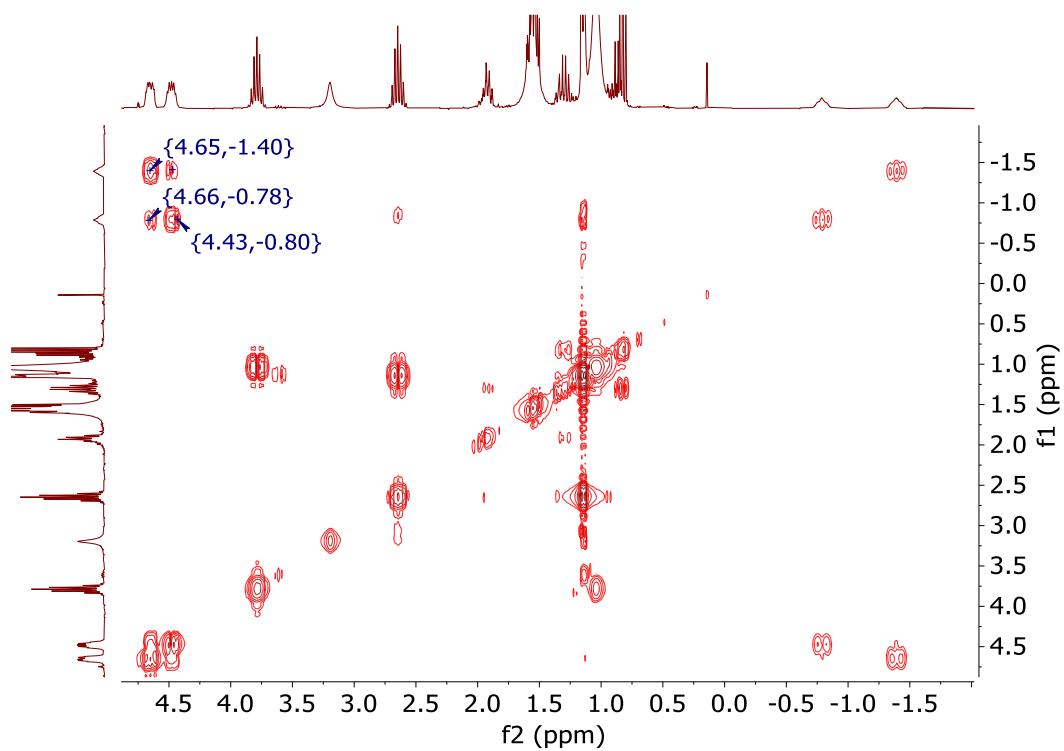

**Figure S60.** The aliphatic area of COSY spectrum of the above reaction mixture (300 MHz, 298K) in C<sub>6</sub>D<sub>6</sub>.

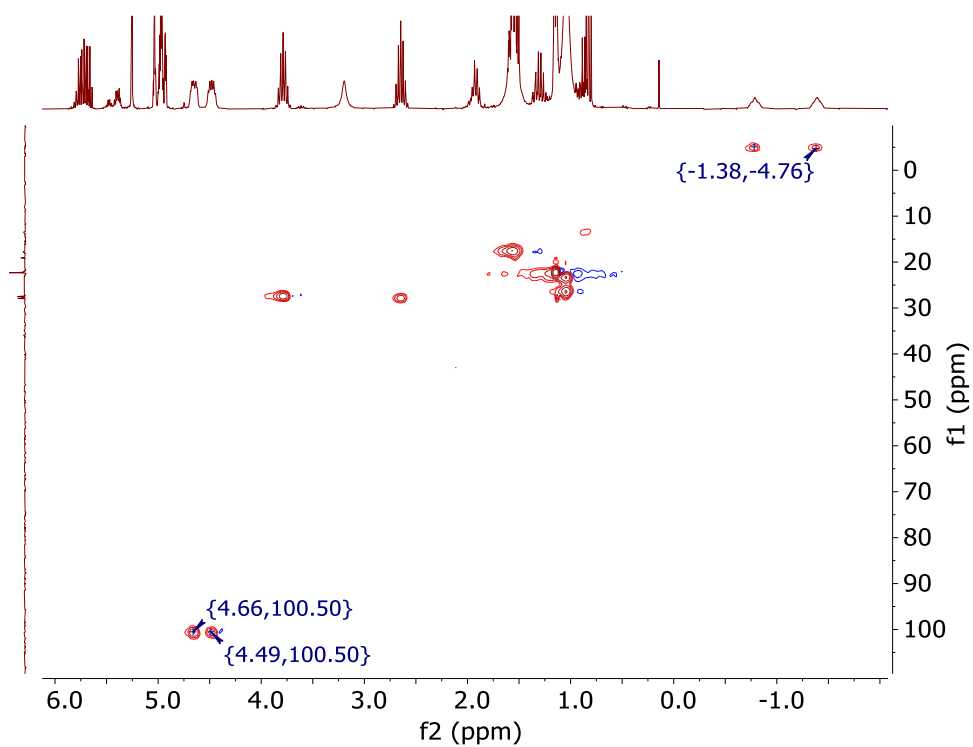

**Figure S61.** The Aliphatic area of HSQC {<sup>1</sup>H, <sup>13</sup>C} spectrum of the above reaction mixture (300 MHz, 298K) in C<sub>6</sub>D<sub>6</sub>.

Reaction of  $W(NAr)(ArNH_2)(OR_{F3})_2(C_2H_4)$  with ethylene

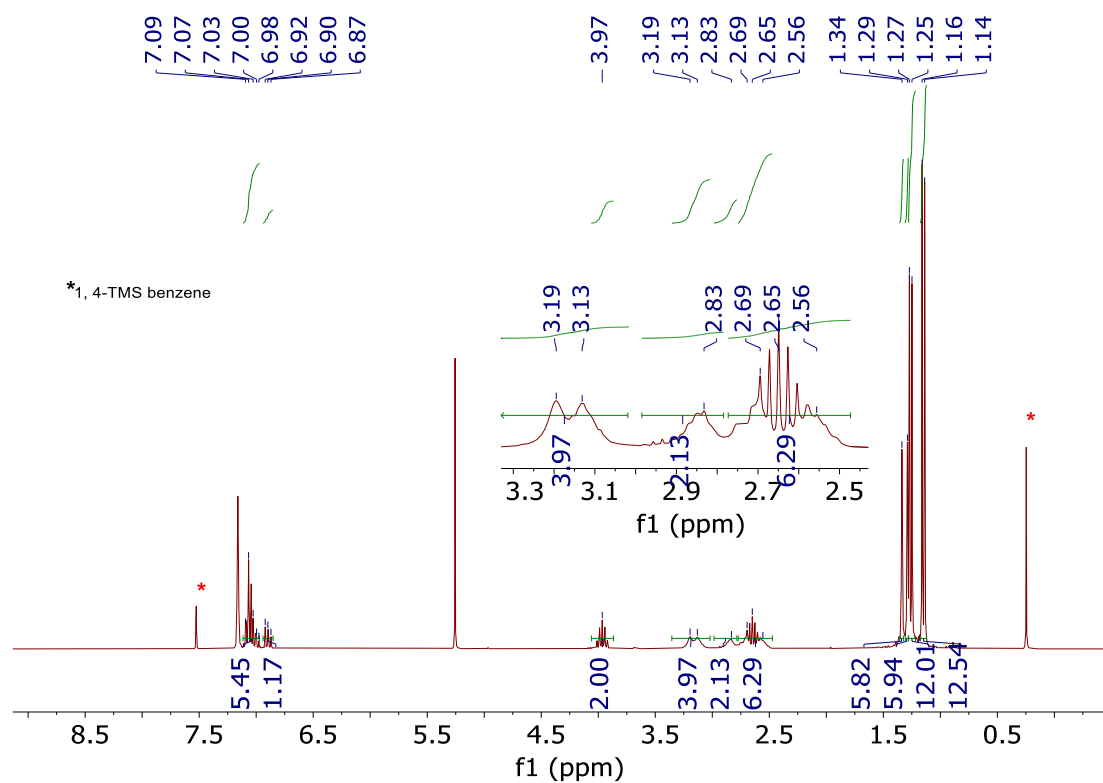

**Figure S62.**  $^1H$  NMR spectra of  $W(NAr)(ArNH_2)(OR_{F3})_2(C_2H_4)$  after 10 min of addition of ethylene (600 MHz, 298K) in  $C_6D_6$ .

MM-3P-26B-W(NAr)2Et2+F3ROH-24Feb-c6d6.10.fid  
2d-vac-C2H4-10min-19F

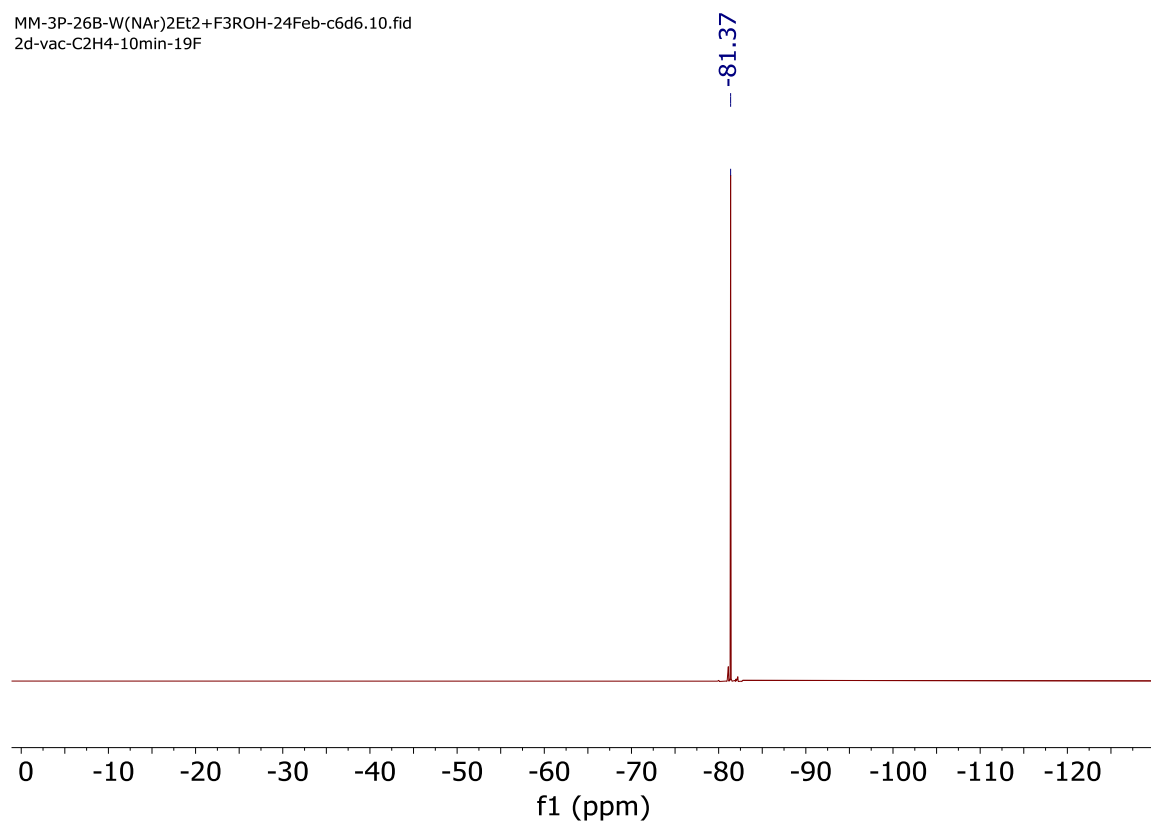

**Figure S63.**  $^{19}F$  NMR spectra of the above reaction mixture (282 MHz, 298K) in  $C_6D_6$ .

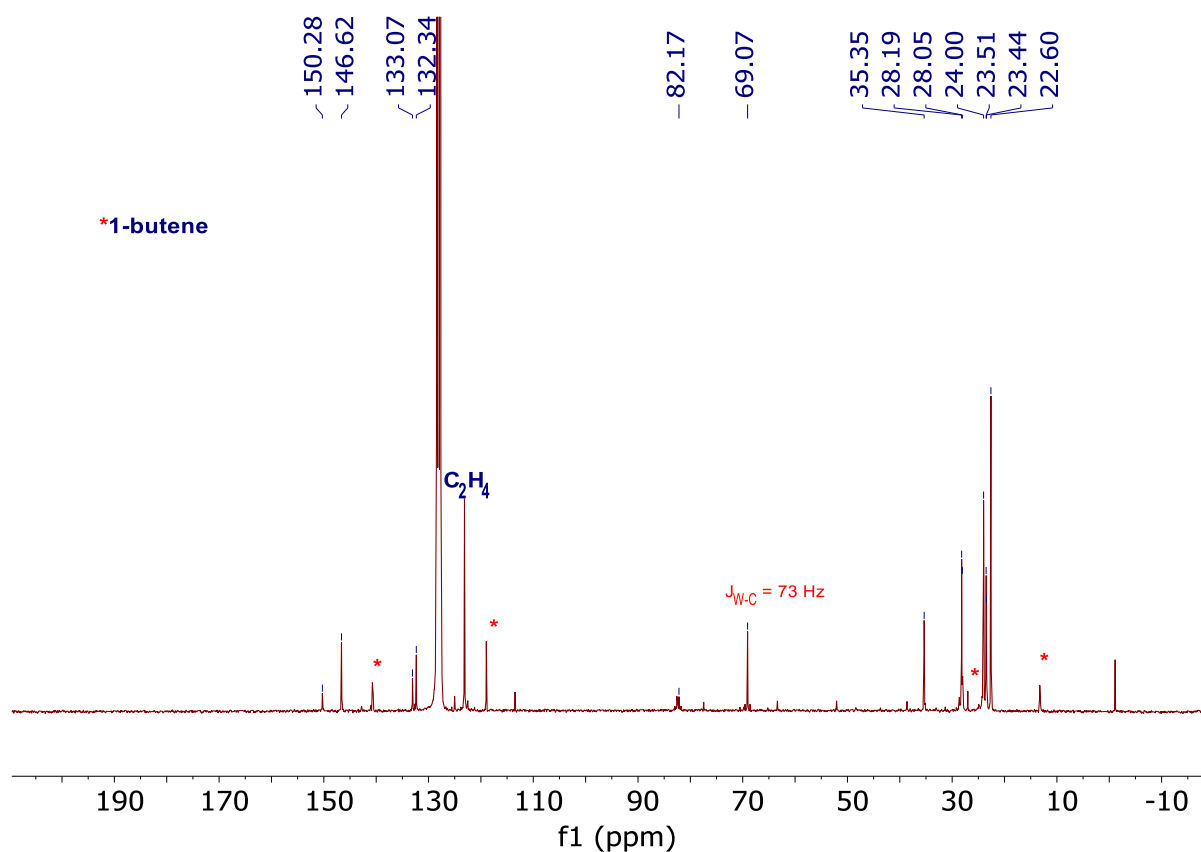

**Figure S64.**  $^{13}\text{C}$  NMR spectrum of the above reaction mixture (75 MHz, 298K) in  $\text{C}_6\text{D}_6$ .

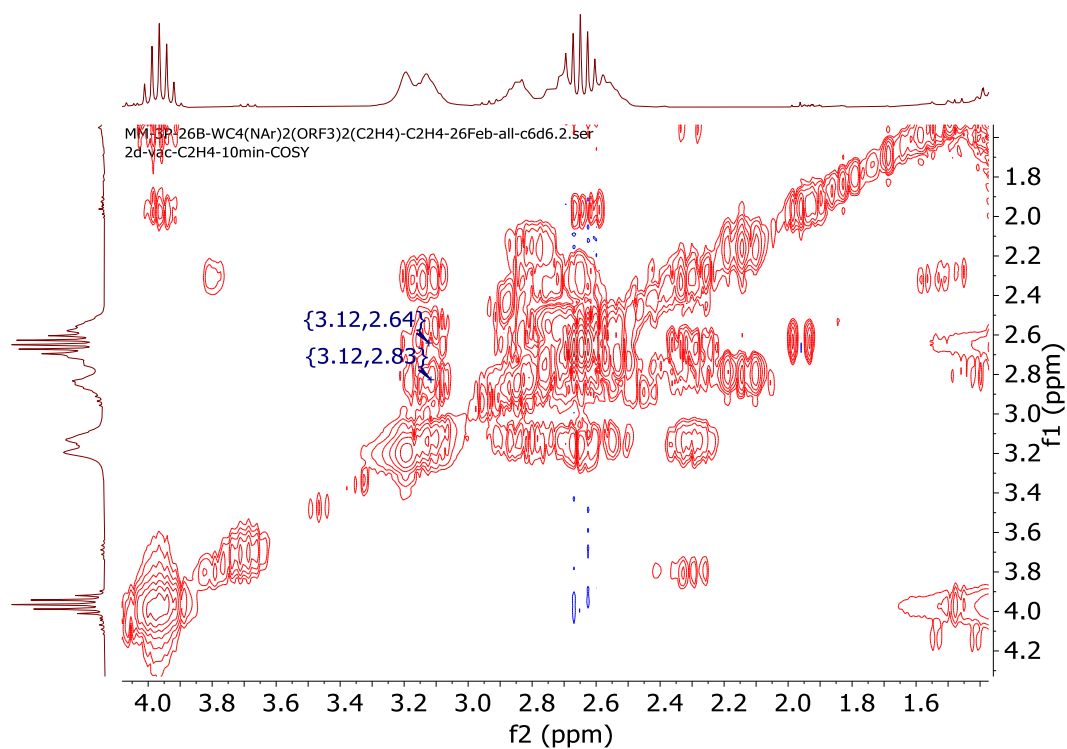

**Figure S65.** The Aliphatic area of COSY spectrum of the above reaction mixture (300 MHz, 298K) in  $\text{C}_6\text{D}_6$ .

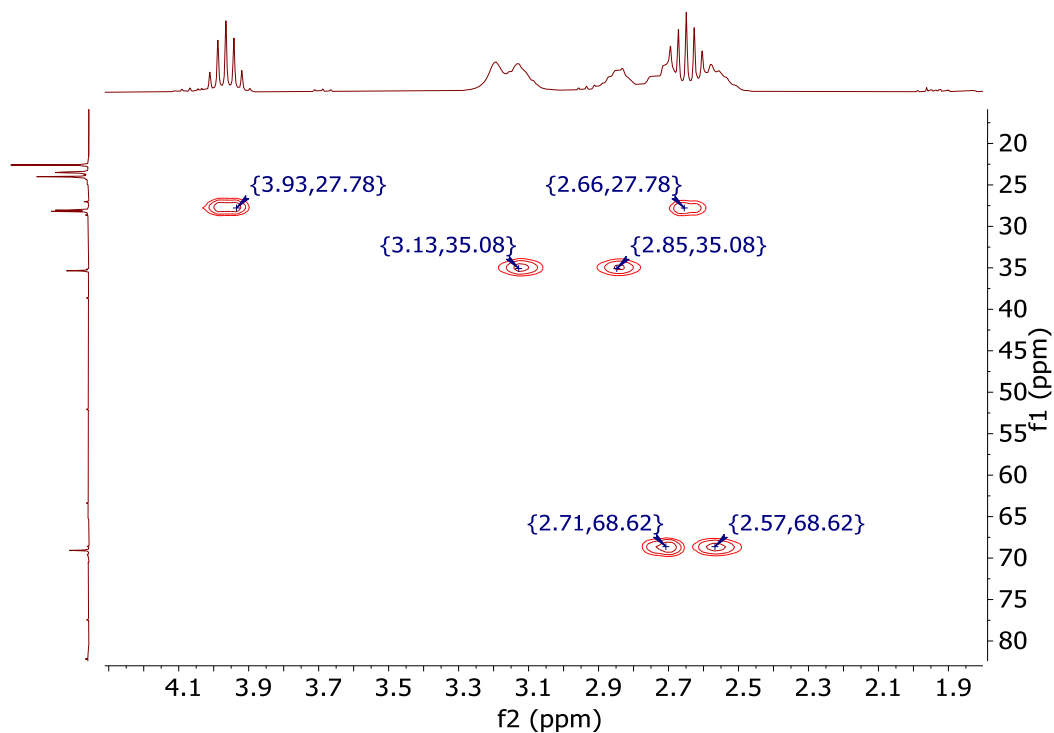

**Figure S66.** The aliphatic area of HSQC  $\{^1\text{H}, ^{13}\text{C}\}$  spectrum of the above reaction mixture (300 MHz, 298K) in  $\text{C}_6\text{D}_6$ .

### ArNH<sub>2</sub> promoted formation of W(NAr)(Ar'NH)(ArNH<sub>2</sub>)(OR<sub>F9</sub>)

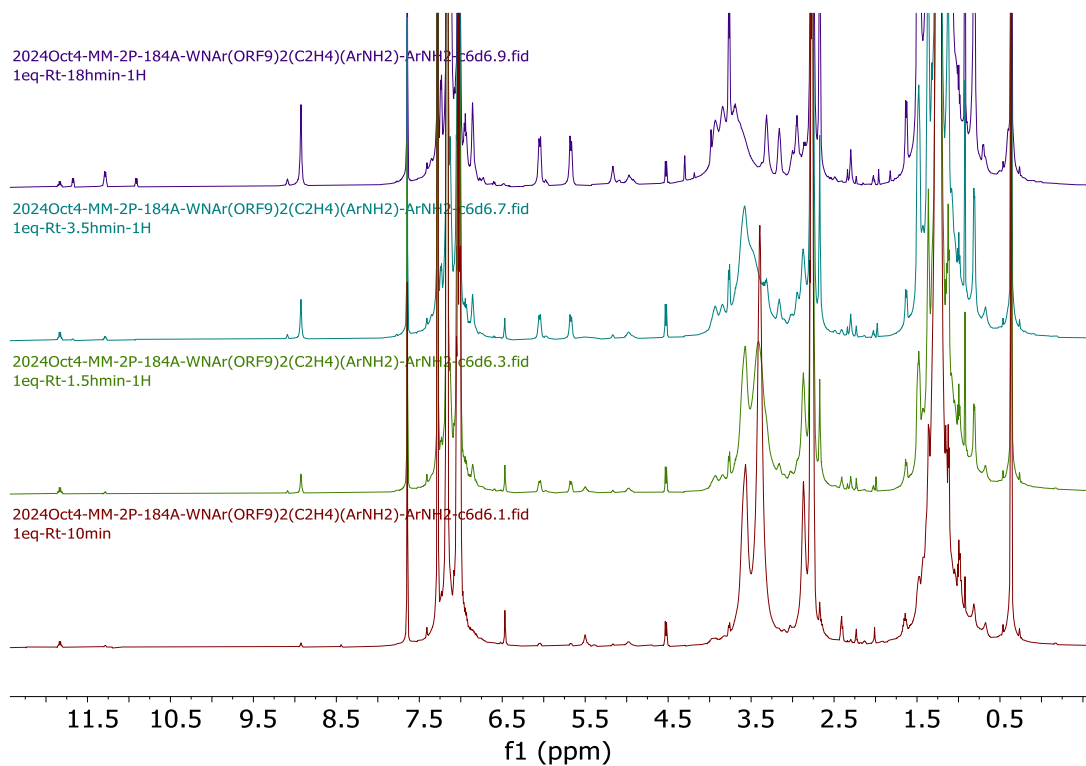

**Figure S67.**  $^1\text{H}$  NMR spectra showing the reaction of  $\text{W}(\text{NAr})(\text{ArNH}_2)(\text{OR}_{\text{F9}})_2(\text{C}_4\text{H}_8)$  with  $\text{ArNH}_2$  (1 eq) at ambient temperature (600 MHz, 298K) in  $\text{C}_6\text{D}_6$ .

# Reaction of $W(NAr)(ArNH_2)(OR_{F9})_2(C_2H_4)$ with 2,6-lutidine

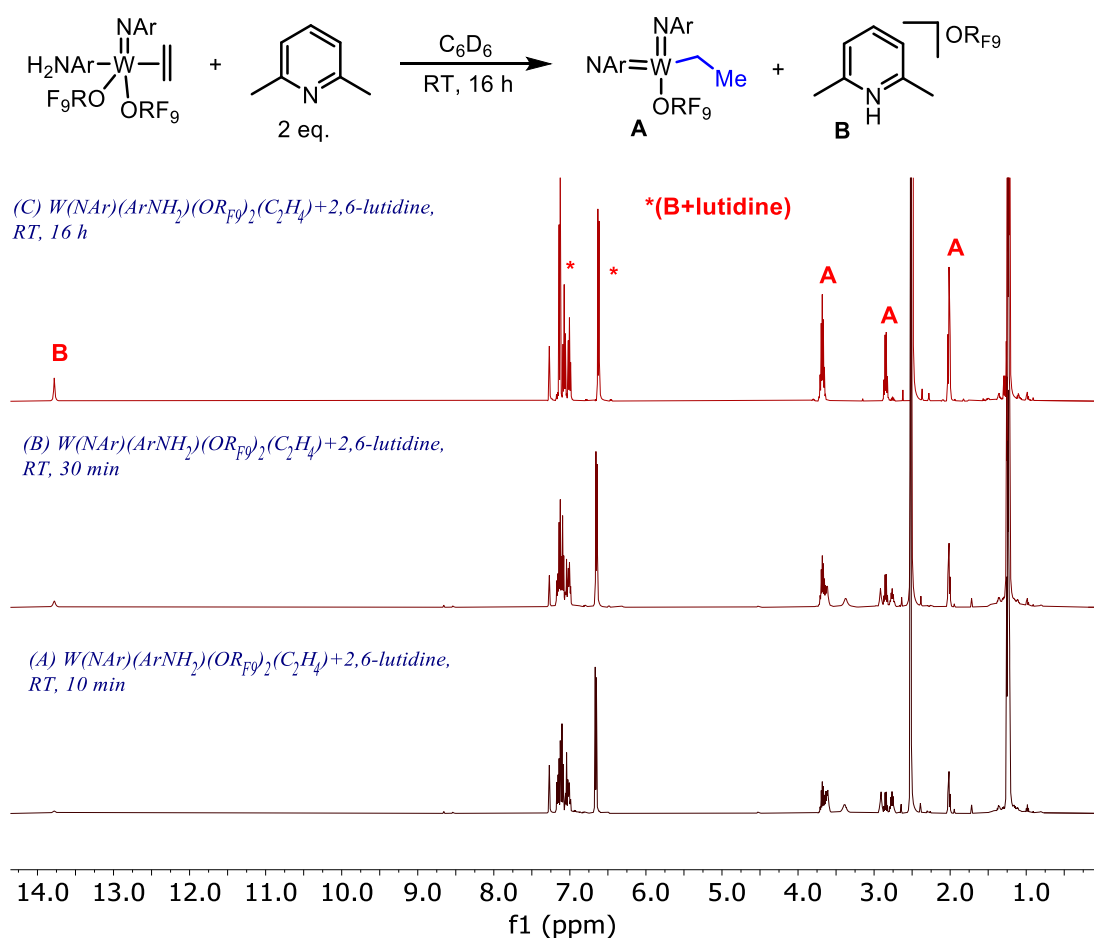

**Figure S68.** <sup>1</sup>H NMR spectra showing the reaction of  $W(NAr)(ArNH_2)(OR_{F9})_2(C_4H_8)$  with 2,6-lutidine (2 equiv) at ambient temperature (600 MHz, 298K) in  $C_6D_6$ .



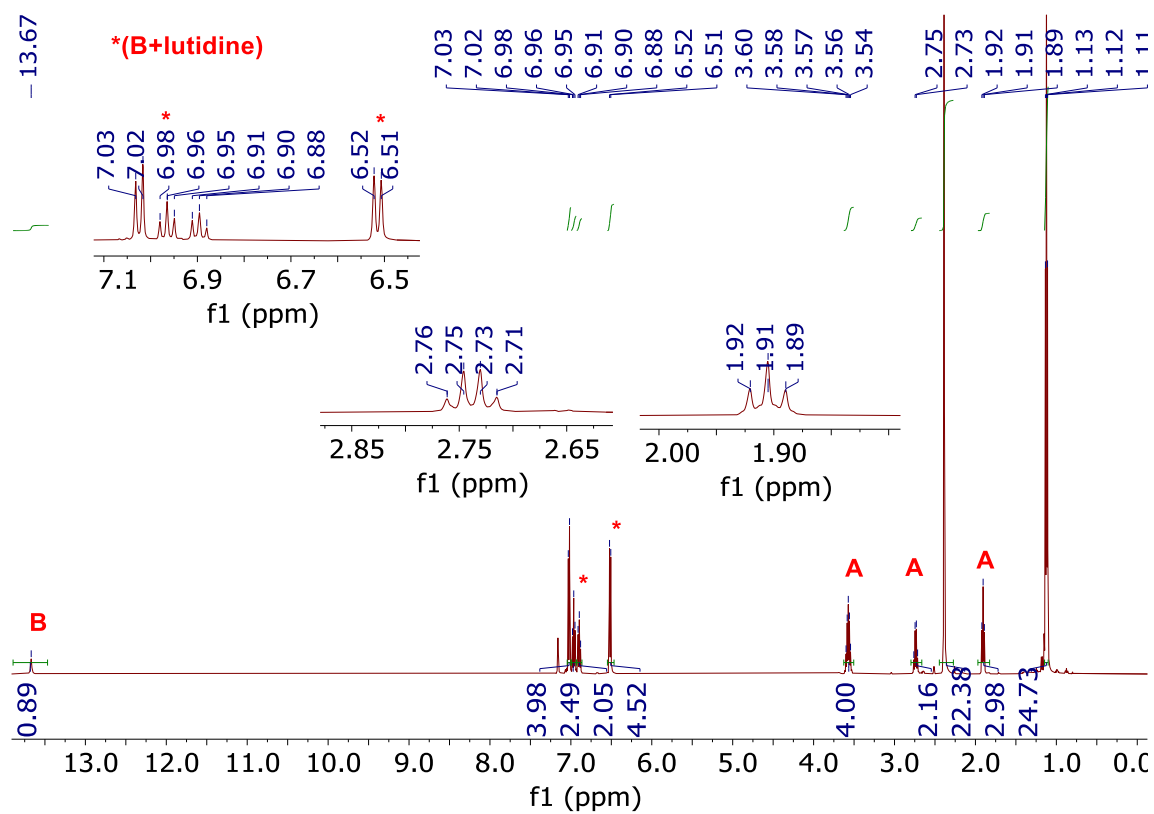

**Figure S69.**  $^1\text{H}$  NMR spectra of the above reaction mixture (600 MHz, 298K) in  $\text{C}_6\text{D}_6$ .

# **Reaction of $W(NAr)(ArNH_2)(OR_{F9})_2(C_2H_4)$ with cyclohexene**

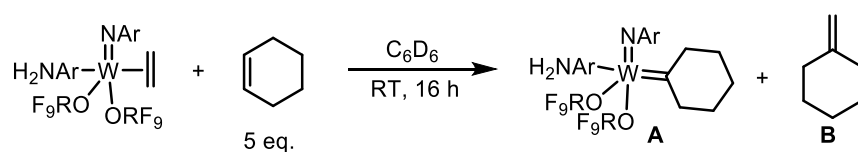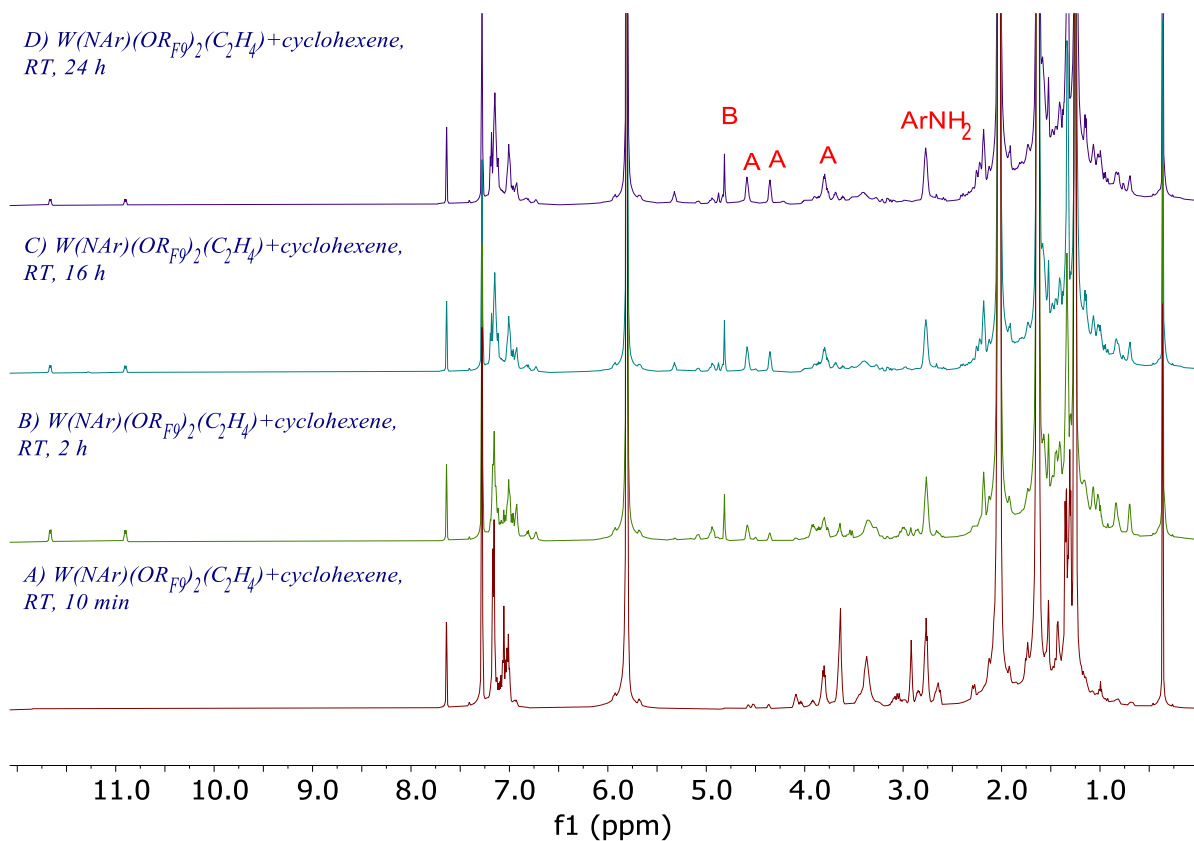

**Figure S70.**  $^1\text{H}$  NMR spectra showing the reaction of  $W(NAr)(ArNH_2)(OR_{F9})_2(C_4H_8)$  with cyclohexene (5 eq) at 100 °C (600 MHz, 298K) in  $\text{C}_6\text{D}_6$ .

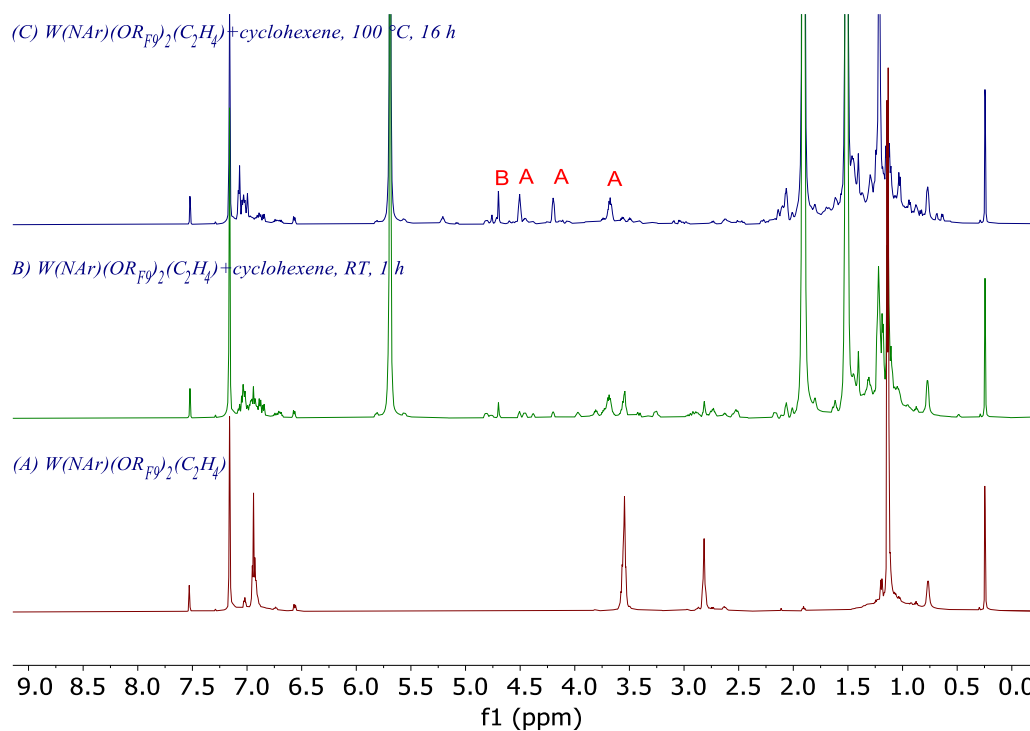

**Figure S71.**  $^1\text{H}$  NMR spectra showing the reaction of  $\text{W}(\text{NAr})(\text{OR}_{\text{F9}})_2(\text{C}_2\text{H}_4)$  with cyclohexene (5 eq) at  $100\text{ }^\circ\text{C}$  (600 MHz, 298K) in  $\text{C}_6\text{D}_6$ .

#### Reaction of $\text{W}(\text{NAr})(\text{Ar}'\text{NH})(\text{ArNH}_2)(\text{OR}_{\text{F9}})$ with ethylene

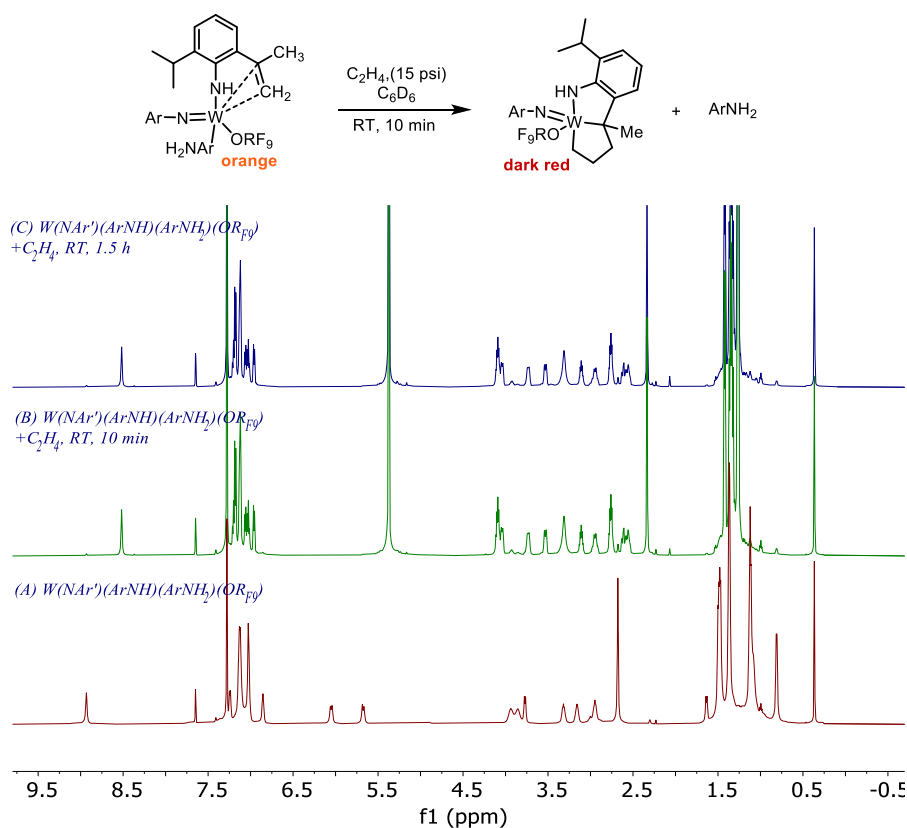

**Figure S72.**  $^1\text{H}$  NMR spectra showing the reaction of  $\text{W}(\text{NAr}')(\text{Ar}'\text{NH})(\text{ArNH}_2)(\text{OR}_{\text{F9}})$  with ethylene at room temperature (600 MHz, 298K) in  $\text{C}_6\text{D}_6$ .

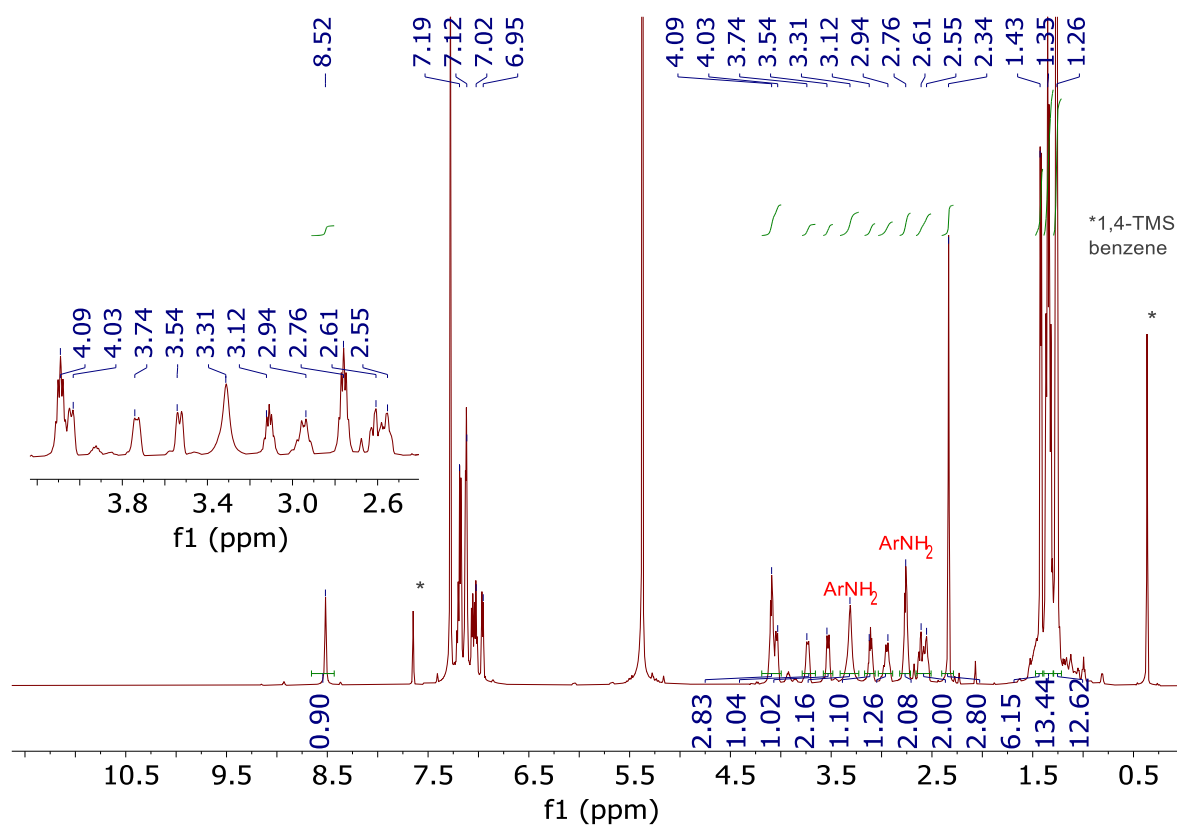

**Figure S73.**  $^1\text{H}$  NMR spectra of the above reaction mixture (600 MHz, 298K) in  $\text{C}_6\text{D}_6$ .

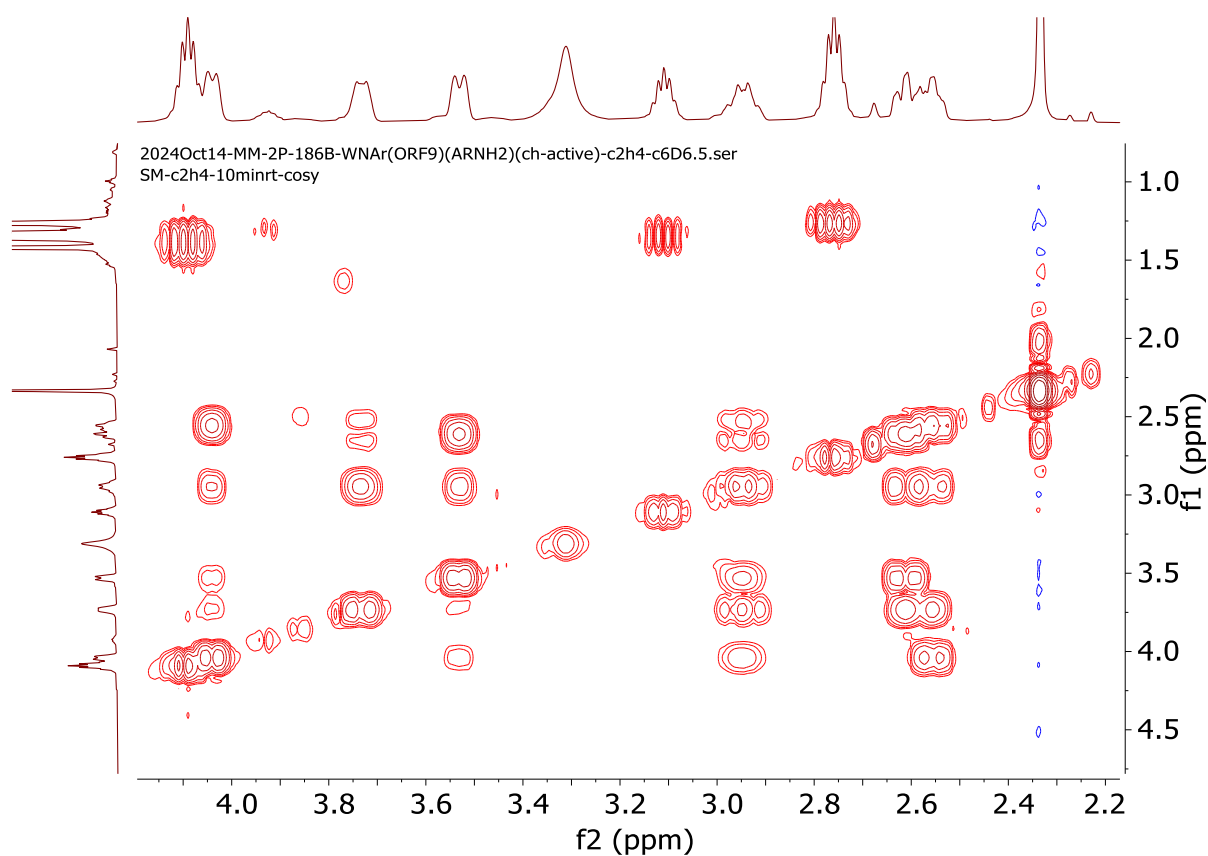

**Figure S74.** The aliphatic area of COSY spectrum of the above reaction mixture (600 MHz, 298K) in  $\text{C}_6\text{D}_6$ .

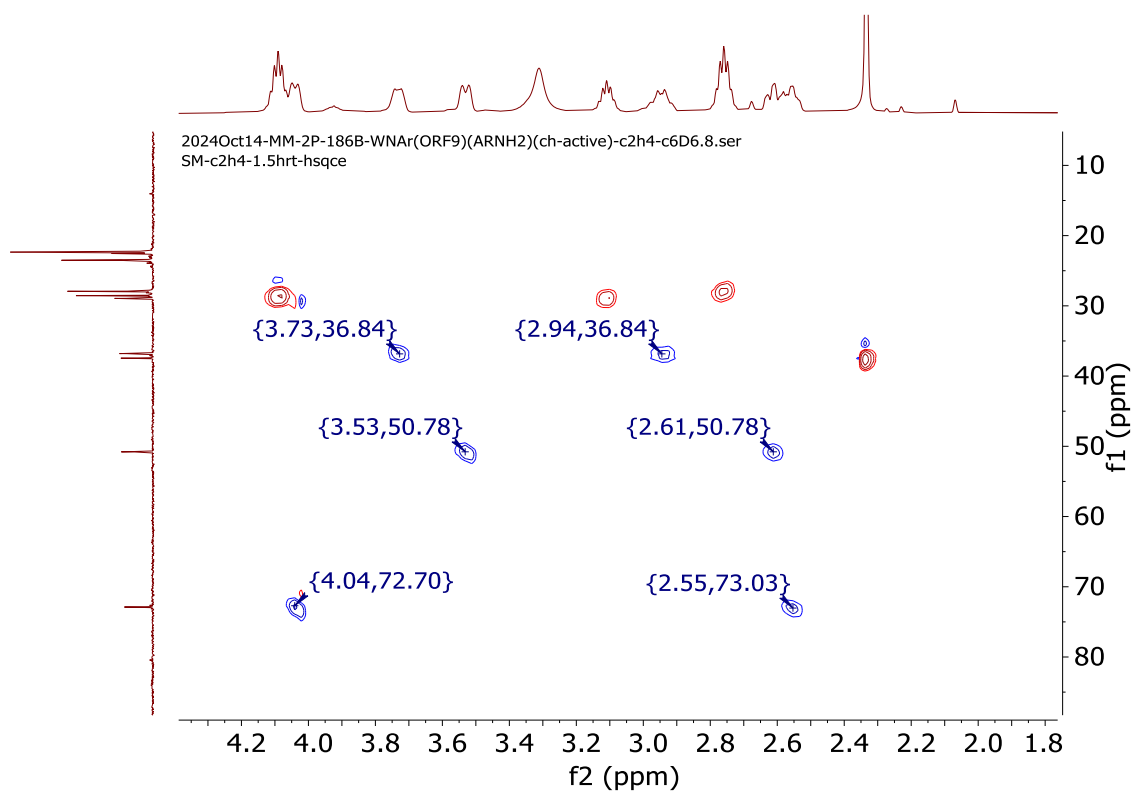

**Figure S75.** The aliphatic area of HSQC  $\{^1\text{H}, ^{13}\text{C}\}$  spectrum of the above reaction mixture (600 MHz, 298K) in  $\text{C}_6\text{D}_6$ .

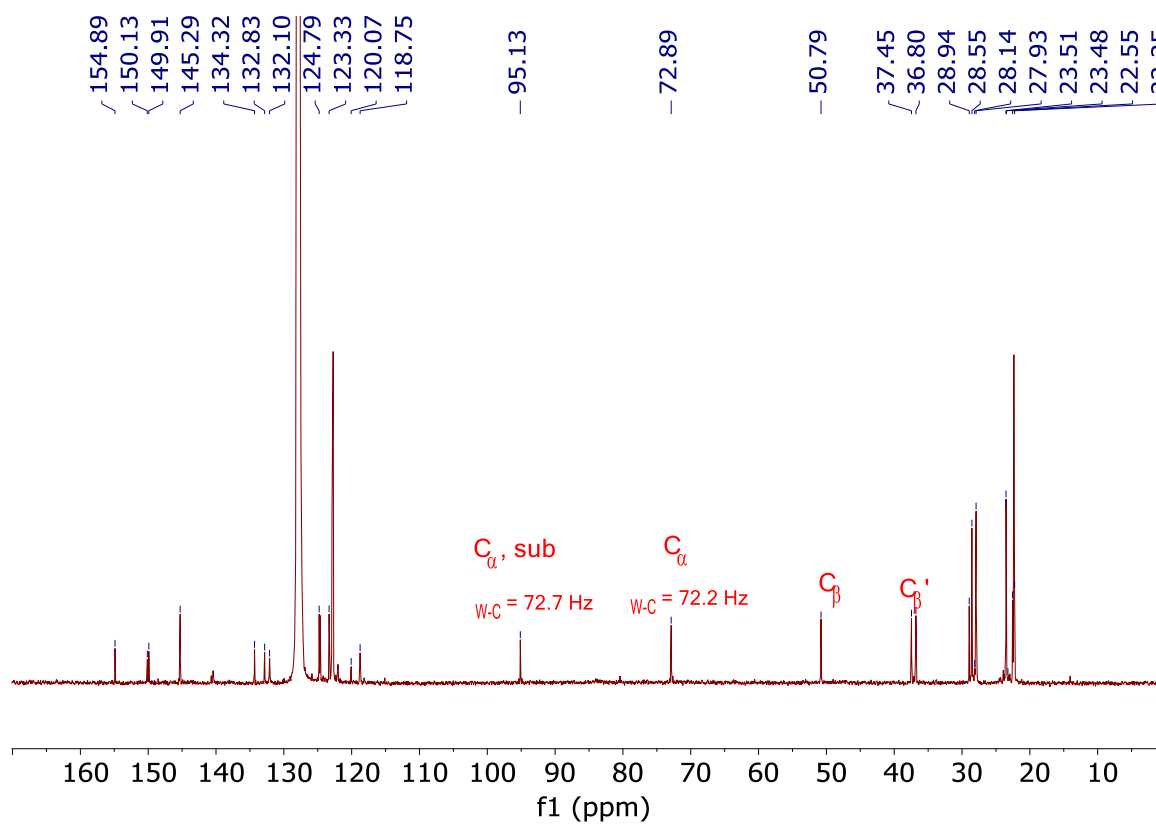

**Figure S76.**  $^{13}\text{C}$  NMR spectrum of the above reaction mixture (75 MHz, 298K) in  $\text{C}_6\text{D}_6$ .

## Solution stability of $W(NAr)(Ar'NH)(ArNH_2)(OR_{F9})$ in absence of ethylene

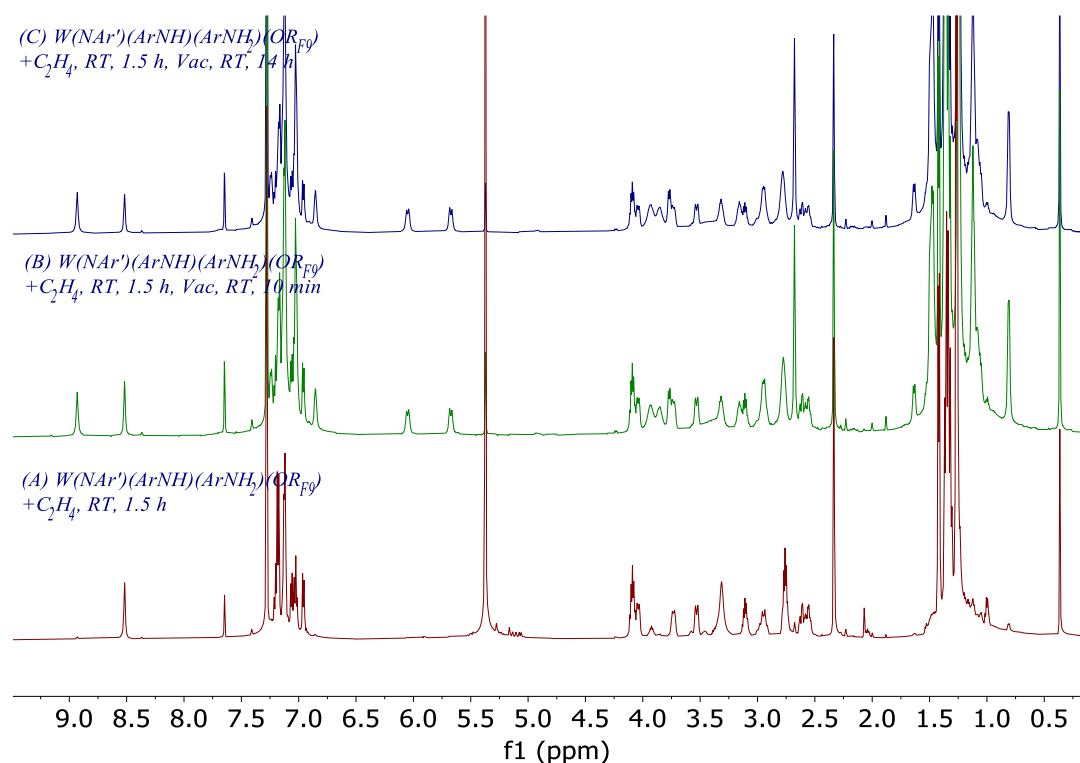

**Figure S77.**  $^1H$  NMR spectra showing that the reaction mixture of figure S65 starts to form  $W(NAr)(ArNH_2)(OR_{F9})_2(C_2H_4)$  in absence of ethylene (600 MHz, 298K) in  $C_6D_6$ .

## Reaction of $W(NAr)(Ar'NH)(ArNH_2)(OR_{F9})$ with cyclohexene

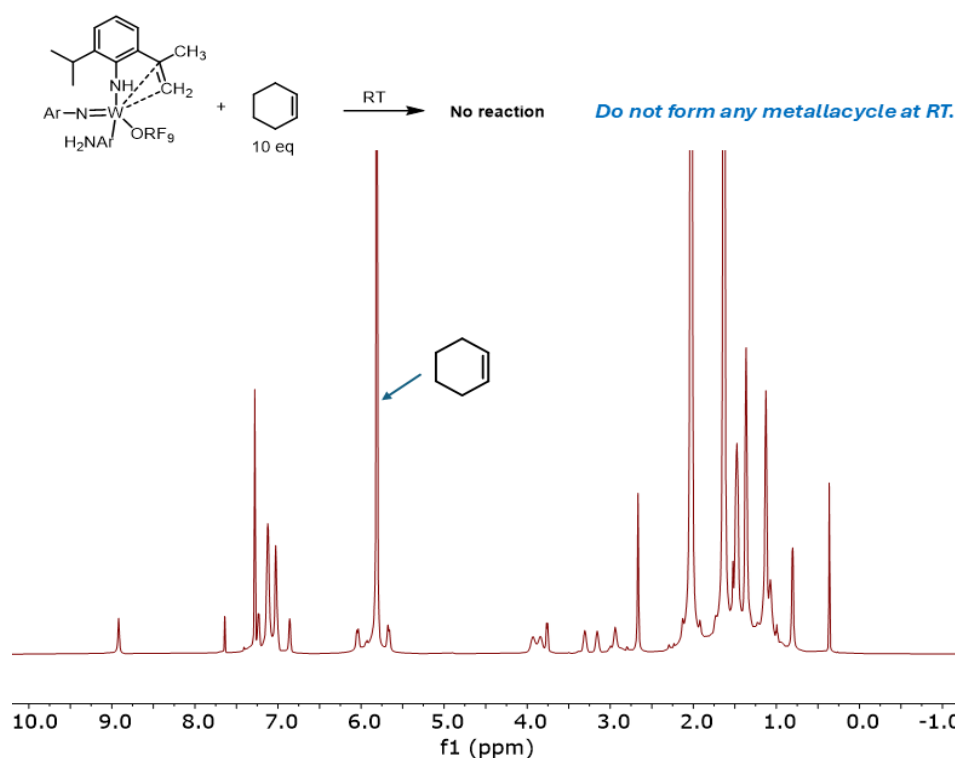

**Figure S78.**  $^1H$  NMR spectra for the reaction of  $W(NAr)(Ar'NH)(ArNH_2)(OR_{F9})$  with cyclohexene at room temperature (600 MHz, 298K) in  $C_6D_6$ .

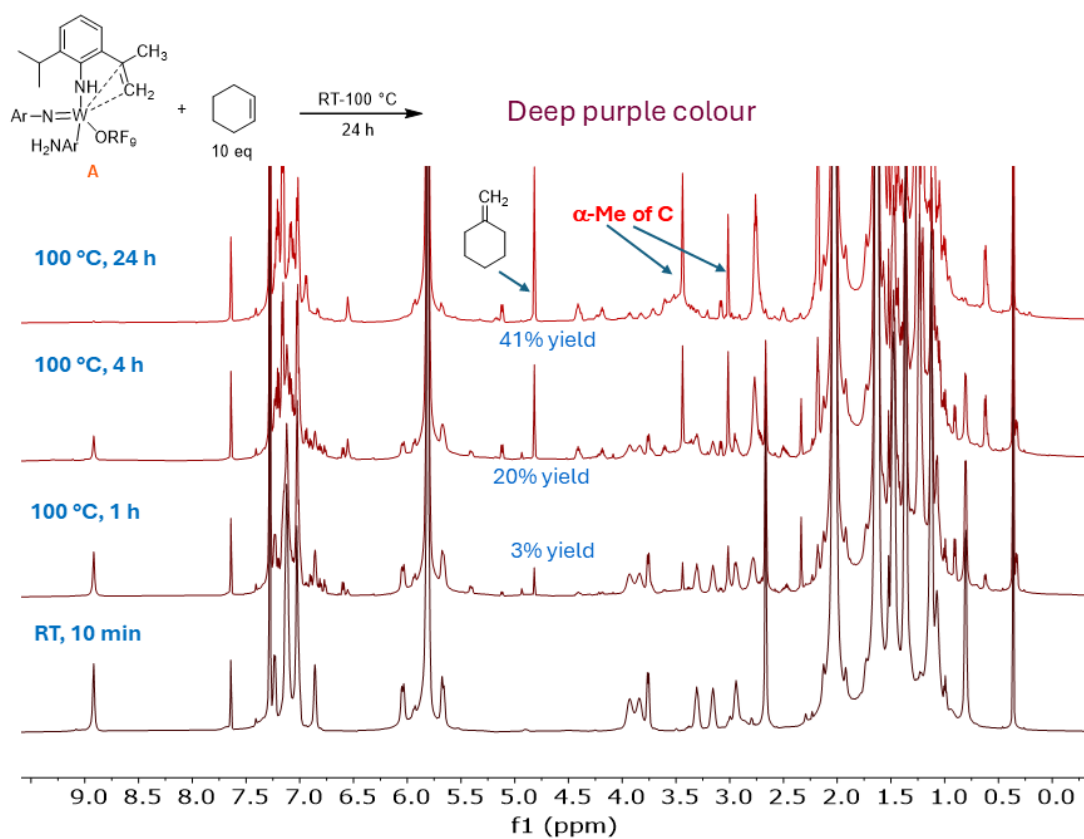

**Figure S79.**  $^1\text{H}$  NMR spectra for the reaction of  $\text{W}(\text{NAr})(\text{Ar}'\text{NH})(\text{ArNH}_2)(\text{ORF}_9)$  with cyclohexene at 100 °C for 24 h (600 MHz, 298K) in  $\text{C}_6\text{D}_6$ .

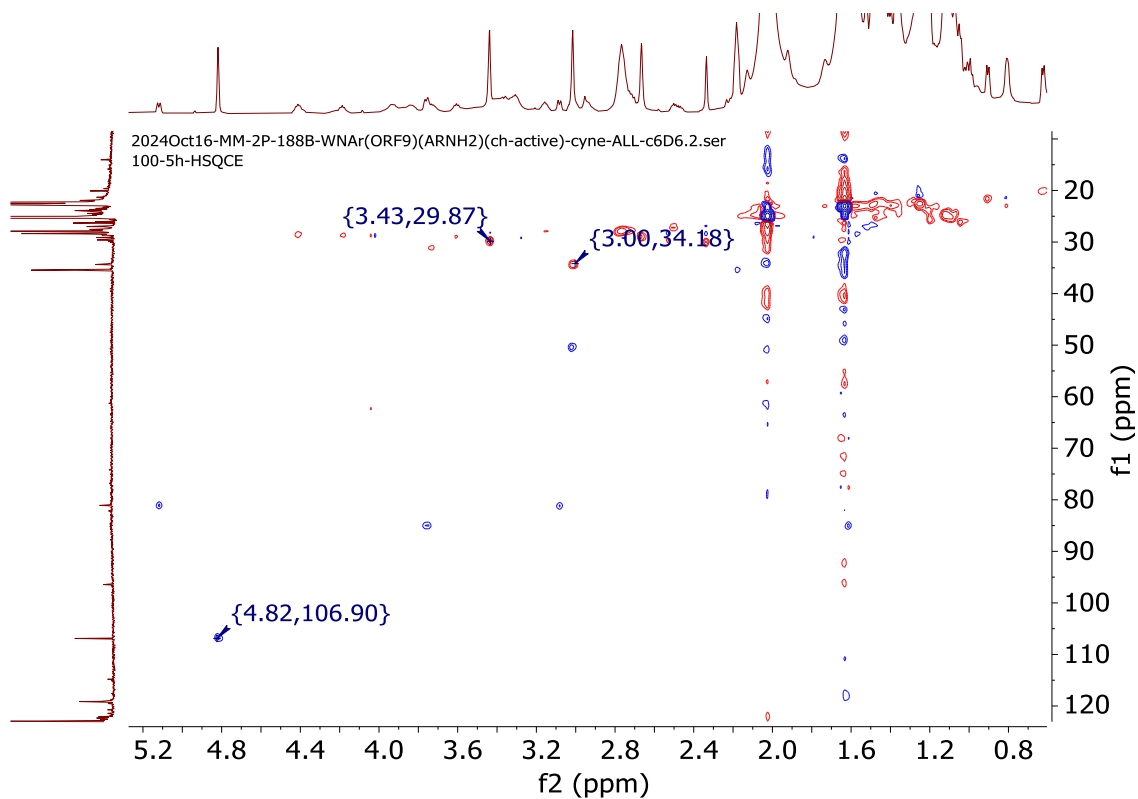

**Figure S80.** Aliphatic area of HSQC  $\{^1\text{H}, ^{13}\text{C}\}$  spectrum of the above mixture in  $\text{C}_6\text{D}_6$  (151 MHz, 298K).

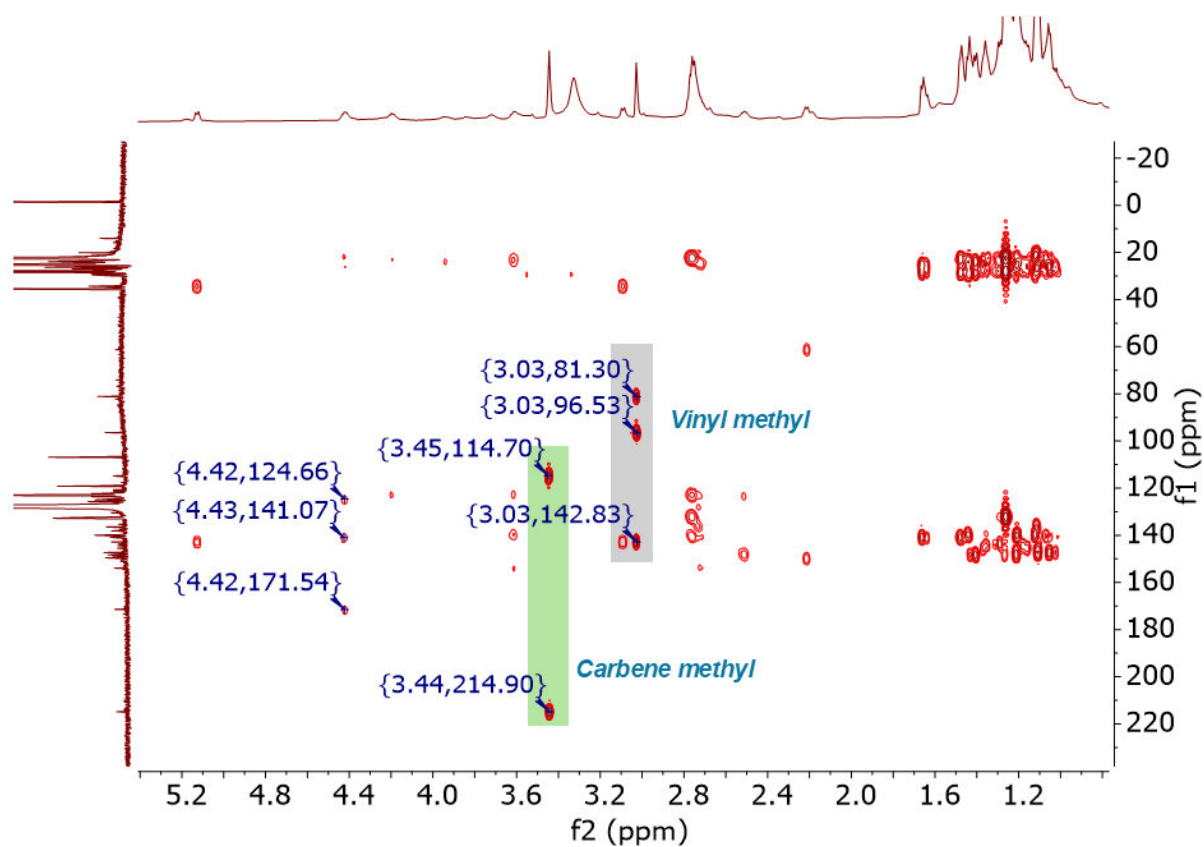

**Figure S81.** Aliphatic area of HMBC  $\{^1\text{H}, ^{13}\text{C}\}$  of the above reaction mixture in  $\text{C}_6\text{D}_6$  (151 MHz, 298K).

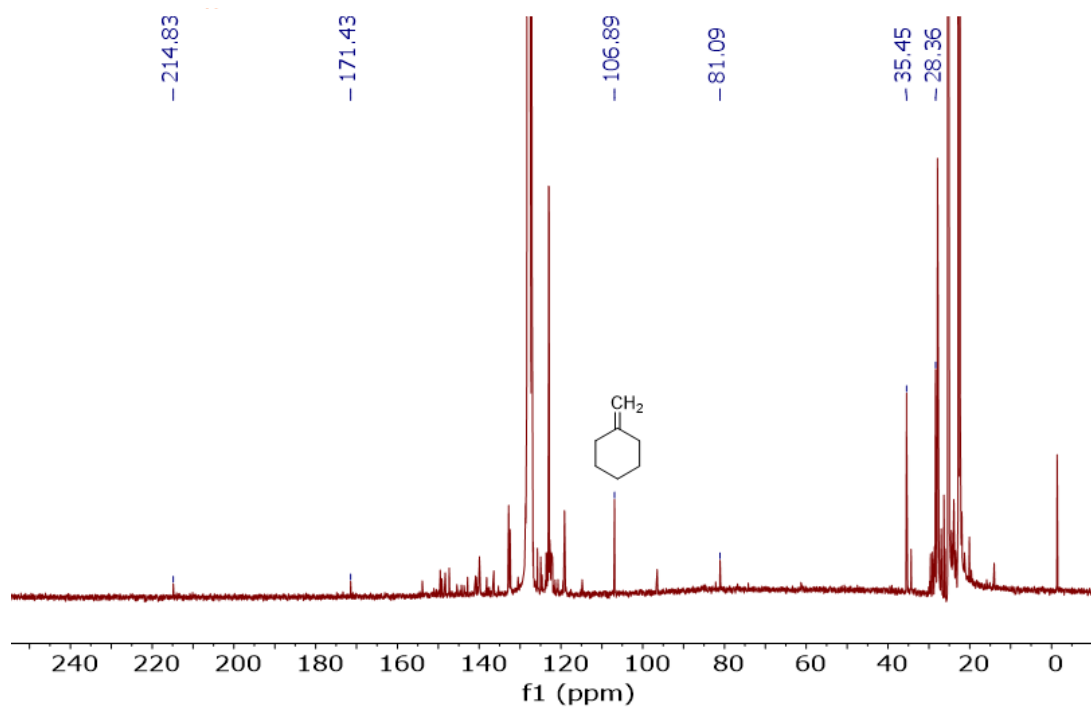

**Figure S82.**  $^{13}\text{C}$  NMR spectra of the above reaction mixture in  $\text{C}_6\text{D}_6$  (151 MHz, 298K).



#### 4. Syntheses of other ethylene complexes

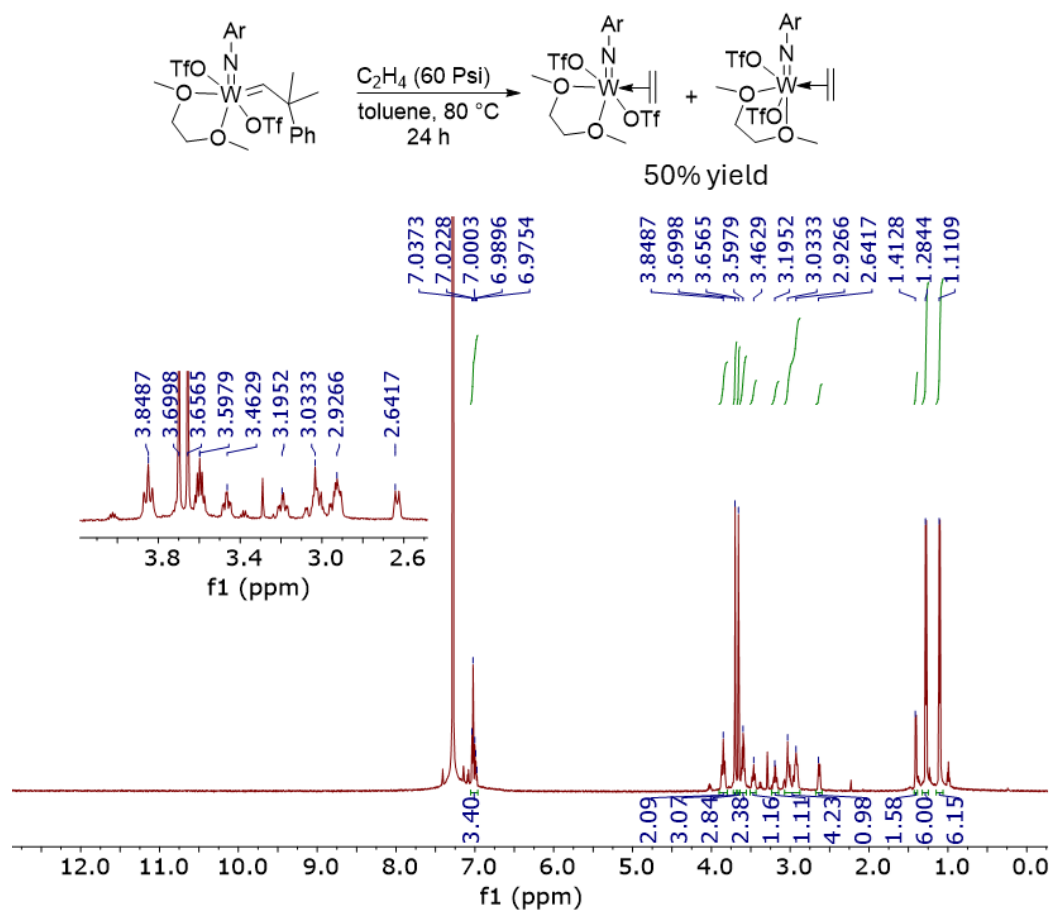

**Figure S83.** <sup>1</sup>H NMR spectra of the reaction of W(NAr)(CHCMe<sub>2</sub>Ph)(OTf)<sub>2</sub>(dme) with ethylene (60 psi) at 80 °C in toluene for 24 h (600 MHz, 298K, C<sub>6</sub>D<sub>6</sub>).

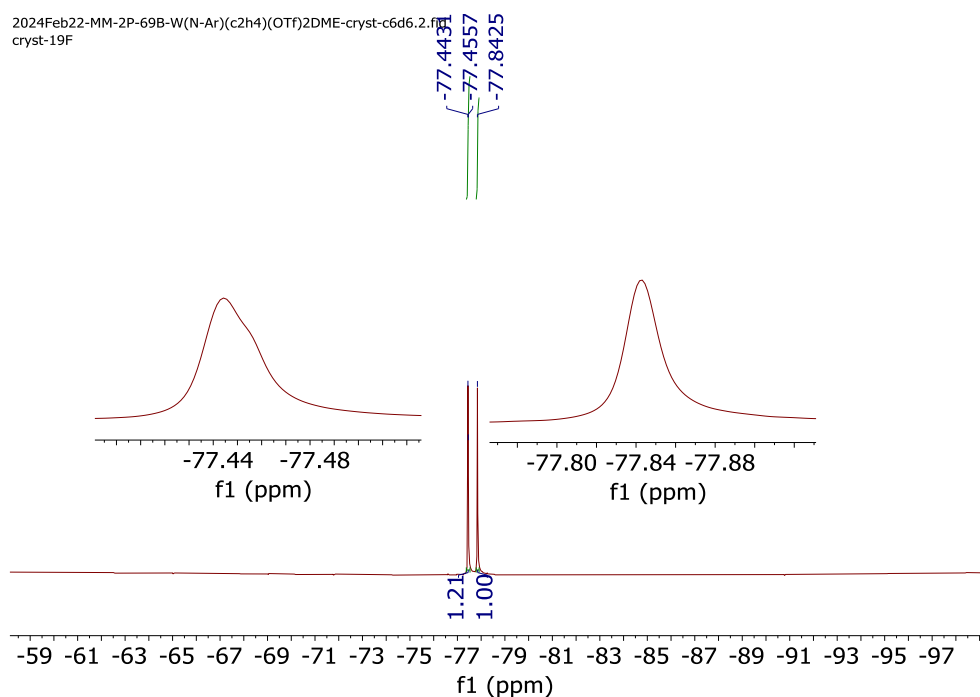

**Figure S84.** <sup>19</sup>F NMR spectra of W(NAr)(C<sub>2</sub>H<sub>4</sub>)(OTf)<sub>2</sub>(dme) in C<sub>6</sub>D<sub>6</sub> (564 MHz, 298K).

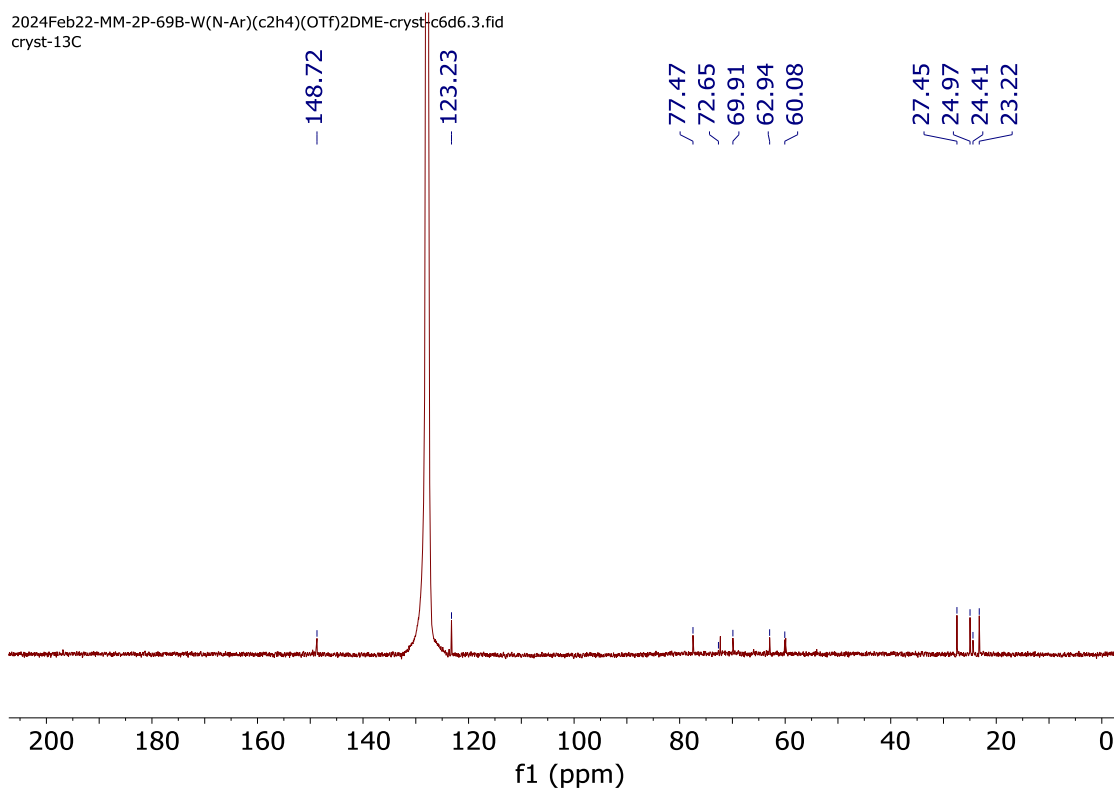

**Figure S85.**  $^{13}\text{C}$  NMR spectra of  $\text{W}(\text{NAr})(\text{C}_2\text{H}_4)(\text{OTf})_2(\text{dme})$  in  $\text{C}_6\text{D}_6$  (151 MHz, 298K).

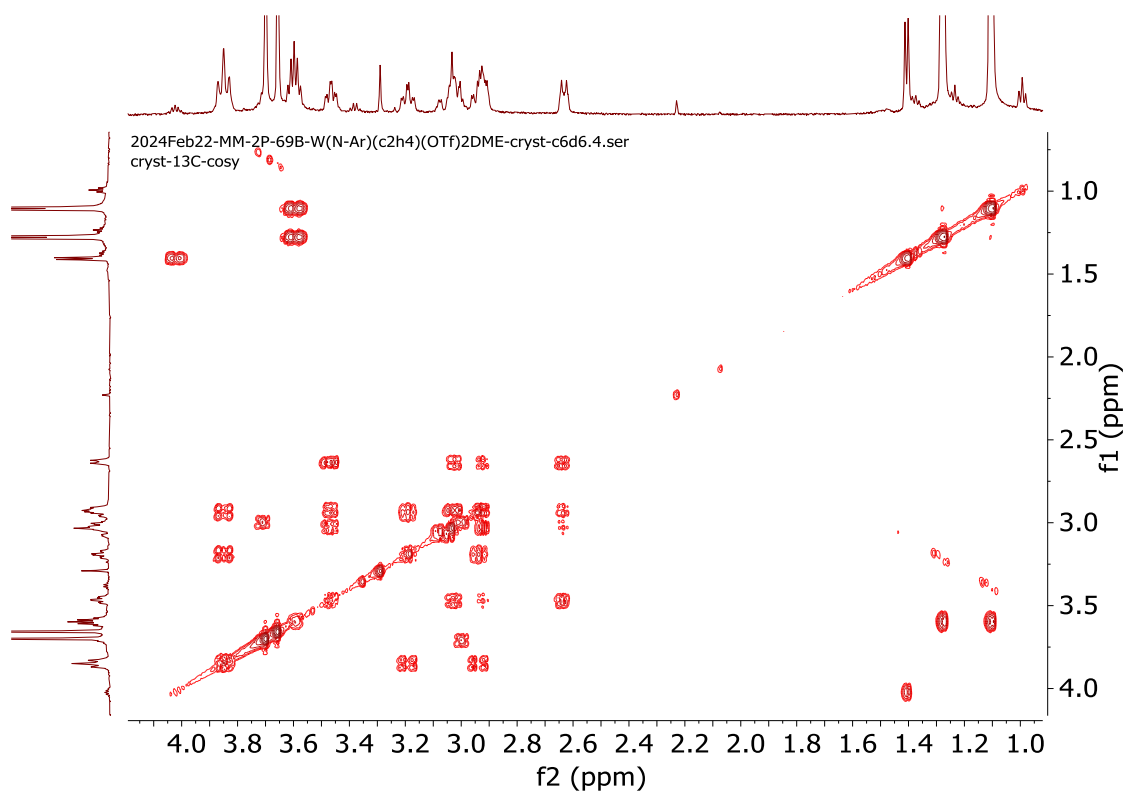

**Figure S86.**  $^1\text{H}$  COSY NMR spectra of  $\text{W}(\text{NAr})(\text{C}_2\text{H}_4)(\text{OTf})_2(\text{dme})$  in  $\text{C}_6\text{D}_6$  (151 MHz, 298K).

## 5. X-ray Crystallography

### Data collection

Single crystals suitable for X-ray diffraction was placed onto the tip of a MiTeGen pin and mounted on a Bruker Venture D8 diffractometer equipped with a PhotonIII detector. The data collection was carried out using Mo K $\alpha$  radiation ( $\lambda = 0.71073$  Å)/ Cu K $\alpha$  radiation ( $\lambda = 1.54178$  Å) from an I $\mu$ S micro-source. The frames were integrated with the Bruker SAINT<sup>2</sup> software package using a narrow-frame algorithm to 0.82 Å resolution. Data were corrected for absorption effects using the multi-scan method (SADABS).<sup>3</sup>

### Structure solution and refinement

The space group was determined based on intensity statistics and systematic absences. The structure was solved using the SHELX suite of programs<sup>[4,5]</sup> and refined using full-matrix least-squares on  $F^2$  within the OLEX2 suite,<sup>6</sup> An intrinsic phasing solution was calculated, which provided most non-hydrogen atoms from the E-map. Full-matrix least squares / difference Fourier cycles were performed, which located the remaining non-hydrogen atoms. All non-hydrogen atoms were refined with anisotropic displacement parameters. The hydrogen atoms were placed in ideal positions and refined as riding atoms with relative isotropic displacement parameters. Crystal and data quality details, as well as a summary of the residual refinement values, are listed in the following tables. All the crystallographic figures were generated using ORTEP-3 software.<sup>7</sup>

### W(NAr)<sub>2</sub>Et<sub>2</sub>

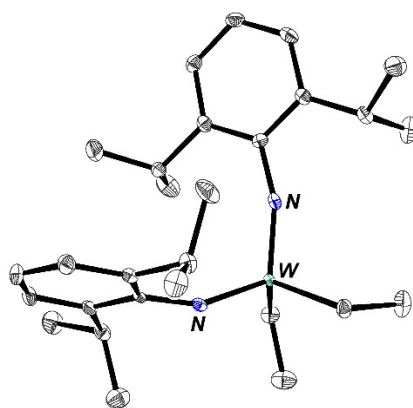

**Figure S87.** Thermal ellipsoid plot (40%) of W(NAr)<sub>2</sub>Et<sub>2</sub> (hydrogen atoms have been omitted for clarity).

**Table S1.** Crystal data and structure refinement for compound W(NAr)<sub>2</sub>Et<sub>2</sub> (deposition number 2419295).

|                                   |                                                                                                                                                                                           |
|-----------------------------------|-------------------------------------------------------------------------------------------------------------------------------------------------------------------------------------------|
| Empirical formula                 | C <sub>28</sub> H <sub>44</sub> N <sub>2</sub> W                                                                                                                                          |
| Formula weight                    | 592.50                                                                                                                                                                                    |
| Crystal color, shape, size        | yellow block, 0.35 × 0.18 × 0.17 mm <sup>3</sup>                                                                                                                                          |
| Temperature                       | 100.00 K                                                                                                                                                                                  |
| Wavelength                        | 1.54178 Å                                                                                                                                                                                 |
| Crystal system, space group       | Monoclinic, P 2 <sub>1</sub> /n                                                                                                                                                           |
| Unit cell dimensions              | a = 13.3829(9) Å      α = 90°.<br>b = 18.8032(13) Å      β = 106.6806(19)°.<br>c = 22.2737(15) Å      γ = 90°.                                                                            |
| Volume                            | 5369.1(6) Å <sup>3</sup>                                                                                                                                                                  |
| Z                                 | 8                                                                                                                                                                                         |
| Density (calculated)              | 1.466 g/cm <sup>3</sup>                                                                                                                                                                   |
| Absorption coefficient            | 8.075 mm <sup>-1</sup>                                                                                                                                                                    |
| F(000)                            | 2400                                                                                                                                                                                      |
| <b>Data collection</b>            |                                                                                                                                                                                           |
| Diffractometer                    | Bruker D8 Venture                                                                                                                                                                         |
| Theta range for data collection   | 3.133 to 68.272°.                                                                                                                                                                         |
| Index ranges                      | -16 ≤ h ≤ 16, -22 ≤ k ≤ 22, -26 ≤ l ≤ 26                                                                                                                                                  |
| Reflections collected             | 100571                                                                                                                                                                                    |
| Independent reflections           | 9678 [R <sub>int</sub> = 0.0351]                                                                                                                                                          |
| Observed Reflections              | 9674                                                                                                                                                                                      |
| Completeness to theta = 67.679°   | 98.4 %                                                                                                                                                                                    |
| <b>Solution and Refinement</b>    |                                                                                                                                                                                           |
| Absorption correction             | Semi-empirical from equivalents                                                                                                                                                           |
| Max. and min. transmission        | 0.7531 and 0.5008                                                                                                                                                                         |
| Solution                          | Intrinsic methods                                                                                                                                                                         |
| Refinement method                 | Full-matrix least-squares on F <sup>2</sup>                                                                                                                                               |
| Weighting scheme                  | w = [σ <sup>2</sup> F <sub>o</sub> <sup>2</sup> + AP <sup>2</sup> + BP] <sup>-1</sup> , with<br>P = (F <sub>o</sub> <sup>2</sup> + 2 F <sub>c</sub> <sup>2</sup> )/3, A = 0.009, B = 10.4 |
| Data / restraints / parameters    | 9678 / 0 / 579                                                                                                                                                                            |
| Goodness-of-fit on F <sup>2</sup> | 1.285                                                                                                                                                                                     |
| Final R indices [I > 2σ(I)]       | R <sub>1</sub> = 0.0217, wR <sub>2</sub> = 0.0529                                                                                                                                         |
| R indices (all data)              | R <sub>1</sub> = 0.0217, wR <sub>2</sub> = 0.0529                                                                                                                                         |
| Largest diff. peak and hole       | 0.980 and -1.279 e.Å <sup>-3</sup>                                                                                                                                                        |

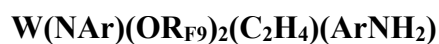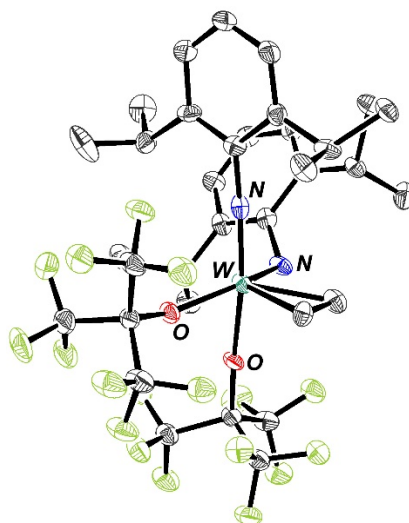

**Figure 88.** Thermal ellipsoid plot (40%) of W(NAr)(OR<sub>F9</sub>)<sub>2</sub>(C<sub>2</sub>H<sub>4</sub>)(ArNH<sub>2</sub>) (hydrogen atoms have been omitted for clarity).

**Table S2.** Crystal data and structure refinement for W(NAr)(OR<sub>F9</sub>)<sub>2</sub>(C<sub>2</sub>H<sub>4</sub>)(ArNH<sub>2</sub>) (deposition number 2419290).

|                             |                                                                                 |                 |
|-----------------------------|---------------------------------------------------------------------------------|-----------------|
| Empirical formula           | C <sub>34</sub> H <sub>40</sub> F <sub>18</sub> N <sub>2</sub> O <sub>2</sub> W |                 |
| Formula weight              | 1034.53                                                                         |                 |
| Crystal color, shape, size  | yellow block, 0.08 × 0.06 × 0.04 mm <sup>3</sup>                                |                 |
| Temperature                 | 110.0 K                                                                         |                 |
| Wavelength                  | 1.54178 Å                                                                       |                 |
| Crystal system, space group | Triclinic, P $\bar{1}$                                                          |                 |
| Unit cell dimensions        | a = 10.5049(9) Å                                                                | α = 87.086(5)°. |
|                             | b = 13.5610(11) Å                                                               | β = 87.639(6)°. |
|                             | c = 13.6443(11) Å                                                               | γ = 81.043(6)°. |
| Volume                      | 1916.4(3) Å <sup>3</sup>                                                        |                 |
| Z                           | 2                                                                               |                 |
| Density (calculated)        | 1.793 g/cm <sup>3</sup>                                                         |                 |
| Absorption coefficient      | 6.710 mm <sup>-1</sup>                                                          |                 |
| F(000)                      | 1020                                                                            |                 |

#### Data collection

|                                 |                                          |
|---------------------------------|------------------------------------------|
| Diffractometer                  | Bruker D8 Venture                        |
| Theta range for data collection | 3.245 to 68.784°.                        |
| Index ranges                    | -12 ≤ h ≤ 12, -15 ≤ k ≤ 16, -16 ≤ l ≤ 16 |
| Reflections collected           | 23570                                    |
| Independent reflections         | 6900 [R <sub>int</sub> = 0.0775]         |
| Observed Reflections            | 5966                                     |
| Completeness to theta = 67.679° | 98.0 %                                   |

## Solution and Refinement

|                                      |                                                                                                        |
|--------------------------------------|--------------------------------------------------------------------------------------------------------|
| Absorption correction                | Semi-empirical from equivalents                                                                        |
| Max. and min. transmission           | 0.7509 and 0.6109                                                                                      |
| Solution                             | Intrinsic methods                                                                                      |
| Refinement method                    | Full-matrix least-squares on $F^2$                                                                     |
| Weighting scheme                     | $w = [\sigma^2 F_o^2 + AP^2 + BP]^{-1}$ , with<br>$P = (F_o^2 + 2 F_c^2)/3$ , $A = 0.068$ , $B = 28.9$ |
| Data / restraints / parameters       | 6900 / 0 / 522                                                                                         |
| Goodness-of-fit on $F^2$             | 1.094                                                                                                  |
| Final R indices [ $I > 2\sigma(I)$ ] | $R1 = 0.0665$ , $wR2 = 0.1687$                                                                         |
| R indices (all data)                 | $R1 = 0.0791$ , $wR2 = 0.1793$                                                                         |
| Largest diff. peak and hole          | 4.716 and -1.914 e.Å <sup>-3</sup>                                                                     |

## W(NAr)(Ar'NH)(ArNH<sub>2</sub>)(OR<sub>F9</sub>)

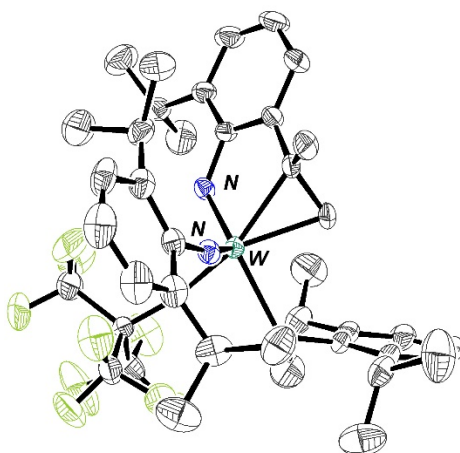

**Figure S89.** Thermal ellipsoid plot (40%) of W(NAr)(Ar'NH)(ArNH<sub>2</sub>)(OR<sub>F9</sub>) (hydrogen atoms have been omitted for clarity).

**Table S3.** Crystal data and structure refinement for W(NAr)(Ar'NH)(ArNH<sub>2</sub>)(OR<sub>F9</sub>) (deposition number 2419293).

|                             |                                                                  |
|-----------------------------|------------------------------------------------------------------|
| Empirical formula           | C <sub>40</sub> H <sub>52</sub> F <sub>9</sub> N <sub>3</sub> OW |
| Formula weight              | 945.69                                                           |
| Crystal color, shape, size  | orange block, 0.4 × 0.36 × 0.22 mm <sup>3</sup>                  |
| Temperature                 | 298.0 K                                                          |
| Wavelength                  | 0.71073 Å                                                        |
| Crystal system, space group | Triclinic, $P\bar{1}$                                            |
| Unit cell dimensions        | $a = 11.223(9)$ Å $\alpha = 77.46(2)^\circ$ .                    |

|                                   |                                                                                                                                                        |                |
|-----------------------------------|--------------------------------------------------------------------------------------------------------------------------------------------------------|----------------|
|                                   | b = 12.684(10) Å                                                                                                                                       | β = 76.31(4)°. |
|                                   | c = 16.267(13) Å                                                                                                                                       | γ = 70.79(2)°. |
| Volume                            | 2100(3) Å <sup>3</sup>                                                                                                                                 |                |
| Z                                 | 2                                                                                                                                                      |                |
| Density (calculated)              | 1.496 g/cm <sup>3</sup>                                                                                                                                |                |
| Absorption coefficient            | 2.824 mm <sup>-1</sup>                                                                                                                                 |                |
| F(000)                            | 952                                                                                                                                                    |                |
| <b>Data collection</b>            |                                                                                                                                                        |                |
| Diffractometer                    | Bruker D8 Venture                                                                                                                                      |                |
| Theta range for data collection   | 1.720 to 25.961°.                                                                                                                                      |                |
| Index ranges                      | -13<=h<=13, -15<=k<=15, -19<=l<=19                                                                                                                     |                |
| Reflections collected             | 44071                                                                                                                                                  |                |
| Independent reflections           | 7966 [Rint = 0.0788]                                                                                                                                   |                |
| Observed Reflections              | 6826                                                                                                                                                   |                |
| Completeness to theta = 25.242°   | 99.0 %                                                                                                                                                 |                |
| <b>Solution and Refinement</b>    |                                                                                                                                                        |                |
| Absorption correction             | Semi-empirical from equivalents                                                                                                                        |                |
| Max. and min. transmission        | 0.7453 and 0.4929                                                                                                                                      |                |
| Solution                          | Intrinsic methods                                                                                                                                      |                |
| Refinement method                 | Full-matrix least-squares on F <sup>2</sup>                                                                                                            |                |
| Weighting scheme                  | w = [σ <sup>2</sup> Fo <sup>2</sup> + AP <sup>2</sup> + BP] <sup>-1</sup> , with<br>P = (Fo <sup>2</sup> + 2 Fc <sup>2</sup> )/3, A = 0.105, B = 0.000 |                |
| Data / restraints / parameters    | 7966 / 0 / 498                                                                                                                                         |                |
| Goodness-of-fit on F <sup>2</sup> | 1.077                                                                                                                                                  |                |
| Final R indices [I>2σ(I)]         | R1 = 0.0506, wR2 = 0.1319                                                                                                                              |                |
| R indices (all data)              | R1 = 0.0630, wR2 = 0.1462                                                                                                                              |                |
| Largest diff. peak and hole       | 2.239 and -2.427 e.Å <sup>-3</sup>                                                                                                                     |                |

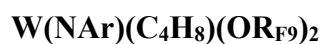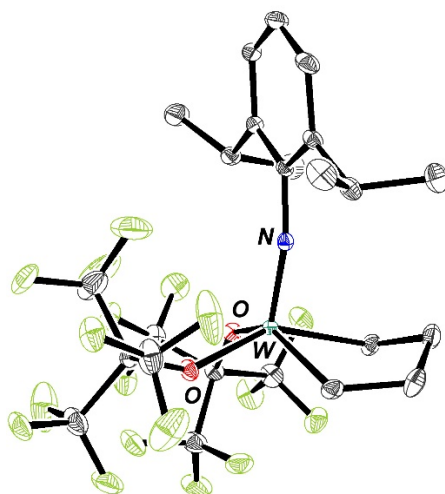

**Figure S90.** Thermal ellipsoid plot (40%) of compound W(NAr)(C<sub>4</sub>H<sub>8</sub>)(OR<sub>F9</sub>)<sub>2</sub> (hydrogen atoms have been omitted for clarity).

**Table S4.** Crystal data and structure refinement for compound W(NAr)(C<sub>4</sub>H<sub>8</sub>)(OR<sub>F9</sub>)<sub>2</sub> (deposition number 2419296).

|                                    |                                                                   |
|------------------------------------|-------------------------------------------------------------------|
| Empirical formula                  | C <sub>24</sub> H <sub>25</sub> F <sub>18</sub> NO <sub>2</sub> W |
| Formula weight                     | 885.30                                                            |
| Temperature/K                      | 100.00                                                            |
| Crystal system                     | orthorhombic                                                      |
| Space group                        | Pbca                                                              |
| a/Å                                | 10.2840(4)                                                        |
| b/Å                                | 18.2199(7)                                                        |
| c/Å                                | 30.9881(12)                                                       |
| α/°                                | 90                                                                |
| β/°                                | 90                                                                |
| γ/°                                | 90                                                                |
| Volume/Å <sup>3</sup>              | 5806.3(4)                                                         |
| Z                                  | 8                                                                 |
| ρ <sub>calc</sub> /cm <sup>3</sup> | 2.025                                                             |
| μ/mm <sup>-1</sup>                 | 8.710                                                             |
| F(000)                             | 3424.0                                                            |
| Crystal size/mm <sup>3</sup>       | 0.18 × 0.17 × 0.09                                                |
| Radiation                          | CuKα (λ = 1.54178)                                                |
| 2Θ range for data collection/°     | 10.12 to 140.122                                                  |
| Index ranges                       | -12 ≤ h ≤ 12, -22 ≤ k ≤ 22, -37 ≤ l ≤ 37                          |
| Reflections collected              | 130741                                                            |
| Independent reflections            | 5498 [R <sub>int</sub> = 0.0451, R <sub>sigma</sub> = 0.0164]     |



|                                                |                                  |
|------------------------------------------------|----------------------------------|
| Data/restraints/parameters                     | 5498/30/396                      |
| Goodness-of-fit on $F^2$                       | 1.051                            |
| Final R indexes [ $I \geq 2\sigma(I)$ ]        | $R_1 = 0.0331$ , $wR_2 = 0.0795$ |
| Final R indexes [all data]                     | $R_1 = 0.0335$ , $wR_2 = 0.0797$ |
| Largest diff. peak/hole / $e \text{ \AA}^{-3}$ | 1.75/-1.47                       |

**W(NAr)(C<sub>3</sub>H<sub>6</sub>)(OR<sub>F9</sub>)<sub>2</sub>**

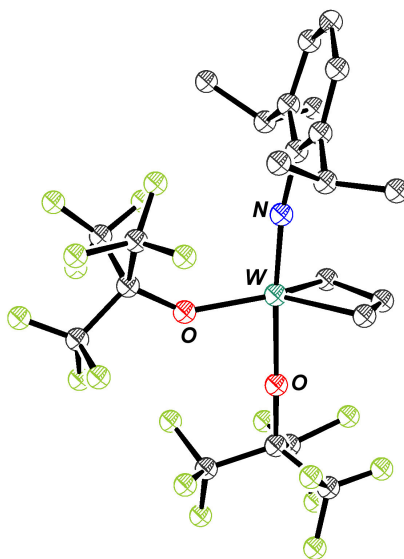

**Figure S91.** Thermal ellipsoid plot (40%) of compound W(NAr)(C<sub>3</sub>H<sub>6</sub>)(OR<sub>F9</sub>)<sub>2</sub> (hydrogen atoms have been omitted for clarity).

**Table S5.** Crystal data and structure refinement for compound W(NAr)(C<sub>3</sub>H<sub>6</sub>)(OR<sub>F9</sub>)<sub>2</sub> (deposition number 2419291).

|                             |                                                                   |
|-----------------------------|-------------------------------------------------------------------|
| Empirical formula           | C <sub>23</sub> H <sub>23</sub> F <sub>18</sub> NO <sub>2</sub> W |
| Formula weight              | 871.27                                                            |
| Crystal color, shape, size  | yellow block, 0.08 × 0.07 × 0.07 mm <sup>3</sup>                  |
| Temperature                 | 100.00 K                                                          |
| Wavelength                  | 1.54184 Å                                                         |
| Crystal system, space group | Monoclinic, C 2                                                   |
| Unit cell dimensions        | a = 20.517(2) Å<br>b = 11.7363(13) Å<br>c = 11.8494(11) Å         |
| Volume                      | 2834.1(5) Å <sup>3</sup>                                          |
| Z                           | 4                                                                 |
| Density (calculated)        | 2.042 g/cm <sup>3</sup>                                           |
| Absorption coefficient      | 8.910 mm <sup>-1</sup>                                            |

|                                 |                                          |
|---------------------------------|------------------------------------------|
| F(000)                          | 1680                                     |
| <b>Data collection</b>          |                                          |
| Diffractometer                  | Bruker D8 Venture                        |
| Theta range for data collection | 5.403 to 70.040°.                        |
| Index ranges                    | -24 ≤ h ≤ 24, -14 ≤ k ≤ 14, -13 ≤ l ≤ 14 |
| Reflections collected           | 25024                                    |
| Independent reflections         | 5212 [Rint = 0.0354]                     |
| Observed Reflections            | 5105                                     |
| Completeness to theta = 67.684° | 99.3 %                                   |
| <b>Solution and Refinement</b>  |                                          |
| Absorption correction           | Semi-empirical from equivalents          |
| Max. and min. transmission      | 0.7533 and 0.6026                        |

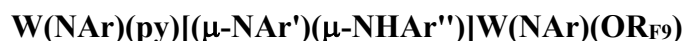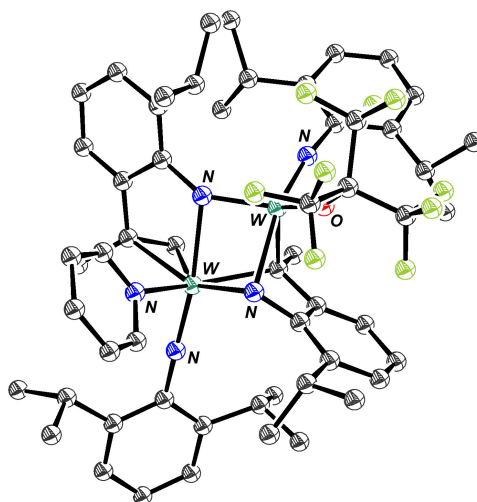

**Figure S92.** Thermal ellipsoid plot (40%) of W(NAr)(py)[(μ-NAr')(μ-NHAr'')]W(NAr)(OR<sub>F9</sub>) (hydrogen atoms have been omitted for clarity).

**Table S6.** Crystal data and structure refinement for W(NAr)(py)[(μ-NAr')(μ-NHAr'')]W(NAr)(OR<sub>F9</sub>) (deposition number 2480801).

|                             |                                                                                               |          |  |
|-----------------------------|-----------------------------------------------------------------------------------------------|----------|--|
| Empirical formula           | C <sub>58</sub> H <sub>73</sub> F <sub>9</sub> N <sub>5</sub> O <sub>1.5</sub> W <sub>2</sub> |          |  |
| Formula weight              | 1402.91                                                                                       |          |  |
| Crystal color, shape, size  | red plate, 0.11 × 0.06 × 0.05 mm <sup>3</sup>                                                 |          |  |
| Temperature                 | 100.0 K                                                                                       |          |  |
| Wavelength                  | 1.54178 Å                                                                                     |          |  |
| Crystal system, space group | Orthorhombic, Pna2 <sub>1</sub>                                                               |          |  |
| Unit cell dimensions        | a = 20.8163(6) Å                                                                              | α = 90°. |  |
|                             | b = 13.7960(4) Å                                                                              | β = 90°. |  |
|                             | c = 39.1164(11) Å                                                                             | γ = 90°. |  |

|                        |                           |
|------------------------|---------------------------|
| Volume                 | 11233.5(6) Å <sup>3</sup> |
| Z                      | 8                         |
| Density (calculated)   | 1.659 g/cm <sup>3</sup>   |
| Absorption coefficient | 8.095 mm <sup>-1</sup>    |
| F(000)                 | 5576                      |

### Data collection

|                                 |                                          |
|---------------------------------|------------------------------------------|
| Diffractometer                  | Bruker D8 VENTURE                        |
| Theta range for data collection | 2.259 to 70.178°.                        |
| Index ranges                    | -25 ≤ h ≤ 25, -16 ≤ k ≤ 16, -47 ≤ l ≤ 47 |
| Reflections collected           | 193781                                   |
| Independent reflections         | 21316 [R <sub>int</sub> = 0.0780]        |
| Observed Reflections            | 20091                                    |
| Completeness to theta = 67.679° | 100.0 %                                  |

### Solution and Refinement

|                                   |                                                                                                                                                                                          |
|-----------------------------------|------------------------------------------------------------------------------------------------------------------------------------------------------------------------------------------|
| Absorption correction             | Semi-empirical from equivalents                                                                                                                                                          |
| Max. and min. transmission        | 0.7533 and 0.6014                                                                                                                                                                        |
| Solution                          | Intrinsic methods                                                                                                                                                                        |
| Refinement method                 | Full-matrix least-squares on F <sup>2</sup>                                                                                                                                              |
| Weighting scheme                  | w = [σ <sup>2</sup> F <sub>o</sub> <sup>2</sup> + AP <sup>2</sup> + BP] <sup>-1</sup> , with<br>P = (F <sub>o</sub> <sup>2</sup> + 2 F <sub>c</sub> <sup>2</sup> )/3, A = 0.017, B = 187 |
| Data / restraints / parameters    | 21316 / 1513 / 1210                                                                                                                                                                      |
| Goodness-of-fit on F <sup>2</sup> | 1.132                                                                                                                                                                                    |
| Final R indices [I > 2σ(I)]       | R <sub>1</sub> = 0.0493, wR <sub>2</sub> = 0.1194                                                                                                                                        |
| R indices (all data)              | R <sub>1</sub> = 0.0535, wR <sub>2</sub> = 0.1219                                                                                                                                        |
| Absolute structure parameter      | 0.242(18)                                                                                                                                                                                |
| Largest diff. peak and hole       | 3.052 and -3.561 e.Å <sup>-3</sup>                                                                                                                                                       |

### Twin Details

|                            |                                        |
|----------------------------|----------------------------------------|
| Type, twin law             | inversion twin, -1 0 0, 0 -1 0, 0 0 -1 |
| Twin element, domain ratio | inversion, 76:24                       |

## 6. References

1. R. R. Schrock, R. T. DePue, J. Feldman, K. B. Yap, D. C. Yang, W. M. Davis, L. Park, M. DiMare, M. Schofield, *Organometallics* **1990**, 9, 2262-2275.
2. SAINT, V8.30A, Bruker Analytical X-Ray Systems, Madison, WI, 2012.
3. SADABS, 2.03, Bruker Analytical X-Ray Systems Inc., Madison, WI, USA, 2016.
4. G. M. Sheldrick, *Acta Cryst.* **2008**, A64, 112-122.
5. G. M. Sheldrick, *Acta Cryst.* **2015**, A71, 3-8.
6. O. V. Dolomanov, L. J. Bourhis, R. J. Gildea, J. A. K. Howard, H. J. Puschmann, *Appl. Crystallogr.* **2009**, 42, 339-341.
7. M. N. Burnett, C. K. Johnson, ORTEP-III: Oak Ridge Thermal Ellipsoid Plot Program for Crystal Structure Illustrations, Oak Ridge National Laboratory Report ORNL-6895, 1996.
